# Supplementary material for: Selection on plastic adherence leads to hyper-multicellular strains and incidental virulence in the budding yeast
Source: eLife. 2023 Nov 2;12:e81056. doi: 10.7554/eLife.81056 (PMC10764007; doi:10.7554/eLife.81056)
Supplement: Figure 1—source data 1. [file elife-81056-fig1-data1.csv]

Sample	Treatment	Assay	Cycle	Cells	CellsOnBead
A7a	Asexual	A	1	27	607500
A7a	Asexual	A	1	41	922500
A7a	Asexual	A	1	10	225000
A7a	Asexual	A	1
A7a	Asexual	B	1	26	585000
A7a	Asexual	B	1	28	630000
A7a	Asexual	B	1	17	382500
A7a	Asexual	B	1	38	855000
A7a	Asexual	A	2	8	180000
A7a	Asexual	A	2	18	405000
A7a	Asexual	A	2	52	1170000
A7a	Asexual	A	2
A7a	Asexual	B	2	9	202500
A7a	Asexual	B	2	6	135000
A7a	Asexual	B	2	9	202500
A7a	Asexual	B	2	13	292500
A7a	Asexual	A	3	26	585000
A7a	Asexual	A	3	20	450000
A7a	Asexual	A	3	9	202500
A7a	Asexual	A	3	6	135000
A7a	Asexual	B	3	17	382500
A7a	Asexual	B	3	21	472500
A7a	Asexual	B	3	6	135000
A7a	Asexual	B	3	5	112500
A7a	Asexual	A	4	16	360000
A7a	Asexual	A	4	28	630000
A7a	Asexual	A	4	9	202500
A7a	Asexual	A	4	9	202500
A7a	Asexual	B	4	15	337500
A7a	Asexual	B	4	18	405000
A7a	Asexual	B	4	25	562500
A7a	Asexual	B	4	30	675000
A7a	Asexual	A	5	46	1035000
A7a	Asexual	A	5	52	1170000
A7a	Asexual	A	5	10	225000
A7a	Asexual	A	5	9	202500
A7a	Asexual	B	5	18	405000
A7a	Asexual	B	5	8	180000
A7a	Asexual	B	5	20	450000
A7a	Asexual	B	5	27	607500
A7a	Asexual	A	6	9	202500
A7a	Asexual	A	6	8	180000
A7a	Asexual	A	6	23	517500
A7a	Asexual	A	6	17	382500
A7a	Asexual	B	6	31	697500
A7a	Asexual	B	6	2	45000
A7a	Asexual	B	6	38	855000
A7a	Asexual	B	6	24	540000
A7a	Asexual	A	7	22	495000
A7a	Asexual	A	7	15	337500
A7a	Asexual	A	7	27	607500
A7a	Asexual	A	7	42	945000
A7a	Asexual	B	7	12	270000
A7a	Asexual	B	7	21	472500
A7a	Asexual	B	7	25	562500
A7a	Asexual	B	7	39	877500
A7a	Asexual	A	8	37	832500
A7a	Asexual	A	8	28	630000
A7a	Asexual	A	8	16	360000
A7a	Asexual	A	8	17	382500
A7a	Asexual	B	8	6	135000
A7a	Asexual	B	8	6	135000
A7a	Asexual	B	8	25	562500
A7a	Asexual	B	8	45	1012500
A7b	Asexual	A	1	20	450000
A7b	Asexual	A	1	9	202500
A7b	Asexual	A	1	31	697500
A7b	Asexual	A	1	22	495000
A7b	Asexual	B	1	10	225000
A7b	Asexual	B	1	43	967500
A7b	Asexual	B	1	18	405000
A7b	Asexual	B	1	16	360000
A7b	Asexual	A	2	9	202500
A7b	Asexual	A	2	5	112500
A7b	Asexual	A	2	71	1597500
A7b	Asexual	A	2	53	1192500
A7b	Asexual	B	2	42	945000
A7b	Asexual	B	2	24	540000
A7b	Asexual	B	2	47	1057500
A7b	Asexual	B	2	36	810000
A7b	Asexual	B	2	27	607500
A7b	Asexual	A	3	62	1395000
A7b	Asexual	A	3	70	1575000
A7b	Asexual	A	3	55	1237500
A7b	Asexual	A	3	43	967500
A7b	Asexual	B	3	10	225000
A7b	Asexual	B	3	8	180000
A7b	Asexual	B	3	9	202500
A7b	Asexual	B	3	6	135000
A7b	Asexual	A	4	111	2497500
A7b	Asexual	A	4	92	2070000
A7b	Asexual	A	4	88	1980000
A7b	Asexual	A	4	97	2182500
A7b	Asexual	B	4	118	2655000
A7b	Asexual	B	4	98	2205000
A7b	Asexual	B	4	120	2700000
A7b	Asexual	B	4	73	1642500
A7b	Asexual	A	5	59	1327500
A7b	Asexual	A	5	26	585000
A7b	Asexual	A	5	82	1845000
A7b	Asexual	A	5	128	2880000
A7b	Asexual	B	5	38	855000
A7b	Asexual	B	5	117	2632500
A7b	Asexual	B	5	40	900000
A7b	Asexual	B	5	77	1732500
A7b	Asexual	A	6	53	1192500
A7b	Asexual	A	6	71	1597500
A7b	Asexual	A	6	143	3217500
A7b	Asexual	A	6	185	4162500
A7b	Asexual	B	6	51	1147500
A7b	Asexual	B	6	79	1777500
A7b	Asexual	B	6	126	2835000
A7b	Asexual	B	6	122	2745000
A7b	Asexual	A	7	215	4837500
A7b	Asexual	A	7	126	2835000
A7b	Asexual	A	7	93	2092500
A7b	Asexual	A	7	115	2587500
A7b	Asexual	B	7	22	495000
A7b	Asexual	B	7	8	180000
A7b	Asexual	B	7	92	2070000
A7b	Asexual	B	7	145	3262500
A7b	Asexual	A	8	105	2362500
A7b	Asexual	A	8	94	2115000
A7b	Asexual	A	8	56	1260000
A7b	Asexual	A	8	102	2295000
A7b	Asexual	B	8	73	1642500
A7b	Asexual	B	8	18	405000
A7b	Asexual	B	8	98	2205000
A7b	Asexual	B	8	66	1485000
A7c	Asexual	A	1	73	1642500
A7c	Asexual	A	1	36	810000
A7c	Asexual	A	1	12	270000
A7c	Asexual	A	1	19	427500
A7c	Asexual	B	1	54	1215000
A7c	Asexual	B	1	92	2070000
A7c	Asexual	B	1	70	1575000
A7c	Asexual	B	1	91	2047500
A7c	Asexual	A	2	18	405000
A7c	Asexual	A	2	28	630000
A7c	Asexual	A	2	69	1552500
A7c	Asexual	A	2	64	1440000
A7c	Asexual	B	2	117	2632500
A7c	Asexual	B	2	78	1755000
A7c	Asexual	B	2	56	1260000
A7c	Asexual	B	2	16	360000
A7c	Asexual	A	3	64	1440000
A7c	Asexual	A	3	57	1282500
A7c	Asexual	A	3	49	1102500
A7c	Asexual	A	3	52	1170000
A7c	Asexual	B	3	6	135000
A7c	Asexual	B	3	3	67500
A7c	Asexual	B	3	3	67500
A7c	Asexual	B	3	2	45000
A7c	Asexual	A	4	9	202500
A7c	Asexual	A	4	8	180000
A7c	Asexual	A	4	61	1372500
A7c	Asexual	A	4	36	810000
A7c	Asexual	B	4	30	675000
A7c	Asexual	B	4	19	427500
A7c	Asexual	B	4	29	652500
A7c	Asexual	B	4	27	607500
A7c	Asexual	A	5	49	1102500
A7c	Asexual	A	5	57	1282500
A7c	Asexual	A	5	30	675000
A7c	Asexual	A	5	30	675000
A7c	Asexual	B	5	33	742500
A7c	Asexual	B	5	50	1125000
A7c	Asexual	B	5	23	517500
A7c	Asexual	B	5	20	450000
A7c	Asexual	A	6	17	382500
A7c	Asexual	A	6	13	292500
A7c	Asexual	A	6	29	652500
A7c	Asexual	A	6	28	630000
A7c	Asexual	B	6	69	1552500
A7c	Asexual	B	6	70	1575000
A7c	Asexual	B	6	29	652500
A7c	Asexual	B	6	64	1440000
A7c	Asexual	A	7	43	967500
A7c	Asexual	A	7	62	1395000
A7c	Asexual	A	7	63	1417500
A7c	Asexual	A	7	68	1530000
A7c	Asexual	B	7	11	247500
A7c	Asexual	B	7	8	180000
A7c	Asexual	B	7	27	607500
A7c	Asexual	B	7	36	810000
A7c	Asexual	A	8	20	450000
A7c	Asexual	A	8	30	675000
A7c	Asexual	A	8	61	1372500
A7c	Asexual	A	8	37	832500
A7c	Asexual	B	8	6	135000
A7c	Asexual	B	8	3	67500
A7c	Asexual	B	8	43	967500
A7c	Asexual	B	8	42	945000
A7d	Asexual	A	1	38	855000
A7d	Asexual	A	1	31	697500
A7d	Asexual	A	1	77	1732500
A7d	Asexual	A	1	70	1575000
A7d	Asexual	B	1	46	1035000
A7d	Asexual	B	1	44	990000
A7d	Asexual	B	1	38	855000
A7d	Asexual	B	1	32	720000
A7d	Asexual	A	2	60	1350000
A7d	Asexual	A	2	76	1710000
A7d	Asexual	A	2	76	1710000
A7d	Asexual	A	2	34	765000
A7d	Asexual	B	2	16	360000
A7d	Asexual	B	2	14	315000
A7d	Asexual	B	2	28	630000
A7d	Asexual	B	2	20	450000
A7d	Asexual	A	3	26	585000
A7d	Asexual	A	3	24	540000
A7d	Asexual	A	3	29	652500
A7d	Asexual	A	3	26	585000
A7d	Asexual	B	3	11	247500
A7d	Asexual	B	3	15	337500
A7d	Asexual	B	3	5	112500
A7d	Asexual	B	3	4	90000
A7d	Asexual	A	4	56	1260000
A7d	Asexual	A	4	48	1080000
A7d	Asexual	A	4	21	472500
A7d	Asexual	A	4	32	720000
A7d	Asexual	B	4	26	585000
A7d	Asexual	B	4	16	360000
A7d	Asexual	B	4	37	832500
A7d	Asexual	B	4	77	1732500
A7d	Asexual	A	5	19	427500
A7d	Asexual	A	5	19	427500
A7d	Asexual	A	5	10	225000
A7d	Asexual	A	5	55	1237500
A7d	Asexual	B	5	28	630000
A7d	Asexual	B	5	69	1552500
A7d	Asexual	B	5	34	765000
A7d	Asexual	B	5	10	225000
A7d	Asexual	A	6	18	405000
A7d	Asexual	A	6	11	247500
A7d	Asexual	A	6	11	247500
A7d	Asexual	A	6	30	675000
A7d	Asexual	B	6
A7d	Asexual	B	6
A7d	Asexual	B	6	11	247500
A7d	Asexual	B	6	88	1980000
A7d	Asexual	A	7	27	607500
A7d	Asexual	A	7	11	247500
A7d	Asexual	A	7	41	922500
A7d	Asexual	A	7	15	337500
A7d	Asexual	B	7	8	180000
A7d	Asexual	B	7	5	112500
A7d	Asexual	B	7	42	945000
A7d	Asexual	B	7	43	967500
A7d	Asexual	B	7	7	157500
A7d	Asexual	A	8	22	495000
A7d	Asexual	A	8	38	855000
A7d	Asexual	A	8	43	967500
A7d	Asexual	A	8	19	427500
A7d	Asexual	B	8	7	157500
A7d	Asexual	B	8	32	720000
A7d	Asexual	B	8	15	337500
Ancestor	Ancestor	A	0	9	202500
Ancestor	Ancestor	A	0	6	135000
Ancestor	Ancestor	A	0	13	292500
Ancestor	Ancestor	A	0	10	225000
Ancestor	Ancestor	A	0	37	832500
Ancestor	Ancestor	A	0	12	270000
Ancestor	Ancestor	A	0	32	720000
Ancestor	Ancestor	A	0	26	585000
Ancestor	Ancestor	A	0	11	247500
Ancestor	Ancestor	A	0	14	315000
Ancestor	Ancestor	A	0	48	1080000
Ancestor	Ancestor	A	0	16	360000
Ancestor	Ancestor	A	0	21	472500
Ancestor	Ancestor	A	0	14	315000
Ancestor	Ancestor	A	0	18	405000
Ancestor	Ancestor	A	0	21	472500
Ancestor	Ancestor	A	0	23	517500
Ancestor	Ancestor	A	0	15	337500
Ancestor	Ancestor	B	0	15	337500
Ancestor	Ancestor	B	0	2	45000
Ancestor	Ancestor	B	0	4	90000
Ancestor	Ancestor	B	0	8	180000
Ancestor	Ancestor	B	0	4	90000
Ancestor	Ancestor	B	0	6	135000
Ancestor	Ancestor	B	0	7	157500
Ancestor	Ancestor	B	0	7	157500
Ancestor	Ancestor	B	0	8	180000
Ancestor	Ancestor	B	0	8	180000
C7a	Control	A	1	20	450000
C7a	Control	A	1	18	405000
C7a	Control	A	1	8	180000
C7a	Control	A	1	4	90000
C7a	Control	B	1	12	270000
C7a	Control	B	1	31	697500
C7a	Control	B	1	4	90000
C7a	Control	B	1	36	810000
C7a	Control	A	2	15	337500
C7a	Control	A	2	26	585000
C7a	Control	A	2	7	157500
C7a	Control	A	2	3	67500
C7a	Control	B	2	7	157500
C7a	Control	B	2	2	45000
C7a	Control	B	2	4	90000
C7a	Control	B	2	4	90000
C7a	Control	A	3	12	270000
C7a	Control	A	3	19	427500
C7a	Control	A	3	9	202500
C7a	Control	A	3	10	225000
C7a	Control	B	3	5	112500
C7a	Control	B	3	3	67500
C7a	Control	B	3	11	247500
C7a	Control	B	3	10	225000
C7a	Control	A	4	15	337500
C7a	Control	A	4	8	180000
C7a	Control	A	4	5	112500
C7a	Control	A	4	3	67500
C7a	Control	B	4	50	1125000
C7a	Control	B	4	40	900000
C7a	Control	B	4	34	765000
C7a	Control	B	4	13	292500
C7a	Control	A	5	7	157500
C7a	Control	A	5	15	337500
C7a	Control	A	5	7	157500
C7a	Control	A	5	5	112500
C7a	Control	B	5	9	202500
C7a	Control	B	5	15	337500
C7a	Control	B	5	38	855000
C7a	Control	B	5	16	360000
C7a	Control	A	6	16	360000
C7a	Control	A	6	9	202500
C7a	Control	A	6	8	180000
C7a	Control	A	6	6	135000
C7a	Control	B	6	7	157500
C7a	Control	B	6	27	607500
C7a	Control	B	6	31	697500
C7a	Control	B	6	27	607500
C7a	Control	A	7	4	90000
C7a	Control	A	7	6	135000
C7a	Control	A	7	7	157500
C7a	Control	A	7	6	135000
C7a	Control	B	7	17	382500
C7a	Control	B	7	21	472500
C7a	Control	B	7	4	90000
C7a	Control	B	7	1	22500
C7a	Control	A	8	6	135000
C7a	Control	A	8	4	90000
C7a	Control	A	8	4	90000
C7a	Control	A	8	5	112500
C7a	Control	B	8	2	45000
C7a	Control	B	8	10	225000
C7a	Control	B	8	44	990000
C7a	Control	B	8	20	450000
C7s	Control	A	1
C7s	Control	A	1	13	292500
C7s	Control	A	1	18	405000
C7s	Control	A	1	7	157500
C7s	Control	B	1	60	1350000
C7s	Control	B	1	22	495000
C7s	Control	B	1	43	967500
C7s	Control	B	1	5	112500
C7s	Control	A	2	11	247500
C7s	Control	A	2	21	472500
C7s	Control	A	2	8	180000
C7s	Control	A	2	20	450000
C7s	Control	B	2	2	45000
C7s	Control	B	2	1	22500
C7s	Control	B	2	3	67500
C7s	Control	B	2	5	112500
C7s	Control	A	3	15	337500
C7s	Control	A	3	15	337500
C7s	Control	A	3	7	157500
C7s	Control	A	3	8	180000
C7s	Control	B	3	28	630000
C7s	Control	B	3	6	135000
C7s	Control	B	3	53	1192500
C7s	Control	B	3	21	472500
C7s	Control	A	4	14	315000
C7s	Control	A	4	21	472500
C7s	Control	A	4	10	225000
C7s	Control	A	4	33	742500
C7s	Control	B	4	55	1237500
C7s	Control	B	4	28	630000
C7s	Control	B	4	2	45000
C7s	Control	B	4	33	742500
C7s	Control	A	5	15	337500
C7s	Control	A	5	8	180000
C7s	Control	A	5	31	697500
C7s	Control	A	5	61	1372500
C7s	Control	B	5	18	405000
C7s	Control	B	5	25	562500
C7s	Control	B	5	44	990000
C7s	Control	B	5	52	1170000
C7s	Control	A	6	30	675000
C7s	Control	A	6	29	652500
C7s	Control	A	6	2	45000
C7s	Control	A	6	12	270000
C7s	Control	B	6	6	135000
C7s	Control	B	6	7	157500
C7s	Control	B	6	14	315000
C7s	Control	B	6	13	292500
C7s	Control	A	7	1	22500
C7s	Control	A	7	6	135000
C7s	Control	A	7	9	202500
C7s	Control	A	7	0	0
C7s	Control	B	7	19	427500
C7s	Control	B	7	24	540000
C7s	Control	B	7	11	247500
C7s	Control	B	7	30	675000
C7s	Control	A	8	22	495000
C7s	Control	A	8	16	360000
C7s	Control	A	8	6	135000
C7s	Control	A	8	5	112500
C7s	Control	B	8	6	135000
C7s	Control	B	8	35	787500
C7s	Control	B	8	30	675000
C7s	Control	B	8	14	315000
S7a	Sexual	A	1	23	517500
S7a	Sexual	A	1	8	180000
S7a	Sexual	A	1	60	1350000
S7a	Sexual	A	1	35	787500
S7a	Sexual	B	1	20	450000
S7a	Sexual	B	1	24	540000
S7a	Sexual	B	1	16	360000
S7a	Sexual	B	1	28	630000
S7a	Sexual	B	1	24	540000
S7a	Sexual	A	2	17	382500
S7a	Sexual	A	2	24	540000
S7a	Sexual	A	2	27	607500
S7a	Sexual	A	2	28	630000
S7a	Sexual	B	2	11	247500
S7a	Sexual	B	2	28	630000
S7a	Sexual	B	2	14	315000
S7a	Sexual	B	2	8	180000
S7a	Sexual	A	3	27	607500
S7a	Sexual	A	3	30	675000
S7a	Sexual	A	3	35	787500
S7a	Sexual	A	3	24	540000
S7a	Sexual	B	3	9	202500
S7a	Sexual	B	3	6	135000
S7a	Sexual	B	3	3	67500
S7a	Sexual	B	3	3	67500
S7a	Sexual	A	4	40	900000
S7a	Sexual	A	4	47	1057500
S7a	Sexual	A	4	98	2205000
S7a	Sexual	A	4	45	1012500
S7a	Sexual	B	4	133	2992500
S7a	Sexual	B	4	28	630000
S7a	Sexual	B	4	85	1912500
S7a	Sexual	B	4	32	720000
S7a	Sexual	A	5	117	2632500
S7a	Sexual	A	5	37	832500
S7a	Sexual	A	5	58	1305000
S7a	Sexual	A	5	28	630000
S7a	Sexual	B	5	23	517500
S7a	Sexual	B	5	28	630000
S7a	Sexual	B	5	36	810000
S7a	Sexual	B	5	67	1507500
S7a	Sexual	A	6	42	945000
S7a	Sexual	A	6	43	967500
S7a	Sexual	A	6	108	2430000
S7a	Sexual	A	6	86	1935000
S7a	Sexual	B	6	54	1215000
S7a	Sexual	B	6	144	3240000
S7a	Sexual	B	6	58	1305000
S7a	Sexual	B	6	125	2812500
S7a	Sexual	A	7
S7a	Sexual	A	7	50	1125000
S7a	Sexual	A	7	65	1462500
S7a	Sexual	A	7	50	1125000
S7a	Sexual	B	7	52	1170000
S7a	Sexual	B	7	68	1530000
S7a	Sexual	B	7	91	2047500
S7a	Sexual	B	7	59	1327500
S7a	Sexual	A	8	55	1237500
S7a	Sexual	A	8	71	1597500
S7a	Sexual	A	8	23	517500
S7a	Sexual	A	8	33	742500
S7a	Sexual	B	8	39	877500
S7a	Sexual	B	8	44	990000
S7a	Sexual	B	8	99	2227500
S7a	Sexual	B	8	68	1530000
S7b	Sexual	A	1	65	1462500
S7b	Sexual	A	1	38	855000
S7b	Sexual	A	1	6	135000
S7b	Sexual	A	1	12	270000
S7b	Sexual	B	1	50	1125000
S7b	Sexual	B	1	82	1845000
S7b	Sexual	B	1	75	1687500
S7b	Sexual	A	2	20	450000
S7b	Sexual	A	2	33	742500
S7b	Sexual	A	2	25	562500
S7b	Sexual	A	2	25	562500
S7b	Sexual	B	2	11	247500
S7b	Sexual	B	2	24	540000
S7b	Sexual	B	2	5	112500
S7b	Sexual	B	2	7	157500
S7b	Sexual	A	3	30	675000
S7b	Sexual	A	3	23	517500
S7b	Sexual	A	3	9	202500
S7b	Sexual	A	3
S7b	Sexual	B	3	10	225000
S7b	Sexual	B	3	6	135000
S7b	Sexual	B	3	3	67500
S7b	Sexual	B	3	7	157500
S7b	Sexual	A	4	29	652500
S7b	Sexual	A	4	26	585000
S7b	Sexual	A	4	45	1012500
S7b	Sexual	A	4	26	585000
S7b	Sexual	B	4	68	1530000
S7b	Sexual	B	4	44	990000
S7b	Sexual	B	4	18	405000
S7b	Sexual	B	4	40	900000
S7b	Sexual	A	5	37	832500
S7b	Sexual	A	5	29	652500
S7b	Sexual	A	5	31	697500
S7b	Sexual	A	5	27	607500
S7b	Sexual	B	5	20	450000
S7b	Sexual	B	5	35	787500
S7b	Sexual	B	5	13	292500
S7b	Sexual	B	5	26	585000
S7b	Sexual	A	6	41	922500
S7b	Sexual	A	6	36	810000
S7b	Sexual	A	6	82	1845000
S7b	Sexual	A	6	3	67500
S7b	Sexual	B	6	50	1125000
S7b	Sexual	B	6	39	877500
S7b	Sexual	B	6	28	630000
S7b	Sexual	B	6	28	630000
S7b	Sexual	A	7	19	427500
S7b	Sexual	A	7	23	517500
S7b	Sexual	A	7	63	1417500
S7b	Sexual	A	7	56	1260000
S7b	Sexual	B	7	2	45000
S7b	Sexual	B	7	25	562500
S7b	Sexual	B	7	66	1485000
S7b	Sexual	B	7	35	787500
S7b	Sexual	A	8	53	1192500
S7b	Sexual	A	8	76	1710000
S7b	Sexual	A	8	75	1687500
S7b	Sexual	A	8	45	1012500
S7b	Sexual	B	8	40	900000
S7b	Sexual	B	8	12	270000
S7b	Sexual	B	8	86	1935000
S7b	Sexual	B	8	37	832500
S7c	Sexual	A	1	27	607500
S7c	Sexual	A	1	31	697500
S7c	Sexual	A	1	19	427500
S7c	Sexual	A	1	81	1822500
S7c	Sexual	B	1	7	157500
S7c	Sexual	B	1	5	112500
S7c	Sexual	B	1	13	292500
S7c	Sexual	B	1	28	630000
S7c	Sexual	A	2	59	1327500
S7c	Sexual	A	2	34	765000
S7c	Sexual	A	2	51	1147500
S7c	Sexual	A	2	28	630000
S7c	Sexual	B	2	8	180000
S7c	Sexual	B	2	25	562500
S7c	Sexual	B	2	6	135000
S7c	Sexual	B	2	5	112500
S7c	Sexual	A	3	26	585000
S7c	Sexual	A	3	47	1057500
S7c	Sexual	A	3	28	630000
S7c	Sexual	A	3	19	427500
S7c	Sexual	B	3	15	337500
S7c	Sexual	B	3	5	112500
S7c	Sexual	B	3	7	157500
S7c	Sexual	B	3	33	742500
S7c	Sexual	A	4	38	855000
S7c	Sexual	A	4	27	607500
S7c	Sexual	A	4	43	967500
S7c	Sexual	A	4	16	360000
S7c	Sexual	B	4	72	1620000
S7c	Sexual	B	4	30	675000
S7c	Sexual	B	4	45	1012500
S7c	Sexual	B	4	59	1327500
S7c	Sexual	A	5	84	1890000
S7c	Sexual	A	5	47	1057500
S7c	Sexual	A	5	29	652500
S7c	Sexual	A	5	37	832500
S7c	Sexual	B	5	35	787500
S7c	Sexual	B	5	8	180000
S7c	Sexual	B	5	42	945000
S7c	Sexual	B	5	32	720000
S7c	Sexual	A	6	106	2385000
S7c	Sexual	A	6	81	1822500
S7c	Sexual	A	6	90	2025000
S7c	Sexual	A	6	66	1485000
S7c	Sexual	B	6	46	1035000
S7c	Sexual	B	6	32	720000
S7c	Sexual	B	6	11	247500
S7c	Sexual	B	6	76	1710000
S7c	Sexual	A	7	153	3442500
S7c	Sexual	A	7	94	2115000
S7c	Sexual	A	7	130	2925000
S7c	Sexual	A	7	78	1755000
S7c	Sexual	B	7	125	2812500
S7c	Sexual	B	7	26	585000
S7c	Sexual	B	7	113	2542500
S7c	Sexual	B	7	65	1462500
S7c	Sexual	A	8	107	2407500
S7c	Sexual	A	8	63	1417500
S7c	Sexual	A	8	103	2317500
S7c	Sexual	A	8	86	1935000
S7c	Sexual	B	8	2	45000
S7c	Sexual	B	8	25	562500
S7c	Sexual	B	8	62	1395000
S7c	Sexual	B	8	104	2340000
S7d	Sexual	A	1	47	1057500
S7d	Sexual	A	1	62	1395000
S7d	Sexual	A	1	70	1575000
S7d	Sexual	A	1	71	1597500
S7d	Sexual	B	1	32	720000
S7d	Sexual	B	1	51	1147500
S7d	Sexual	B	1	97	2182500
S7d	Sexual	B	1	50	1125000
S7d	Sexual	A	2	70	1575000
S7d	Sexual	A	2	55	1237500
S7d	Sexual	A	2	128	2880000
S7d	Sexual	A	2	89	2002500
S7d	Sexual	B	2	6	135000
S7d	Sexual	B	2	11	247500
S7d	Sexual	B	2	10	225000
S7d	Sexual	B	2	8	180000
S7d	Sexual	A	3	34	765000
S7d	Sexual	A	3	38	855000
S7d	Sexual	A	3	57	1282500
S7d	Sexual	A	3	50	1125000
S7d	Sexual	B	3	9	202500
S7d	Sexual	B	3	5	112500
S7d	Sexual	B	3	9	202500
S7d	Sexual	B	3	20	450000
S7d	Sexual	A	4	111	2497500
S7d	Sexual	A	4	52	1170000
S7d	Sexual	A	4	26	585000
S7d	Sexual	A	4	31	697500
S7d	Sexual	B	4	19	427500
S7d	Sexual	B	4	30	675000
S7d	Sexual	B	4	48	1080000
S7d	Sexual	B	4	17	382500
S7d	Sexual	A	5	112	2520000
S7d	Sexual	A	5	91	2047500
S7d	Sexual	A	5	106	2385000
S7d	Sexual	A	5	80	1800000
S7d	Sexual	B	5	62	1395000
S7d	Sexual	B	5	31	697500
S7d	Sexual	B	5	56	1260000
S7d	Sexual	B	5	111	2497500
S7d	Sexual	A	6	172	3870000
S7d	Sexual	A	6	105	2362500
S7d	Sexual	A	6	135	3037500
S7d	Sexual	A	6	134	3015000
S7d	Sexual	B	6	43	967500
S7d	Sexual	B	6	76	1710000
S7d	Sexual	B	6	74	1665000
S7d	Sexual	B	6	143	3217500
S7d	Sexual	A	7	199	4477500
S7d	Sexual	A	7	134	3015000
S7d	Sexual	A	7	154	3465000
S7d	Sexual	A	7	117	2632500
S7d	Sexual	B	7	52	1170000
S7d	Sexual	B	7	68	1530000
S7d	Sexual	B	7	91	2047500
S7d	Sexual	B	7	59	1327500
S7d	Sexual	A	8	65	1462500
S7d	Sexual	A	8	196	4410000
S7d	Sexual	A	8	157	3532500
S7d	Sexual	A	8	172	3870000
S7d	Sexual	B	8	70	1575000
S7d	Sexual	B	8	125	2812500
S7d	Sexual	B	8	58	1305000
S7d	Sexual	B	8	48	1080000
