# Supplementary material for: Selection on plastic adherence leads to hyper-multicellular strains and incidental virulence in the budding yeast
Source: eLife. 2023 Nov 2;12:e81056. doi: 10.7554/eLife.81056 (PMC10764007; doi:10.7554/eLife.81056)
Supplement: Figure 1—source data 2. [file elife-81056-fig1-data2.csv]

Sample	Cycle	Treatment.Pop	Cells	CellsOnBeads
Anc	0	Ancestor	16	360000
Anc	0	Ancestor	6	135000
Anc	0	Ancestor	0	0
Anc	0	Ancestor	1	22500
A8a	1	Asexual	4	90000
A8a	1	Asexual	4	90000
A8a	1	Asexual	1	22500
A8a	1	Asexual	0	0
A8b	1	Asexual	0	0
A8b	1	Asexual	0	0
A8b	1	Asexual	3	67500
A8b	1	Asexual	0	0
A8c	1	Asexual	1	22500
A8c	1	Asexual	2	45000
A8c	1	Asexual	1	22500
A8c	1	Asexual	5	112500
A8d	1	Asexual	2	45000
A8d	1	Asexual	0	0
A8d	1	Asexual	0	0
A8d	1	Asexual	0	0
S8a	1	Sexual	0	0
S8a	1	Sexual	1	22500
S8a	1	Sexual	0	0
S8a	1	Sexual	0	0
S8b	1	Sexual	1	22500
S8b	1	Sexual	2	45000
S8b	1	Sexual	11	247500
S8b	1	Sexual	6	135000
S8c	1	Sexual	5	112500
S8c	1	Sexual	25	562500
S8c	1	Sexual	1	22500
S8c	1	Sexual	5	112500
A8a	2	Asexual	7	157500
A8a	2	Asexual	4	90000
A8a	2	Asexual	3	67500
A8a	2	Asexual	0	0
A8b	2	Asexual	0	0
A8b	2	Asexual	2	45000
A8b	2	Asexual	5	112500
A8b	2	Asexual	1	22500
A8c	2	Asexual	1	22500
A8c	2	Asexual	1	22500
A8c	2	Asexual	8	180000
A8c	2	Asexual	2	45000
A8d	2	Asexual	5	112500
A8d	2	Asexual	18	405000
A8d	2	Asexual	7	157500
A8d	2	Asexual	1	22500
S8a	2	Sexual	3	67500
S8a	2	Sexual	1	22500
S8a	2	Sexual	5	112500
S8a	2	Sexual	5	112500
S8c	2	Sexual	1	22500
S8c	2	Sexual	2	45000
S8c	2	Sexual	1	22500
S8c	2	Sexual	0	0
S8d	2	Sexual	11	247500
S8d	2	Sexual	20	450000
S8d	2	Sexual	0	0
S8d	2	Sexual	1	22500
A8a	3	Asexual	6	135000
A8a	3	Asexual	1	22500
A8a	3	Asexual	1	22500
A8a	3	Asexual	9	202500
A8b	3	Asexual	0	0
A8b	3	Asexual	6	135000
A8b	3	Asexual	0	0
A8b	3	Asexual	5	112500
A8c	3	Asexual	1	22500
A8c	3	Asexual	1	22500
A8c	3	Asexual	0	0
A8c	3	Asexual	2	45000
A8d	3	Asexual	3	67500
A8d	3	Asexual	13	292500
A8d	3	Asexual	6	135000
A8d	3	Asexual	4	90000
S8b	3	Sexual	0	0
S8b	3	Sexual	3	67500
S8b	3	Sexual	0	0
S8b	3	Sexual	4	90000
S8c	3	Sexual	16	360000
S8c	3	Sexual	0	0
S8c	3	Sexual	8	180000
S8c	3	Sexual	1	22500
S8d	3	Sexual	0	0
S8d	3	Sexual	4	90000
S8d	3	Sexual	0	0
S8d	3	Sexual	0	0
A8a	4	Asexual	100	2250000
A8a	4	Asexual	4	90000
A8a	4	Asexual	24	540000
A8a	4	Asexual	26	585000
A8b	4	Asexual	20	450000
A8b	4	Asexual	18	405000
A8b	4	Asexual	2	45000
A8b	4	Asexual	0	0
A8c	4	Asexual	11	247500
A8c	4	Asexual	8	180000
A8c	4	Asexual	7	157500
A8c	4	Asexual	6	135000
A8d	4	Asexual	2	45000
A8d	4	Asexual	4	90000
A8d	4	Asexual	8	180000
A8d	4	Asexual	6	135000
S8a	4	Sexual	25	562500
S8a	4	Sexual	30	675000
S8a	4	Sexual	0	0
S8a	4	Sexual	1	22500
S8b	4	Sexual	4	90000
S8b	4	Sexual	2	45000
S8b	4	Sexual	1	22500
S8b	4	Sexual	5	112500
S8c	4	Sexual	0	0
S8c	4	Sexual	0	0
S8c	4	Sexual	2	45000
S8c	4	Sexual	0	0
S8d	4	Sexual	1	22500
S8d	4	Sexual	8	180000
S8d	4	Sexual	7	157500
S8d	4	Sexual	2	45000
A8a	5	Asexual	2	45000
A8a	5	Asexual	4	90000
A8a	5	Asexual	2	45000
A8a	5	Asexual	2	45000
A8b	5	Asexual	3	67500
A8b	5	Asexual	3	67500
A8b	5	Asexual	5	112500
A8b	5	Asexual	7	157500
A8c	5	Asexual	2	45000
A8c	5	Asexual	5	112500
A8c	5	Asexual	0	0
A8c	5	Asexual	4	90000
A8d	5	Asexual	14	315000
A8d	5	Asexual	4	90000
A8d	5	Asexual	17	382500
A8d	5	Asexual	5	112500
S8a	5	Sexual	49	1102500
S8a	5	Sexual	41	922500
S8a	5	Sexual	7	157500
S8a	5	Sexual	13	292500
S8b	5	Sexual	6	135000
S8b	5	Sexual	15	337500
S8b	5	Sexual	13	292500
S8b	5	Sexual	22	495000
S8c	5	Sexual	12	270000
S8c	5	Sexual	3	67500
S8c	5	Sexual	8	180000
S8c	5	Sexual	16	360000
S8d	5	Sexual	3	67500
S8d	5	Sexual	4	90000
S8d	5	Sexual	8	180000
S8d	5	Sexual	5	112500
A8a	6	Asexual	12	270000
A8a	6	Asexual	36	810000
A8a	6	Asexual	23	517500
A8a	6	Asexual	20	450000
A8b	6	Asexual	18	405000
A8b	6	Asexual	12	270000
A8b	6	Asexual	15	337500
A8b	6	Asexual	17	382500
A8c	6	Asexual	9	202500
A8c	6	Asexual	16	360000
A8c	6	Asexual	14	315000
A8c	6	Asexual	14	315000
A8d	6	Asexual	14	315000
A8d	6	Asexual	7	157500
A8d	6	Asexual	33	742500
A8d	6	Asexual	42	945000
S8a	6	Sexual	100	2250000
S8a	6	Sexual	83	1867500
S8a	6	Sexual	81	1822500
S8a	6	Sexual	41	922500
S8b	6	Sexual	4	90000
S8b	6	Sexual	4	90000
S8b	6	Sexual	10	225000
S8b	6	Sexual	6	135000
S8c	6	Sexual	6	135000
S8c	6	Sexual	4	90000
S8c	6	Sexual	7	157500
S8c	6	Sexual	15	337500
S8d	6	Sexual	2	45000
S8d	6	Sexual	3	67500
S8d	6	Sexual	2	45000
S8d	6	Sexual	3	67500
A8a	7	Asexual	8	180000
A8a	7	Asexual	11	247500
A8a	7	Asexual	4	90000
A8a	7	Asexual	5	112500
A8b	7	Asexual	6	135000
A8b	7	Asexual	10	225000
A8b	7	Asexual	28	630000
A8b	7	Asexual	20	450000
A8c	7	Asexual	2	45000
A8c	7	Asexual	3	67500
A8c	7	Asexual	0	0
A8c	7	Asexual	5	112500
A8d	7	Asexual	5	112500
A8d	7	Asexual	7	157500
A8d	7	Asexual	29	652500
A8d	7	Asexual	110	2475000
S8a	7	Sexual	158	3555000
S8a	7	Sexual	122	2745000
S8a	7	Sexual	8	180000
S8a	7	Sexual	22	495000
S8b	7	Sexual	56	1260000
S8b	7	Sexual	28	630000
S8b	7	Sexual	233	5242500
S8b	7	Sexual	229	5152500
S8c	7	Sexual	155	3487500
S8c	7	Sexual	341	7672500
S8c	7	Sexual	93	2092500
S8c	7	Sexual	245	5512500
S8d	7	Sexual	5	112500
S8d	7	Sexual	7	157500
S8d	7	Sexual	0	0
S8d	7	Sexual	3	67500
A8a	8	Asexual	1	22500
A8a	8	Asexual	5	112500
A8a	8	Asexual	25	562500
A8a	8	Asexual	52	1170000
A8b	8	Asexual	25	562500
A8b	8	Asexual	3	67500
A8b	8	Asexual	10	225000
A8b	8	Asexual	9	202500
A8c	8	Asexual	20	450000
A8c	8	Asexual	4	90000
A8c	8	Asexual	0	0
A8c	8	Asexual	1	22500
A8d	8	Asexual	1	22500
A8d	8	Asexual	1	22500
A8d	8	Asexual	41	922500
A8d	8	Asexual	33	742500
S8a	8	Sexual	260	5850000
S8a	8	Sexual	691	15547500
S8a	8	Sexual	66	1485000
S8a	8	Sexual	27	607500
S8b	8	Sexual	15	337500
S8b	8	Sexual	29	652500
S8b	8	Sexual	5	112500
S8b	8	Sexual	10	225000
S8c	8	Sexual	35	787500
S8c	8	Sexual	24	540000
S8c	8	Sexual	52	1170000
S8c	8	Sexual	28	630000
S8d	8	Sexual	1	22500
S8d	8	Sexual	0	0
S8d	8	Sexual	43	967500
S8d	8	Sexual	50	1125000
A8a	9	Asexual	31	697500
A8a	9	Asexual	1	22500
A8a	9	Asexual	16	360000
A8a	9	Asexual	22	495000
A8b	9	Asexual	21	472500
A8b	9	Asexual	13	292500
A8b	9	Asexual	11	247500
A8b	9	Asexual	14	315000
A8c	9	Asexual	19	427500
A8c	9	Asexual	13	292500
A8c	9	Asexual	7	157500
A8c	9	Asexual	13	292500
A8d	9	Asexual	25	562500
A8d	9	Asexual	10	225000
A8d	9	Asexual	3	67500
A8d	9	Asexual	6	135000
S8a	9	Sexual	97	2182500
S8a	9	Sexual	86	1935000
S8a	9	Sexual	1	22500
S8a	9	Sexual	5	112500
S8b	9	Sexual	53	1192500
S8b	9	Sexual	38	855000
S8b	9	Sexual	11	247500
S8b	9	Sexual	32	720000
S8c	9	Sexual	15	337500
S8c	9	Sexual	23	517500
S8c	9	Sexual	36	810000
S8c	9	Sexual	37	832500
S8d	9	Sexual	8	180000
S8d	9	Sexual	7	157500
S8d	9	Sexual	11	247500
S8d	9	Sexual	14	315000
C8a	1	Control	5	112500
C8a	1	Control	1	22500
C8a	1	Control	5	112500
C8a	1	Control	7	157500
C8a	2	Control	3	67500
C8a	2	Control	2	45000
C8a	2	Control	10	225000
C8a	2	Control	3	67500
C8a	3	Control	0	0
C8a	3	Control	8	180000
C8a	3	Control	0	0
C8a	3	Control	0	0
C8a	4	Control	31	697500
C8a	4	Control	65	1462500
C8a	4	Control	2	45000
C8a	4	Control	0	0
C8a	5	Control	30	675000
C8a	5	Control	39	877500
C8a	5	Control	79	1777500
C8a	5	Control	75	1687500
C8a	6	Control	14	315000
C8a	6	Control	8	180000
C8a	6	Control	9	202500
C8a	6	Control	2	45000
C8a	7	Control	2	45000
C8a	7	Control	1	22500
C8a	7	Control	10	225000
C8a	7	Control	10	225000
C8a	8	Control	20	450000
C8a	8	Control	0	0
C8a	8	Control	0	0
C8a	8	Control	21	472500
C8a	9	Control	67	1507500
C8a	9	Control	27	607500
Anc	0	Ancestor	18	405000
Anc	0	Ancestor	18	405000
Anc	0	Ancestor	30	675000
Anc	0	Ancestor	10	225000
Anc	0	Ancestor	11	247500
Anc	0	Ancestor	23	517500
Anc	0	Ancestor	26	585000
Anc	0	Ancestor	27	607500
Anc	0	Ancestor	26	585000
Anc	0	Ancestor	26	585000
Anc	0	Ancestor	0	0
Anc	0	Ancestor	20	450000
CA8a	1	Control	0	0
CA8a	1	Control	2	45000
CA8a	1	Control	3	67500
CA8a	1	Control	0	0
CA8a	2	Control	0	0
CA8a	2	Control	0	0
CA8a	2	Control	2	45000
CA8a	2	Control	0	0
CA8a	3	Control	12	270000
CA8a	3	Control	2	45000
CA8a	3	Control	5	112500
CA8a	3	Control	1	22500
CA8a	4	Control	14	315000
CA8a	4	Control	12	270000
CA8a	4	Control	4	90000
CA8a	4	Control	2	45000
CA8a	5	Control	8	180000
CA8a	5	Control	1	22500
CA8a	5	Control	7	157500
CA8a	5	Control	0	0
CA8a	6	Control	3	67500
CA8a	6	Control	1	22500
CA8a	6	Control	1	22500
CA8a	6	Control	0	0
CA8a	7	Control	7	157500
CA8a	7	Control	1	22500
CA8a	7	Control	2	45000
CA8a	7	Control	1	22500
CA8a	8	Control	3	67500
CA8a	8	Control	2	45000
CA8a	8	Control	1	22500
CA8a	8	Control	0	0
CA8a	9	Control	3	67500
CA8a	9	Control	6	135000
CA8a	9	Control	3	67500
CA8a	9	Control	4	90000
CA8b	1	Control	2	45000
CA8b	1	Control	2	45000
CA8b	1	Control	1	22500
CA8b	1	Control	0	0
CA8b	2	Control	9	202500
CA8b	2	Control	3	67500
CA8b	2	Control	1	22500
CA8b	2	Control	2	45000
CA8b	3	Control	0	0
CA8b	3	Control	10	225000
CA8b	3	Control	3	67500
CA8b	3	Control	1	22500
CA8b	4	Control	2	45000
CA8b	4	Control	2	45000
CA8b	4	Control	0	0
CA8b	4	Control	0	0
CA8b	5	Control	0	0
CA8b	5	Control	3	67500
CA8b	5	Control	2	45000
CA8b	5	Control	5	112500
CA8b	6	Control	1	22500
CA8b	6	Control	3	67500
CA8b	6	Control	4	90000
CA8b	6	Control	1	22500
CA8b	7	Control	8	180000
CA8b	7	Control	2	45000
CA8b	7	Control	7	157500
CA8b	7	Control	1	22500
CA8b	8	Control	4	90000
CA8b	8	Control	2	45000
CA8b	8	Control	1	22500
CA8b	8	Control	8	180000
CA8b	9	Control	4	90000
CA8b	9	Control	6	135000
CA8b	9	Control	15	337500
CA8b	9	Control	10	225000
CA8c	1	Control	17	382500
CA8c	1	Control	8	180000
CA8c	1	Control	6	135000
CA8c	1	Control	8	180000
CA8c	2	Control	9	202500
CA8c	2	Control	3	67500
CA8c	2	Control	22	495000
CA8c	2	Control	4	90000
CA8c	3	Control	2	45000
CA8c	3	Control	4	90000
CA8c	3	Control	1	22500
CA8c	3	Control	12	270000
CA8c	4	Control	6	135000
CA8c	4	Control	3	67500
CA8c	4	Control	0	0
CA8c	4	Control	1	22500
CA8c	5	Control	12	270000
CA8c	5	Control	8	180000
CA8c	5	Control	5	112500
CA8c	5	Control	3	67500
CA8c	6	Control	6	135000
CA8c	6	Control	0	0
CA8c	6	Control	1	22500
CA8c	6	Control	4	90000
CA8c	7	Control	2	45000
CA8c	7	Control	1	22500
CA8c	7	Control	3	67500
CA8c	7	Control	5	112500
CA8c	8	Control	0	0
CA8c	8	Control	9	202500
CA8c	8	Control	0	0
CA8c	8	Control	3	67500
CA8c	9	Control	4	90000
CA8c	9	Control	0	0
CA8c	9	Control	8	180000
CA8c	9	Control	11	247500
CS8a	1	Control	1	22500
CS8a	1	Control	2	45000
CS8a	1	Control	0	0
CS8a	1	Control	0	0
CS8a	2	Control	6	135000
CS8a	2	Control	2	45000
CS8a	2	Control	19	427500
CS8a	2	Control	16	360000
CS8a	3	Control	5	112500
CS8a	3	Control	0	0
CS8a	3	Control	2	45000
CS8a	3	Control	0	0
CS8a	4	Control	9	202500
CS8a	4	Control	4	90000
CS8a	4	Control	0	0
CS8a	4	Control	5	112500
CS8a	5	Control	1	22500
Cs8a	5	Control	3	67500
Cs8a	5	Control	5	112500
Cs8a	5	Control	0	0
CS8a	6	Control	2	45000
CS8a	6	Control	2	45000
CS8a	6	Control	8	180000
CS8a	6	Control	1	22500
CS8a	7	Control	5	112500
CS8a	7	Control	3	67500
CS8a	7	Control	6	135000
CS8a	7	Control	2	45000
CS8a	8	Control	9	202500
CS8a	8	Control	7	157500
CS8a	8	Control	20	450000
CS8a	8	Control	12	270000
CS8a	9	Control	13	292500
CS8a	9	Control	7	157500
CS8a	9	Control	2	45000
CS8a	9	Control	1	22500
CS8b	1	Control	3	67500
CS8b	1	Control	11	247500
CS8b	1	Control	12	270000
CS8b	1	Control	2	45000
CS8b	2	Control	0	0
CS8b	2	Control	2	45000
CS8b	2	Control	0	0
CS8b	2	Control	1	22500
CS8b	3	Control	4	90000
CS8b	3	Control	3	67500
CS8b	3	Control	0	0
CS8b	3	Control	0	0
CS8b	4	Control	0	0
CS8b	4	Control	4	90000
CS8b	4	Control	2	45000
CS8b	4	Control	0	0
Cs8b	5	Control	0	0
Cs8b	5	Control	2	45000
Cs8b	5	Control	0	0
Cs8b	5	Control	1	22500
CS8b	6	Control	0	0
CS8b	6	Control	0	0
CS8b	6	Control	17	382500
CS8b	6	Control	5	112500
CS8b	7	Control	7	157500
CS8b	7	Control	10	225000
CS8b	7	Control	1	22500
CS8b	7	Control	3	67500
CS8b	8	Control	0	0
CS8b	8	Control	27	607500
CS8b	8	Control	9	202500
CS8b	8	Control	12	270000
CS8b	9	Control	3	67500
CS8b	9	Control	7	157500
CS8b	9	Control	0	0
CS8b	9	Control	0	0
CS8c	1	Control	6	135000
CS8c	1	Control	1	22500
CS8c	1	Control	1	22500
CS8c	1	Control	12	270000
CS8c	2	Control	1	22500
CS8c	2	Control	0	0
CS8c	2	Control	5	112500
CS8c	2	Control	2	45000
CS8c	3	Control	4	90000
CS8c	3	Control	1	22500
CS8c	3	Control	11	247500
CS8c	3	Control	2	45000
CS8c	4	Control	8	180000
CS8c	4	Control	1	22500
CS8c	4	Control	2	45000
CS8c	4	Control	4	90000
Cs8c	5	Control	2	45000
Cs8c	5	Control	1	22500
Cs8c	5	Control	1	22500
Cs8c	5	Control	3	67500
CS8c	6	Control	4	90000
CS8c	6	Control	6	135000
CS8c	6	Control	27	607500
CS8c	6	Control	0	0
CS8c	7	Control	0	0
CS8c	7	Control	3	67500
CS8c	7	Control	15	337500
CS8c	7	Control	8	180000
CS8c	8	Control	21	472500
CS8c	8	Control	12	270000
CS8c	8	Control	0	0
CS8c	8	Control	2	45000
CS8c	9	Control	2	45000
CS8c	9	Control	5	112500
CS8c	9	Control	0	0
CS8c	9	Control	1	22500
