# Supplementary material for: Selection on plastic adherence leads to hyper-multicellular strains and incidental virulence in the budding yeast
Source: eLife. 2023 Nov 2;12:e81056. doi: 10.7554/eLife.81056 (PMC10764007; doi:10.7554/eLife.81056)
Supplement: Figure 2—source data 1. [file elife-81056-fig2-data1.csv]

Sample	Treatment	Cycle	PSH	FlorScore	CCM_Score	Normalized.Fluorescence	Raw.Fluorescence	OD	Population
A7a-2-1	Asexual	2	30	1	2.666666667	1.844748466	0.811333333	0.439807024	A7a
A7a-2-10	Asexual	2	30.33333333	0	2	1.229951879	0.675666667	0.549343985	A7a
A7a-2-2	Asexual	2	33.33333333	0	3	3.018774058	0.914333333	0.302882334	A7a
A7a-2-3	Asexual	2	27.66666667	1	3	1.59776361	0.896	0.560783832	A7a
A7a-2-4	Asexual	2	19.66666667	1	3.666666667	1.803564969	1.059333333	0.587355239	A7a
A7a-2-5	Asexual	2	28.66666667	0	3.333333333	3.329214903	0.848333333	0.254814831	A7a
A7a-2-6	Asexual	2	28	0	3	1.422642327	0.909	0.638951887	A7a
A7a-2-7	Asexual	2	31.66666667	0	3	2.783718524	0.839	0.301395415	A7a
A7a-2-8	Asexual	2	32.33333333	0	3	2.102008416	0.907333333	0.431650666	A7a
A7a-2-9	Asexual	2	28.66666667	0	2	0.815214484	0.551333333	0.676304634	A7a
A7a-4-1	Asexual	4	27	3	2				A7a
A7a-4-10	Asexual	4	19.66666667	1	2	1.201070716	0.752333333	0.626385543	A7a
A7a-4-2	Asexual	4	21	1	2	1.609882842	0.790666667	0.491133048	A7a
A7a-4-3	Asexual	4	29.66666667	0	1.666666667	1.329106068	0.811	0.610184559	A7a
A7a-4-4	Asexual	4	24.33333333	1	2	1.293789643	0.794	0.613701002	A7a
A7a-4-5	Asexual	4	20.33333333	1	2	1.671589056	0.832	0.497729988	A7a
A7a-4-6	Asexual	4	19	0	2.333333333	1.369212528	0.813666667	0.594258853	A7a
A7a-4-7	Asexual	4	17.66666667	0	2	1.411450344	0.824	0.583796662	A7a
A7a-4-8	Asexual	4	20.66666667	3	2	4.336180124	1.117	0.2576	A7a
A7a-4-9	Asexual	4	28.66666667	3	2	4.87866715	1.347	0.2761	A7a
A7a-6-1	Asexual	6	18.66666667	1	2	1.469856504	0.839666667	0.571257578	A7a
A7a-6-10	Asexual	6	21	0	3	1.365530856	0.866	0.634185596	A7a
A7a-6-2	Asexual	6	21.66666667	0	2	1.258236077	0.824666667	0.655414896	A7a
A7a-6-3	Asexual	6	29	0	3	1.266616016	0.871666667	0.688185414	A7a
A7a-6-4	Asexual	6	22.33333333	0	3	1.214287064	0.852666667	0.702195298	A7a
A7a-6-5	Asexual	6	29.33333333	1	3	1.24141966	0.79	0.636368204	A7a
A7a-6-6	Asexual	6	32.66666667	0	3	1.202570804	0.812666667	0.675774486	A7a
A7a-6-7	Asexual	6	20.33333333	1	2	1.532154927	0.945666667	0.617213475	A7a
A7a-6-8	Asexual	6	27	0	3	1.27535685	0.831333333	0.651843704	A7a
A7a-6-9	Asexual	6	27.66666667	1	3	1.408763335	0.858666667	0.60951804	A7a
A7a-8-1	Asexual	8	33.66666667	1	3.666666667	2.88039717	0.789	0.273920558	A7a
A7a-8-10	Asexual	8	28.33333333	1	3	2.06184331	0.749	0.363267178	A7a
A7a-8-2	Asexual	8	29.33333333	1	3.333333333	1.148287653	0.727	0.633116622	A7a
A7a-8-3	Asexual	8	31.33333333	1	4	1.454048846	0.8355	0.57460243	A7a
A7a-8-4	Asexual	8	28.66666667	1	2.666666667	1.615974836	0.6825	0.422345686	A7a
A7a-8-5	Asexual	8	26.33333333	1	3	1.891734715	0.813	0.429764276	A7a
A7a-8-6	Asexual	8	26	1	2.666666667	2.089171975	0.8285	0.396568597	A7a
A7a-8-7	Asexual	8	28.66666667	1	2.666666667	1.46414699	0.61	0.416624836	A7a
A7a-8-8	Asexual	8	29.66666667	1	3	1.991043327	0.8695	0.436705715	A7a
A7a-8-9	Asexual	8	29.5	1	3	2.897763578	0.760666667	0.262501286	A7a
A7b-2-1	Asexual	2	19.66666667	1	3	2.193317375	0.868333333	0.395899537	A7b
A7b-2-10	Asexual	2	23.66666667	1	3	2.268546171	0.683666667	0.301367755	A7b
A7b-2-2	Asexual	2	34.66666667	0	2.666666667	1.006503034	0.697333333	0.69282785	A7b
A7b-2-3	Asexual	2	27.66666667	0	3	1.287142194	0.700333333	0.544099429	A7b
A7b-2-4	Asexual	2	26.66666667	2	3	2.072570513	0.977666667	0.471716963	A7b
A7b-2-5	Asexual	2	25.66666667	0	2.666666667	1.872201399	0.733333333	0.391695751	A7b
A7b-2-6	Asexual	2	27.66666667	0	2.666666667	1.855106241	0.816666667	0.44022636	A7b
A7b-2-7	Asexual	2	29.66666667	1	3	1.000252424	0.644	0.64383748	A7b
A7b-2-8	Asexual	2	31.33333333	0	2	1.335497962	0.767333333	0.574567206	A7b
A7b-2-9	Asexual	2	29	1	2	1.659192248	0.823	0.496024497	A7b
A7b-4-1	Asexual	4	17	2	4	2.856535587	1.364	0.47750149	A7b
A7b-4-10	Asexual	4	12.5	1	4	2.002400726	0.962666667	0.480756251	A7b
A7b-4-2	Asexual	4	14.66666667	1	4	2.347852898	1.018666667	0.433871589	A7b
A7b-4-3	Asexual	4	13.5	1	4	1.324751907	0.963	0.726928563	A7b
A7b-4-4	Asexual	4	22.66666667	1	4	3.143902116	1.682666667	0.535215985	A7b
A7b-4-5	Asexual	4	15.33333333	1	4	2.237004618	1.197333333	0.535239545	A7b
A7b-4-6	Asexual	4	13.33333333	1	5	2.430306953	1.433333333	0.589774609	A7b
A7b-4-7	Asexual	4	11.33333333	2	4	4.051604645	1.967666667	0.485651202	A7b
A7b-4-8	Asexual	4	16.33333333	2	4	2.240510334	1.111333333	0.496017946	A7b
A7b-4-9	Asexual	4	16	2	4	2.222713909	1.014333333	0.456349028	A7b
A7b-6-1	Asexual	6	11.33333333	2	4	3.054704294	1.400333333	0.458418622	A7b
A7b-6-10	Asexual	6	14.5	2	4.333333333	5.248026796	2.301333333	0.438514021	A7b
A7b-6-2	Asexual	6	11.33333333	2	4	3.707660296	1.731	0.466871251	A7b
A7b-6-3	Asexual	6	10.66666667	1	4	2.942063463	1.346333333	0.457615327	A7b
A7b-6-4	Asexual	6	9.666666667	2	3.666666667	2.144629079	0.978333333	0.45617834	A7b
A7b-6-5	Asexual	6	10.66666667	1	3.666666667	2.356483772	1.205	0.511355102	A7b
A7b-6-6	Asexual	6	17.66666667	2	3.666666667	2.060460304	1.207666667	0.586114988	A7b
A7b-6-7	Asexual	6	12.33333333	2	3.666666667	2.680246105	1.500666667	0.559898833	A7b
A7b-6-8	Asexual	6	14	2	4	2.012351992	1.057333333	0.525421664	A7b
A7b-6-9	Asexual	6	10.33333333	2	4	2.424962878	1.2	0.494852936	A7b
A7b-8-1	Asexual	8	27.66666667	1	3.333333333	1.704106113	0.7245	0.425149581	A7b
A7b-8-10	Asexual	8	17.66666667	2	3.666666667	1.414103354	0.963333333	0.68123262	A7b
A7b-8-2	Asexual	8	29	0	2.666666667	1.801112501	0.786666667	0.436767091	A7b
A7b-8-3	Asexual	8	19.66666667	2	4	2.161560493	1.122666667	0.519377862	A7b
A7b-8-4	Asexual	8	13.5	2	3.666666667	1.925606931	0.921	0.478290759	A7b
A7b-8-5	Asexual	8	11	2	4	1.556972093	1.109333333	0.712494038	A7b
A7b-8-6	Asexual	8	11	2	4	5.881909259	2.876	0.48895688	A7b
A7b-8-7	Asexual	8	16.33333333	2	4	3.474489042	1.379	0.396892891	A7b
A7b-8-8	Asexual	8	23	2	4	4.603611166	2.139666667	0.464780058	A7b
A7b-8-9	Asexual	8	26.66666667	2	4	2.081934633	0.941	0.451983451	A7b
A7c-2-1	Asexual	2	29.66666667	0	2	1.632246198	0.732666667	0.448870194	A7c
A7c-2-10	Asexual	2	24.66666667	1	3	1.129717625	0.758	0.670964127	A7c
A7c-2-2	Asexual	2	22.66666667	2	3.333333333	1.770816055	0.812666667	0.458922125	A7c
A7c-2-3	Asexual	2	36.66666667	0	3	1.150662019	0.776333333	0.674684069	A7c
A7c-2-4	Asexual	2	24.33333333	0	2	2.133236789	0.744333333	0.34892204	A7c
A7c-2-5	Asexual	2	28.33333333	1	3		0.806666667	#DIV/0!	A7c
A7c-2-6	Asexual	2	21.33333333	1	3.333333333	2.558627624	0.830666667	0.324653208	A7c
A7c-2-7	Asexual	2	19	0	2.333333333	1.3185638	0.818	0.620371953	A7c
A7c-2-8	Asexual	2	18	0	2	2.192165341	0.761666667	0.347449461	A7c
A7c-2-9	Asexual	2	29	0	2	1.021566773	0.766333333	0.750154912	A7c
A7c-4-1	Asexual	4	24.33333333	0	2	0.985978417	0.789	0.800220356	A7c
A7c-4-10	Asexual	4	26.66666667	0	2	1.085756785	0.885666667	0.815713684	A7c
A7c-4-2	Asexual	4	23.33333333	0	2	0.855626122	0.744333333	0.869928248	A7c
A7c-4-3	Asexual	4	24.66666667	0	2	0.978691194	0.783	0.800048069	A7c
A7c-4-4	Asexual	4	23.66666667	0	2	0.945232371	0.757	0.800861273	A7c
A7c-4-5	Asexual	4	22	0	2.666666667	1.054766488	0.800333333	0.758777741	A7c
A7c-4-6	Asexual	4	27.33333333	0	2	0.889587884	0.731666667	0.822478229	A7c
A7c-4-7	Asexual	4	23	0	2	1.120526062	0.828333333	0.739236115	A7c
A7c-4-8	Asexual	4	19.66666667	0	2	0.744274409	0.689333333	0.926181694	A7c
A7c-4-9	Asexual	4	26.33333333	0	2	0.904740464	0.82	0.906337268	A7c
A7c-6-1	Asexual	6	33.66666667	0	2	1.265552108	0.879333333	0.69482191	A7c
A7c-6-10	Asexual	6	21.33333333	0	2	0.995347269	0.702	0.705281485	A7c
A7c-6-2	Asexual	6	26.33333333	0	2	1.127285089	0.763333333	0.677143112	A7c
A7c-6-3	Asexual	6	26.66666667	0	2	1.211425577	0.864333333	0.713484468	A7c
A7c-6-4	Asexual	6	23	0	2.333333333	1.037680106	0.722666667	0.696425288	A7c
A7c-6-5	Asexual	6	24.33333333	0	2.333333333	1.115621677	0.774	0.693783579	A7c
A7c-6-6	Asexual	6	24	0	2	1.06967556	0.714	0.667492113	A7c
A7c-6-7	Asexual	6	24	0	2	1.077111645	0.725666667	0.673715367	A7c
A7c-6-8	Asexual	6	23.66666667	0	2	1.066487013	0.761	0.713557681	A7c
A7c-6-9	Asexual	6	31.66666667	0	2	1.16716799	0.919	0.787375946	A7c
A7c-8-1	Asexual	8	24.33333333	0	2	1.326052781	0.801666667	0.6045511	A7c
A7c-8-10	Asexual	8	24.33333333	0	2	1.025828304	0.720333333	0.702196781	A7c
A7c-8-2	Asexual	8	24.5	0	2.333333333	1.208863547	0.708	0.585674042	A7c
A7c-8-3	Asexual	8	26.33333333	0	2	1.250438079	0.711333333	0.568867299	A7c
A7c-8-4	Asexual	8	21.33333333	0	2.333333333	1.410206916	0.785	0.5566559	A7c
A7c-8-5	Asexual	8	27.33333333	0	2.333333333	1.041965921	0.724666667	0.6954802	A7c
A7c-8-6	Asexual	8	23	0	2	1.3070791	0.826666667	0.632453435	A7c
A7c-8-7	Asexual	8	22	1	2	1.227771753	0.839	0.68335177	A7c
A7c-8-8	Asexual	8	24	0	2	1.115127362	0.815666667	0.73145606	A7c
A7c-8-9	Asexual	8	21.66666667	0	2	1.145984993	0.815333333	0.711469468	A7c
A7d-2-1	Asexual	2	20.33333333	0	3	1.192665879	0.762666667	0.63946381	A7d
A7d-2-10	Asexual	2	39	2	3.333333333	3.706203785	1.030666667	0.278092282	A7d
A7d-2-2	Asexual	2	21.33333333	0	3	1.502345938	0.901333333	0.599950591	A7d
A7d-2-3	Asexual	2	31.33333333	1	2.666666667		0.582	#DIV/0!	A7d
A7d-2-4	Asexual	2	19	1	3	1.497983501	0.769	0.513356789	A7d
A7d-2-5	Asexual	2	35.33333333	1	2.666666667	1.601185768	0.761666667	0.475689131	A7d
A7d-2-6	Asexual	2	31	0	2.333333333	3.288989311	0.787666667	0.239485931	A7d
A7d-2-7	Asexual	2	29.33333333	0	3	1.475135932	0.873666667	0.592261803	A7d
A7d-2-8	Asexual	2	28.33333333	0	2	1.330902533	0.742333333	0.557766865	A7d
A7d-2-9	Asexual	2	30.66666667	1	3.333333333	1.387157509	0.790333333	0.569750247	A7d
A7d-4-1	Asexual	4	25.33333333	0	2	1.058881804	0.815333333	0.769994658	A7d
A7d-4-10	Asexual	4	23	0	2	0.946572053	0.741666667	0.783529014	A7d
A7d-4-2	Asexual	4	23.66666667	1	3.666666667	1.179429408	0.834666667	0.707686837	A7d
A7d-4-3	Asexual	4	20	1	4.333333333	1.209497536	0.705333333	0.583162274	A7d
A7d-4-4	Asexual	4	26	0	2	1.142946464	0.896333333	0.784230374	A7d
A7d-4-5	Asexual	4	27	0	2	0.901485477	0.653	0.724359978	A7d
A7d-4-6	Asexual	4	21	0	2	1.035778465	0.743	0.71733486	A7d
A7d-4-7	Asexual	4	24.33333333	0	2	0.954522281	0.716666667	0.750811879	A7d
A7d-4-8	Asexual	4	31.66666667	0	2	1.053214072	0.757666667	0.719385249	A7d
A7d-4-9	Asexual	4	26	0	3	0.950395119	0.630333333	0.663232923	A7d
A7d-6-1	Asexual	6	20.33333333	0	3	1.339892646	0.864333333	0.645076556	A7d
A7d-6-10	Asexual	6	22.66666667	0	3	1.751654704	0.872333333	0.498005304	A7d
A7d-6-2	Asexual	6	24	0	3.666666667	1.286862554	0.931333333	0.723724014	A7d
A7d-6-3	Asexual	6	22	1	4	2.570356733	0.91	0.354036461	A7d
A7d-6-4	Asexual	6	21.66666667	1	3.666666667	2.233270101	0.728333333	0.326128637	A7d
A7d-6-5	Asexual	6	18.66666667	1	4	2.095083898	0.750333333	0.358139993	A7d
A7d-6-6	Asexual	6	21.33333333	1	4	1.831566655	0.815666667	0.445338238	A7d
A7d-6-7	Asexual	6	21.33333333	0	4.666666667	2.799676502	0.808333333	0.288723834	A7d
A7d-6-8	Asexual	6	24	1	4	2.070156255	0.968	0.467597553	A7d
A7d-6-9	Asexual	6	23.66666667	0	3.666666667	2.201949884	0.734666667	0.333643682	A7d
A7d-8-1	Asexual	8	22	1	3	1.498629702	0.755666667	0.504238416	A7d
A7d-8-10	Asexual	8	22	1	5	1.682082596	0.793	0.471439394	A7d
A7d-8-2	Asexual	8	24	1	3.666666667	1.661207835	0.895	0.538764615	A7d
A7d-8-3	Asexual	8	22.66666667	0	5	1.259473997	0.726666667	0.576960436	A7d
A7d-8-4	Asexual	8	25	1	4.666666667	1.448327697	0.735	0.507481837	A7d
A7d-8-5	Asexual	8	23.66666667	1	4.666666667	1.259181268	0.719333333	0.571270675	A7d
A7d-8-6	Asexual	8	21.33333333	1	4	1.493769162	0.841	0.56300533	A7d
A7d-8-7	Asexual	8	20.33333333	1	4.666666667	1.292047797	0.73	0.564994578	A7d
A7d-8-8	Asexual	8	22	1	4.333333333	1.185785749	0.738333333	0.622653235	A7d
A7d-8-9	Asexual	8	19.66666667	1	4	1.21069494	0.683	0.564138808	A7d
Anc-7-1	Ancestor	0	25	0	2	1.072796341	0.69	0.643178927	Anc
Anc-7-10	Ancestor	0	25.66666667	0	2	1.309715084	0.687333333	0.524796073	Anc
Anc-7-11	Ancestor	0	29	0	2	1.342627255	0.766	0.570523202	Anc
Anc-7-12	Ancestor	0	25.66666667	0	2	1.37113449	0.855	0.623571215	Anc
Anc-7-13	Ancestor	0	26	0	2	1.019104666	0.686	0.673139887	Anc
Anc-7-14	Ancestor	0	26.66666667	0	2	0.957715566	0.644666667	0.67312957	Anc
Anc-7-15	Ancestor	0	26.33333333	0	2	1.196292565	0.739	0.617741865	Anc
Anc-7-16	Ancestor	0	34.33333333	0	2	1.10577973	0.657	0.59415088	Anc
Anc-7-17	Ancestor	0	28.33333333	0	2	1.189469695	0.739666667	0.621845744	Anc
Anc-7-18	Ancestor	0	27	0	2	1.224735144	0.718666667	0.586793537	Anc
Anc-7-19	Ancestor	0	23.66666667	0	2	1.086096072	0.68	0.626095626	Anc
Anc-7-2	Ancestor	0	30	0	2	1.527977212	0.905666667	0.592722627	Anc
Anc-7-20	Ancestor	0		0	2	1.045943188	0.630666667	0.602964553	Anc
Anc-7-21	Ancestor	0		0	2	1.427604104	0.826666667	0.579058763	Anc
Anc-7-22	Ancestor	0		0	2	1.147039531	0.755333333	0.658506802	Anc
Anc-7-23	Ancestor	0		0	2	1.164020274	0.703	0.603941371	Anc
Anc-7-24	Ancestor	0		0	2	1.143203001	0.733666667	0.641764119	Anc
Anc-7-25	Ancestor	0		0	2	1.318649351	0.845333333	0.641059985	Anc
Anc-7-26	Ancestor	0		0	2	1.236256343	0.753333333	0.609366607	Anc
Anc-7-27	Ancestor	0		0	2	1.017652015	0.657333333	0.645931343	Anc
Anc-7-28	Ancestor	0		0	2	1.02879815	0.696666667	0.677165552	Anc
Anc-7-29	Ancestor	0		0	2	1.080678117	0.697333333	0.645273854	Anc
Anc-7-3	Ancestor	0	24.5	0	1	0.93873483	0.672	0.715857107	Anc
Anc-7-30	Ancestor	0		0	2	1.124581007	0.721	0.641127669	Anc
Anc-7-31	Ancestor	0		0	2	1.171268442	0.725333333	0.619271643	Anc
Anc-7-32	Ancestor	0		0	2	1.295092099	0.777333333	0.600214713	Anc
Anc-7-33	Ancestor	0		0	1.666666667	1.064792214	0.7	0.657405258	Anc
Anc-7-34	Ancestor	0		0	1.666666667	1.226781088	0.765666667	0.624126565	Anc
Anc-7-35	Ancestor	0		0	1.333333333	1.228680489	0.813333333	0.661956742	Anc
Anc-7-36	Ancestor	0		0	1	1.122710601	0.743	0.661791204	Anc
Anc-7-37	Ancestor	0		0	1.333333333	1.206519452	0.836	0.692902214	Anc
Anc-7-38	Ancestor	0		0	1	2.204857955	1.502	0.681223022	Anc
Anc-7-39	Ancestor	0		0	1	1.055866237	0.653666667	0.619080944	Anc
Anc-7-4	Ancestor	0	32	0	2	1.149294205	0.799666667	0.695789349	Anc
Anc-7-40	Ancestor	0		0	1	1.243142004	0.761	0.612158545	Anc
Anc-7-5	Ancestor	0	29.5	0	2	0.950305557	0.621333333	0.653824792	Anc
Anc-7-6	Ancestor	0	30	0	2	1.069917086	0.733666667	0.685722919	Anc
Anc-7-7	Ancestor	0	31	0	2	1.012196755	0.685333333	0.677075213	Anc
Anc-7-8	Ancestor	0	43	0	2	1.215315753	0.822666667	0.676915991	Anc
Anc-7-9	Ancestor	0	28	0	2	1.0451593	0.666	0.637223436	Anc
C7a-2-1	Control	2	26.33333333	0	1.666666667	1.315098333	0.798	0.606798731	C7a
C7a-2-10	Control	2	16	0	1	1.2328485	0.786666667	0.638088676	C7a
C7a-2-2	Control	2	24	0	2	1.095674167	0.654	0.59689278	C7a
C7a-2-3	Control	2	26.33333333	0	2	1.503964185	0.857	0.569827399	C7a
C7a-2-4	Control	2	34	1	3.666666667	2.958782596	0.950666667	0.321303319	C7a
C7a-2-5	Control	2	24.33333333	0	2	1.245957347	0.793	0.636458384	C7a
C7a-2-6	Control	2	17	0	1	1.184780444	0.755	0.637248871	C7a
C7a-2-7	Control	2	22.66666667	1	2.333333333	1.032918747	0.682333333	0.660587616	C7a
C7a-2-8	Control	2	25	0	2	1.103191926	0.668	0.605515672	C7a
C7a-2-9	Control	2	22.5	0	1	1.040861041	0.637	0.611993316	C7a
C7a-4-1	Control	4	19.33333333	0	1	0.890959394	0.748	0.839544434	C7a
C7a-4-10	Control	4	23	0	2	1.363723448	0.966	0.708354763	C7a
C7a-4-2	Control	4	19.33333333	1	2	1.05939162	0.765666667	0.722741857	C7a
C7a-4-3	Control	4	18.66666667	0	1	1.094580176	0.929	0.848727229	C7a
C7a-4-4	Control	4	19	0	1	0.981075943	0.834333333	0.850426859	C7a
C7a-4-5	Control	4	20.66666667	0	1	0.873495672	0.765	0.875791403	C7a
C7a-4-6	Control	4	17.33333333	0	1	0.855841364	0.765666667	0.894636202	C7a
C7a-4-7	Control	4	18	0	1	1.015605811	0.813333333	0.800835643	C7a
C7a-4-8	Control	4	22.66666667	0	2	1.468424826	0.916333333	0.624024681	C7a
C7a-4-9	Control	4	15.66666667	0	1	0.946984996	0.824666667	0.870833931	C7a
C7a-6-1	Control	6	11.66666667	0	1	1.256192223	0.7225	0.57515083	C7a
C7a-6-10	Control	6	17.5	0	1	1.20733374	0.867	0.718111299	C7a
C7a-6-2	Control	6	21.33333333	0	2	1.544962862	0.847	0.548233243	C7a
C7a-6-3	Control	6	20.33333333	1	2	0.91204292	0.7155	0.784502554	C7a
C7a-6-4	Control	6	13.33333333	0	2	1.099042934	0.7525	0.684686628	C7a
C7a-6-5	Control	6	31.33333333	0	2.333333333	0.843290214	0.779333333	0.924157923	C7a
C7a-6-6	Control	6	26.33333333	0	2	1.988895499	0.958	0.481674377	C7a
C7a-6-7	Control	6	25.33333333	0	1	1.106488501	0.767	0.693183887	C7a
C7a-6-8	Control	6	21	0	2	1.231562269	0.877333333	0.712374319	C7a
C7a-6-9	Control	6	15	0	1	1.115285184	0.730666667	0.655138863	C7a
C7a-8-1	Control	8	19	0	2	1.208771432	0.754333333	0.624049604	C7a
C7a-8-10	Control	8	21	0	2	1.224177157	0.757333333	0.618646843	C7a
C7a-8-2	Control	8	21.33333333	0	2	1.312462762	0.777333333	0.592270772	C7a
C7a-8-3	Control	8	18.33333333	0	2.333333333	1.458749234	0.855666667	0.586575572	C7a
C7a-8-4	Control	8	19	0	2	1.103057755	0.689	0.624627312	C7a
C7a-8-5	Control	8	16.33333333	0	2	1.230251815	0.732333333	0.595271085	C7a
C7a-8-6	Control	8	16	0	2	1.572753623	0.736333333	0.46818098	C7a
C7a-8-7	Control	8	22.33333333	0	2	0.958939419	0.662333333	0.690693614	C7a
C7a-8-8	Control	8	19.33333333	0	2	1.130932167	0.655333333	0.579462988	C7a
C7a-8-9	Control	8	21	0	2	1.360915552	0.817333333	0.600576084	C7a
C7s-2-1	Control	2	26	0	1	1.475013014	0.782666667	0.530616787	C7s
C7s-2-10	Control	2	22.66666667	0	2	0.875160263	0.723333333	0.826515284	C7s
C7s-2-2	Control	2	23.33333333	0	2	1.053707444	0.704666667	0.668749823	C7s
C7s-2-3	Control	2	26	0	2	1.384645533	0.744666667	0.537803105	C7s
C7s-2-4	Control	2	16.5	0	1.333333333	2.602496725	0.768333333	0.295229318	C7s
C7s-2-5	Control	2	14	0	1.666666667	1.441642102	0.708	0.491106634	C7s
C7s-2-6	Control	2	28.33333333	0	1.333333333	0.900896292	0.613333333	0.680803483	C7s
C7s-2-7	Control	2	18.33333333	0	1.666666667	1.277706155	0.652333333	0.510550357	C7s
C7s-2-8	Control	2	18.33333333	0	2	1.052145526	0.644666667	0.612716256	C7s
C7s-2-9	Control	2	23.33333333	0	4	1.086682055	0.768	0.706738458	C7s
C7s-4-1	Control	4	16.66666667	0	1.666666667	1.070902998	0.785666667	0.73364877	C7s
C7s-4-10	Control	4	25	0	2	2.73662492	0.855	0.312428639	C7s
C7s-4-2	Control	4	16	0	2	1.389260754	1.005	0.723406313	C7s
C7s-4-3	Control	4	20.33333333	0	2	1.224125841	0.880333333	0.719152642	C7s
C7s-4-4	Control	4	26	1	2.666666667	1.787051939	0.702333333	0.393012267	C7s
C7s-4-5	Control	4	22	0	2.333333333	0.872945487	0.717666667	0.822120828	C7s
C7s-4-6	Control	4	18.66666667	0	1.666666667	0.940044737	0.771666667	0.820882918	C7s
C7s-4-7	Control	4	39.66666667	1	3	2.642499129	0.828	0.313339744	C7s
C7s-4-8	Control	4	21.66666667	0	2	1.235894736	0.784666667	0.634897653	C7s
C7s-4-9	Control	4	23.33333333	0	2	1.285524336	0.909333333	0.707363764	C7s
C7s-6-1	Control	6	17.33333333	1	2		0.903333333	#DIV/0!	C7s
C7s-6-10	Control	6	18.33333333	0	1.333333333	1.849651253	0.7475	0.404130237	C7s
C7s-6-2	Control	6	15	0	1	1.332876706	0.850333333	0.637968485	C7s
C7s-6-3	Control	6	17	0	2	2.350644473	0.801	0.340757613	C7s
C7s-6-4	Control	6	18	0	1	1.560272115	0.745666667	0.47790809	C7s
C7s-6-5	Control	6	19.5	1	2	2.804431584	0.909	0.324129854	C7s
C7s-6-6	Control	6	13.5	0	2	1.31942384	0.79	0.598746192	C7s
C7s-6-7	Control	6	12	0	2	1.294389412	0.803	0.620369722	C7s
C7s-6-8	Control	6	16	1	1	1.127745448	0.708666667	0.628392399	C7s
C7s-6-9	Control	6	13.66666667	0	1	1.36873933	0.792	0.578634648	C7s
C7s-8-1	Control	8	17	0	1.333333333	1.141264605	0.808666667	0.708570706	C7s
C7s-8-10	Control	8	22.33333333	0	2	2.253355021	0.794333333	0.3525114	C7s
C7s-8-2	Control	8	22.33333333	0	1	1.165345205	0.806666667	0.692212628	C7s
C7s-8-3	Control	8	19.33333333	0	1	1.227137677	0.82	0.66822168	C7s
C7s-8-4	Control	8	15.66666667	1	2	1.206510586	0.824333333	0.683237547	C7s
C7s-8-5	Control	8	18.33333333	0	1	1.204175501	0.774333333	0.643040265	C7s
C7s-8-6	Control	8	14.33333333	1	2	1.735353454	0.661666667	0.381286398	C7s
C7s-8-7	Control	8	27	0	2	0.96988243	0.709	0.731016439	C7s
C7s-8-8	Control	8	26.33333333	0	1	1.173578171	0.766333333	0.652988742	C7s
C7s-8-9	Control	8	31	0	2	1.244669141	0.811	0.65157878	C7s
S7a-2-1	Sexual	2	29	1	2	1.45521158	0.573666667	0.394215298	S7a
S7a-2-10	Sexual	2	28	0	2	0.842914915	0.604666667	0.717351961	S7a
S7a-2-2	Sexual	2	28.66666667	0	2.333333333	1.436394076	0.807	0.561823537	S7a
S7a-2-3	Sexual	2	27.33333333	0	2	0.918659648	0.643	0.699932779	S7a
S7a-2-4	Sexual	2	34	0	2.666666667	0.982277079	0.711	0.723828353	S7a
S7a-2-5	Sexual	2	28	0	2	1.035293793	0.682666667	0.659394146	S7a
S7a-2-6	Sexual	2	24.66666667	0	2	1.251804067	0.791	0.631888025	S7a
S7a-2-7	Sexual	2	28.33333333	0	2.666666667	2.025817326	0.956	0.471908295	S7a
S7a-2-8	Sexual	2	25	0	2	2.198446452	0.677666667	0.308247975	S7a
S7a-2-9	Sexual	2	26.33333333	0	2	1.218055525	0.833	0.68387687	S7a
S7a-4-1	Sexual	4	11.5	1	3	1.185307253	1.075333333	0.907219061	S7a
S7a-4-10	Sexual	4	11.66666667	1	2.666666667	1.772974999	0.832333333	0.469455764	S7a
S7a-4-2	Sexual	4	8	1	2.666666667	1.336683362	0.695666667	0.520442378	S7a
S7a-4-3	Sexual	4	19.33333333	1	2.666666667	1.534516166	0.757666667	0.49374955	S7a
S7a-4-4	Sexual	4	13	1	2.333333333	1.408456863	0.804666667	0.571310835	S7a
S7a-4-5	Sexual	4	17.33333333	1	2.333333333	1.477477833	0.754666667	0.510780365	S7a
S7a-4-6	Sexual	4	12	1	2.333333333	1.366090545	0.798	0.584148688	S7a
S7a-4-7	Sexual	4	16	1	2.333333333	1.424528107	0.717333333	0.503558568	S7a
S7a-4-8	Sexual	4	12.66666667	1	3	1.630553558	0.847666667	0.519864351	S7a
S7a-4-9	Sexual	4	8	1	3	1.879964608	0.88	0.468093918	S7a
S7a-6-1	Sexual	6	11.33333333	1	2.333333333	1.662193398	0.836666667	0.503350975	S7a
S7a-6-10	Sexual	6	10.33333333	1	2.333333333	1.981248669	0.896666667	0.45257654	S7a
S7a-6-2	Sexual	6	11	1	2.333333333	1.678097561	0.838666667	0.499772294	S7a
S7a-6-3	Sexual	6	12	2	2.333333333	1.900367566	0.965	0.507796501	S7a
S7a-6-4	Sexual	6	7.333333333	2	2	2.444511049	1.872	0.765797316	S7a
S7a-6-5	Sexual	6	10	1	3	2.607039664	1.219	0.467580151	S7a
S7a-6-6	Sexual	6	12.66666667	1	2.333333333	1.844621011	0.857	0.464594079	S7a
S7a-6-7	Sexual	6	16	1	2.666666667	1.47628273	0.744666667	0.50442009	S7a
S7a-6-8	Sexual	6	10.66666667	1	2.666666667	1.923445572	0.876666667	0.455779295	S7a
S7a-6-9	Sexual	6	13.66666667	1	2.333333333	1.540276152	0.775	0.503156527	S7a
S7a-8-1	Sexual	8	17	2	3	2.146994861	1.058666667	0.493092315	S7a
S7a-8-10	Sexual	8	27.66666667	2	3.333333333	1.961681748	0.942333333	0.480370139	S7a
S7a-8-2	Sexual	8	18.66666667	1	3	1.438102537	0.748666667	0.520593385	S7a
S7a-8-3	Sexual	8	15.66666667	2	2.666666667	1.8826079	0.944666667	0.501786201	S7a
S7a-8-4	Sexual	8	14.66666667	2	2.666666667	1.607374799	0.756333333	0.470539499	S7a
S7a-8-5	Sexual	8	16.33333333	2	2.666666667	1.945578157	0.873666667	0.449052465	S7a
S7a-8-6	Sexual	8	26.33333333	2	2.333333333	1.862701201	0.845	0.453642269	S7a
S7a-8-7	Sexual	8	17.33333333	1	2.666666667	1.661647667	0.789	0.474829903	S7a
S7a-8-8	Sexual	8	14	2	3	1.915733657	0.910666667	0.475361835	S7a
S7a-8-9	Sexual	8	18.5	2	3.333333333	1.599490718	0.827	0.517039574	S7a
S7b-2-1	Sexual	2	26.66666667	0	2	2.176801276	0.737666667	0.33887644	S7b
S7b-2-10	Sexual	2	25.33333333	1	2	1.566555667	0.885666667	0.565359205	S7b
S7b-2-2	Sexual	2	23.33333333	1	2	3.010699609	0.755666667	0.250993711	S7b
S7b-2-3	Sexual	2	27.66666667	0	2	0.833072073	0.590666667	0.709022288	S7b
S7b-2-4	Sexual	2	43.33333333	0	2.666666667	1.47317283	0.674666667	0.457968443	S7b
S7b-2-5	Sexual	2	24.66666667	0	2	1.017043718	0.654333333	0.643367951	S7b
S7b-2-6	Sexual	2	30.66666667	0	2	1.512771296	0.75	0.495778841	S7b
S7b-2-7	Sexual	2	35	0	3	1.529959655	0.616	0.402624996	S7b
S7b-2-8	Sexual	2	34.66666667	1	2.666666667	1.318601669	0.739666667	0.560947771	S7b
S7b-2-9	Sexual	2	31.33333333	0	2.666666667	1.301661831	0.786333333	0.604099555	S7b
S7b-4-1	Sexual	4	26	1	2	1.500588049	0.777	0.517797007	S7b
S7b-4-10	Sexual	4	26.66666667	1	2	1.65528517	0.929	0.5612326	S7b
S7b-4-2	Sexual	4	20	1	1	2.236216329	0.966	0.431979674	S7b
S7b-4-3	Sexual	4	24.66666667	1	3.333333333	1.585978371	0.893333333	0.563269556	S7b
S7b-4-4	Sexual	4	30.33333333	0	1.333333333	1.851802372	0.846	0.456852207	S7b
S7b-4-5	Sexual	4	18	1	1.666666667	1.37849606	0.720666667	0.522791967	S7b
S7b-4-6	Sexual	4	27	1	3.333333333	1.197619412	0.95	0.793240315	S7b
S7b-4-7	Sexual	4	22	0	1	1.405911354	0.887666667	0.631381676	S7b
S7b-4-8	Sexual	4	22.33333333	1	1.666666667	1.396146137	0.926666667	0.663731856	S7b
S7b-4-9	Sexual	4	21	1	1.666666667	1.857160093	0.862	0.464149538	S7b
S7b-6-1	Sexual	6	23.66666667	2	3	1.703914519	0.814333333	0.477919123	S7b
S7b-6-10	Sexual	6	29	1	2.333333333	1.659474767	0.841333333	0.506987723	S7b
S7b-6-2	Sexual	6	26	1	3.333333333	2.471856501	1.059	0.428422928	S7b
S7b-6-3	Sexual	6	21.5	1	2.666666667	1.254272351	0.819	0.652968232	S7b
S7b-6-4	Sexual	6	24.66666667	1	2.333333333	2.136385735	0.941666667	0.440775583	S7b
S7b-6-5	Sexual	6	23.33333333	1	3	1.964544679	0.830333333	0.422659429	S7b
S7b-6-6	Sexual	6	24	1	2	1.983216038	0.894666667	0.451119117	S7b
S7b-6-7	Sexual	6	26	1	2.333333333	1.996547395	0.835333333	0.418388932	S7b
S7b-6-8	Sexual	6	25	1	2	1.717481626	0.857333333	0.499180498	S7b
S7b-6-9	Sexual	6	31.33333333	1	3	1.823362446	0.811666667	0.445148286	S7b
S7b-8-1	Sexual	8	19	2	2.666666667	1.694774362	0.784333333	0.462795137	S7b
S7b-8-10	Sexual	8	24	1	3	1.950053611	0.887	0.45485929	S7b
S7b-8-2	Sexual	8	22.66666667	1	2.666666667	1.858862298	0.838	0.450813382	S7b
S7b-8-3	Sexual	8	15	2	2.666666667	1.759777261	0.758	0.430736331	S7b
S7b-8-4	Sexual	8	18.66666667	1	2.333333333	1.49638209	0.743333333	0.496753695	S7b
S7b-8-5	Sexual	8	26.66666667	1	3.333333333	1.896354114	0.823333333	0.43416645	S7b
S7b-8-6	Sexual	8	30.66666667	1	3	1.708781356	0.900333333	0.52688621	S7b
S7b-8-7	Sexual	8		2	3.666666667	1.434396654	0.73	0.508924779	S7b
S7b-8-8	Sexual	8	20.5	2	3	1.924534461	0.921666667	0.478903696	S7b
S7b-8-9	Sexual	8	21	2	3.333333333	1.8669003	0.884333333	0.473690712	S7b
S7c-2-1	Sexual	2	37	1	4	3.512296168	0.741	0.210973097	S7c
S7c-2-10	Sexual	2	31	0	3	1.233279114	0.817333333	0.662731837	S7c
S7c-2-2	Sexual	2	30	0	2	1.093987367	0.692	0.632548438	S7c
S7c-2-3	Sexual	2	31.66666667	0	2	1.291703079	0.798	0.617789036	S7c
S7c-2-4	Sexual	2	30.66666667	0	3	1.098547037	0.788	0.717311115	S7c
S7c-2-5	Sexual	2	32.66666667	0	2.333333333	0.92769178	0.609666667	0.657186665	S7c
S7c-2-6	Sexual	2	34.33333333	0	2	0.978969203	0.634666667	0.648300953	S7c
S7c-2-7	Sexual	2	61	0	2.333333333	1.057443791	0.691666667	0.654093081	S7c
S7c-2-8	Sexual	2	38	0	2	1.078330829	0.663666667	0.61545738	S7c
S7c-2-9	Sexual	2		0	2	0.834948219	0.656	0.785677465	S7c
S7c-4-1	Sexual	4	28.66666667	1	3	1.161153761	0.787666667	0.678348289	S7c
S7c-4-10	Sexual	4	48.66666667	0	3	1.087053292	0.762666667	0.701590872	S7c
S7c-4-2	Sexual	4	33	0	3	1.13113268	0.742333333	0.656274322	S7c
S7c-4-3	Sexual	4		1	3.666666667	2.644158198	0.648333333	0.245194608	S7c
S7c-4-4	Sexual	4	41	1	3	2.412731769	0.781333333	0.323837628	S7c
S7c-4-5	Sexual	4		0	3.666666667	1.476616111	0.921333333	0.623949127	S7c
S7c-4-6	Sexual	4	53.33333333	0	3.333333333	1.120110965	0.9	0.803491822	S7c
S7c-4-7	Sexual	4	44.66666667	0	3	1.610670301	0.891333333	0.553392791	S7c
S7c-4-8	Sexual	4	39	0	3	1.422705172	0.83	0.583395644	S7c
S7c-4-9	Sexual	4	41.66666667	1	3	0.916510065	0.649	0.708120974	S7c
S7c-6-1	Sexual	6		0	3.666666667	3.065338794	0.804	0.262287484	S7c
S7c-6-10	Sexual	6	34	0	3	1.535218231	0.826	0.538034257	S7c
S7c-6-2	Sexual	6	41.33333333	0	3.666666667	1.678020221	0.891333333	0.531181521	S7c
S7c-6-3	Sexual	6	45.33333333	0	4.333333333	1.561457353	0.901333333	0.577238521	S7c
S7c-6-4	Sexual	6	42.66666667	0	4	2.138784348	0.773333333	0.361576114	S7c
S7c-6-5	Sexual	6	40.66666667	0	4	1.347919394	0.875	0.649148609	S7c
S7c-6-6	Sexual	6	50.66666667	0	4.333333333	1.248117219	0.897333333	0.718949566	S7c
S7c-6-7	Sexual	6	45.33333333	0	3.666666667	1.556607844	0.729666667	0.46875433	S7c
S7c-6-8	Sexual	6	42	0	4.333333333	1.621047524	0.785	0.484254773	S7c
S7c-6-9	Sexual	6	41	0	4	2.064008215	0.832	0.403099171	S7c
S7c-8-1	Sexual	8	60	0	3	1.508564915	0.763666667	0.50622062	S7c
S7c-8-10	Sexual	8	32	0	3	1.382211578	0.824333333	0.596387229	S7c
S7c-8-2	Sexual	8	66.66666667	0	3.333333333	1.167006624	0.730333333	0.625817641	S7c
S7c-8-3	Sexual	8	52.33333333	0	3.333333333	1.298897281	0.709666667	0.546360884	S7c
S7c-8-4	Sexual	8	44.33333333	0	3.666666667	1.250532253	0.786333333	0.628798922	S7c
S7c-8-5	Sexual	8	45	0	3.333333333	2.141319005	0.774666667	0.361770789	S7c
S7c-8-6	Sexual	8	28	1	4	1.444955651	0.788333333	0.545576144	S7c
S7c-8-7	Sexual	8	43.33333333	1	3.666666667	2.291883166	0.826	0.360402316	S7c
S7c-8-8	Sexual	8	36.66666667	1	3	3.604854178	0.766	0.212491258	S7c
S7c-8-9	Sexual	8	34.66666667	1	3.333333333	2.473172638	0.720333333	0.291258815	S7c
S7d-2-1	Sexual	2	24.5	1	3	2.218858982	0.697333333	0.314275643	S7d
S7d-2-10	Sexual	2	20.33333333	0	2	1.425693902	0.868333333	0.609060144	S7d
S7d-2-2	Sexual	2	31.33333333	1	3	1.637218537	0.823	0.502681824	S7d
S7d-2-3	Sexual	2	38.66666667	1	2	1.730756077	0.685333333	0.39597338	S7d
S7d-2-4	Sexual	2	43	1	3	1.062513633	0.737	0.693638159	S7d
S7d-2-5	Sexual	2	31.66666667	0	3.333333333	1.057871968	0.610333333	0.576944424	S7d
S7d-2-6	Sexual	2	41.33333333	1	3	0.926548263	0.667666667	0.720595671	S7d
S7d-2-7	Sexual	2	28	0	2	1.191399411	0.745333333	0.625594848	S7d
S7d-2-8	Sexual	2	29.66666667	0	3.666666667	3.052959502	1.274	0.4173	S7d
S7d-2-9	Sexual	2	27.66666667	0	3.666666667	1.34398922	0.891	0.662951746	S7d
S7d-4-1	Sexual	4	44.66666667	1	4.333333333	1.186444192	0.779666667	0.657145673	S7d
S7d-4-10	Sexual	4	35.33333333	0	4	1.343007383	0.778666667	0.579793288	S7d
S7d-4-2	Sexual	4	44	1	4.666666667	1.784580924	0.941	0.527294665	S7d
S7d-4-3	Sexual	4	37.66666667	1	3.333333333	1.385907402	0.84	0.606101099	S7d
S7d-4-4	Sexual	4	31	1	2	1.800173269	0.768333333	0.426810767	S7d
S7d-4-5	Sexual	4	33.33333333	0	3	1.206046689	0.807	0.669128324	S7d
S7d-4-6	Sexual	4	32.33333333	0	3	1.360238504	0.855666667	0.629056349	S7d
S7d-4-7	Sexual	4	21	0	2	1.211924856	0.827	0.682385542	S7d
S7d-4-8	Sexual	4	19	0	2	1.034831765	0.768333333	0.742471732	S7d
S7d-4-9	Sexual	4	30.33333333	0	3.666666667	1.302181255	0.815333333	0.626128912	S7d
S7d-6-1	Sexual	6	19	2	4	2.765015873	1.073	0.388062872	S7d
S7d-6-10	Sexual	6	15.66666667	1	2.666666667	2.246065177	0.844666667	0.376065074	S7d
S7d-6-2	Sexual	6	28	1	3.666666667	2.164195847	1.018666667	0.470690612	S7d
S7d-6-3	Sexual	6	18	2	4	3.444118122	1.076666667	0.312610262	S7d
S7d-6-4	Sexual	6	20.33333333	1	3	6.324863884	0.697	0.1102	S7d
S7d-6-5	Sexual	6	27.33333333	1	3.666666667	1.331536365	0.733333333	0.55074225	S7d
S7d-6-6	Sexual	6	30.33333333	1	4	1.86616939	0.943666667	0.505670424	S7d
S7d-6-7	Sexual	6	19.66666667	1	3.333333333	2.132303896	1.244	0.583406522	S7d
S7d-6-8	Sexual	6	23.33333333	1	2.333333333	1.7997248	0.901	0.500632097	S7d
S7d-6-9	Sexual	6	19	1	3	1.945057929	0.986666667	0.507268525	S7d
S7d-8-1	Sexual	8	38.5	1	4	2.094890618	0.867	0.41386409	S7d
S7d-8-10	Sexual	8	36.33333333	1	3	2.569570323	0.728666667	0.283575297	S7d
S7d-8-2	Sexual	8	18	1	4.666666667	2.166393723	0.981333333	0.45298014	S7d
S7d-8-3	Sexual	8	10.33333333	1	4	2.449086372	1.048333333	0.42805078	S7d
S7d-8-4	Sexual	8	11.33333333	2	4	2.097538163	0.914333333	0.435907841	S7d
S7d-8-5	Sexual	8	12	2	3.333333333	2.205148374	0.804	0.364601316	S7d
S7d-8-6	Sexual	8	12	1	3	2.582366853	0.888666667	0.344128746	S7d
S7d-8-7	Sexual	8	7.666666667	1	3	2.365388641	0.966333333	0.40853047	S7d
S7d-8-8	Sexual	8	10	2	3.666666667	1.83705142	0.811666667	0.441831218	S7d
S7d-8-9	Sexual	8	14	2	3	2.031586598	0.854333333	0.420525186	S7d
