# Supplementary material for: Selection on plastic adherence leads to hyper-multicellular strains and incidental virulence in the budding yeast
Source: eLife. 2023 Nov 2;12:e81056. doi: 10.7554/eLife.81056 (PMC10764007; doi:10.7554/eLife.81056)
Supplement: Figure 2—source data 2. [file elife-81056-fig2-data2.csv]

Sample	Population	Treatment	Cycle	CCMScore	PSH	FlorScore	Normalized.Fluorescence	OD	Raw.Fluorescence
A8a-1-1	A8a	Asexual	1	2	24	2	7.369596901	0.529733333	3.94
A8a-1-10	A8a	Asexual	1	2	24	2	4.843074717	0.4771	2.321
A8a-1-2	A8a	Asexual	1	2	23.66666667	2	6.03039269	0.461633333	2.802666667
A8a-1-3	A8a	Asexual	1	2	22	2	4.698179027	0.445666667	2.266
A8a-1-4	A8a	Asexual	1	2	23.33333333	2	7.872634332	0.431233333	4.107333333
A8a-1-5	A8a	Asexual	1	2	26.66666667	1	5.527877145	0.5151	2.941333333
A8a-1-6	A8a	Asexual	1	2	22.66666667	1	4.829739397	0.5125	2.491666667
A8a-1-7	A8a	Asexual	1	2	23.66666667	1	5.394635681	0.5542	3.068666667
A8a-1-8	A8a	Asexual	1	2	21.5	2	5.114927956	0.490933333	2.529666667
A8a-1-9	A8a	Asexual	1	2	19	2	5.102933856	0.480933333	2.456
A8a-3-1	A8a	Asexual	3	2	31	2	6.939478488	0.490266667	2.171333333
A8a-3-10	A8a	Asexual	3	2	33	2	12.95593781	0.4849	2.542333333
A8a-3-2	A8a	Asexual	3	2.666666667	29	3	6.787050065	0.461966667	2.924666667
A8a-3-3	A8a	Asexual	3	2	28.33333333	2	7.444529892	0.503066667	2.836333333
A8a-3-4	A8a	Asexual	3	2		2	8.295979485	0.483266667	2.103
A8a-3-5	A8a	Asexual	3	2	33	3	11.11183219	0.4522	2.747
A8a-3-6	A8a	Asexual	3	2	23.5	2	8.881173231	0.515266667	3.015
A8a-3-7	A8a	Asexual	3	2	25.5	3	7.942685082	0.4789	2.681
A8a-3-8	A8a	Asexual	3	2	22.33333333	3	5.961971398	0.5282	3.728333333
A8a-3-9	A8a	Asexual	3	2	24.5	2	6.393126137	0.507966667	2.797666667
A8a-6-1	A8a	Asexual	6	2.333333333		3	5.496621615	0.526566667	3.100666667
A8a-6-10	A8a	Asexual	6	2.666666667	22	3	4.17986558	0.401466667	1.693666667
A8a-6-2	A8a	Asexual	6	2		3	7.99828296	0.4661	1.882666667
A8a-6-3	A8a	Asexual	6	3	22	3	4.688732516	0.422133333	1.965333333
A8a-6-4	A8a	Asexual	6	4	23.5	3	4.887941839	0.446233333	2.181
A8a-6-5	A8a	Asexual	6	4	18	3	7.734664477	0.506433333	4.231666667
A8a-6-6	A8a	Asexual	6	3	19.5	3	7.793546675	0.4237	3.524666667
A8a-6-7	A8a	Asexual	6	3	20.5	3	7.891606985	0.3698	2.419666667
A8a-6-8	A8a	Asexual	6	5	20	3	11.0641742	0.513733333	6.080666667
A8a-6-9	A8a	Asexual	6	3.333333333	18	3	4.639119801	0.396333333	1.854333333
A8a-9-1	A8a	Asexual	9	2	16	3	11.87032701	0.363866667	4.269
A8a-9-10	A8a	Asexual	9	2	33.66666667	4	2.612247207	0.4362	2.457
A8a-9-2	A8a	Asexual	9	2.666666667	0	3	13.06185255	0.3552	4.571333333
A8a-9-3	A8a	Asexual	9	2.666666667	43	3	11.49888403	0.377533333	4.087666667
A8a-9-4	A8a	Asexual	9	2.666666667	33.5	3	10.19332825	0.369166667	3.752666667
A8a-9-5	A8a	Asexual	9	2.666666667	35	1	5.564065035	0.4265	2.413
A8a-9-6	A8a	Asexual	9	2	52	3	7.962910297	0.385366667	3.080666667
A8a-9-7	A8a	Asexual	9	2	34	3	9.582591344	0.3605	3.453333333
A8a-9-8	A8a	Asexual	9	2	39	3	7.789475871	0.3501	2.735666667
A8a-9-9	A8a	Asexual	9	2	39.33333333	3	7.107133338	0.410133333	2.741
A8b-1-1	A8b	Asexual	1	2	21.66666667	1	6.42199273	0.4787	3.119333333
A8b-1-10	A8b	Asexual	1	2	29	1	5.672632881	0.439466667	2.364666667
A8b-1-2	A8b	Asexual	1	2	31	1	12.81082342	0.3779	4.42
A8b-1-3	A8b	Asexual	1	2	24.66666667	1	6.44549514	0.536466667	3.488
A8b-1-4	A8b	Asexual	1	2	23.33333333	2	5.555653544	0.534166667	2.983666667
A8b-1-5	A8b	Asexual	1	2	21	2	6.398995765	0.538166667	3.523333333
A8b-1-6	A8b	Asexual	1	2		2	5.117205409	0.446666667	2.257
A8b-1-7	A8b	Asexual	1	2	21.5	1	6.151464273	0.5092	3.167333333
A8b-1-8	A8b	Asexual	1	2	22.66666667	1	5.493121265	0.501733333	2.767
A8b-1-9	A8b	Asexual	1	2	22.66666667	1	5.783728714	0.438166667	2.541
A8b-3-1	A8b	Asexual	3	2		3	6.91361129	0.492333333	2.919
A8b-3-10	A8b	Asexual	3	2	25	2	5.486930977	0.488133333	2.719
A8b-3-2	A8b	Asexual	3	2	23	2	7.664771166	0.513733333	3.003
A8b-3-3	A8b	Asexual	3	2	22.5	2	6.322820191	0.527033333	4.669666667
A8b-3-4	A8b	Asexual	3	2	24	2	14.84933367	0.513033333	3.563
A8b-3-5	A8b	Asexual	3	2	33	2	7.889652659	0.475233333	3.044
A8b-3-6	A8b	Asexual	3	2	32	2	13.04586397	0.522833333	2.476
A8b-3-7	A8b	Asexual	3	2	30	3	11.89899809	0.535466667	2.908
A8b-3-8	A8b	Asexual	3	2		2	10.28638328	0.514233333	4.897666667
A8b-3-9	A8b	Asexual	3	2	32	2	21.55545104	0.472733333	2.497666667
A8b-6-1	A8b	Asexual	6	3	21.5	3	5.452545782	0.433233333	2.366
A8b-6-10	A8b	Asexual	6	3	26.5	2	9.208657786	0.442066667	4.259
A8b-6-2	A8b	Asexual	6	2.666666667	25.5	2	5.234411903	0.4654	2.439666667
A8b-6-3	A8b	Asexual	6	2.666666667	22.5	2	10.0540099	0.5041	5.125333333
A8b-6-4	A8b	Asexual	6	3	20.5	2	8.622519251	0.497066667	4.434666667
A8b-6-5	A8b	Asexual	6	2	24.5	2	6.239164954	0.470433333	2.956
A8b-6-6	A8b	Asexual	6	2.666666667	25.5	2	11.6040978	0.484033333	6.194
A8b-6-7	A8b	Asexual	6	3	41.5	2	6.387437176	0.3848	2.279
A8b-6-8	A8b	Asexual	6	2.666666667	21	2	7.87797861	0.480866667	3.879333333
A8b-6-9	A8b	Asexual	6	2.333333333	31	2	7.040529861	0.482066667	3.342
A8b-9-1	A8b	Asexual	9	2.333333333	30	2	2.685897927	0.365233333	2.558666667
A8b-9-10	A8b	Asexual	9	2.666666667	38.33333333	3
A8b-9-2	A8b	Asexual	9	1	18	3	2.191945397	0.469166667	1.700666667
A8b-9-3	A8b	Asexual	9	2.333333333	29	2	2.347453746	0.473866667	2.911333333
A8b-9-4	A8b	Asexual	9	2.333333333	29.66666667	3	2.917424782	0.431566667	2.042666667
A8b-9-5	A8b	Asexual	9	2	27	3	5.960615617	0.476033333	2.863666667
A8b-9-6	A8b	Asexual	9	2	27.66666667	2	5.324411765	0.3688	1.933333333
A8b-9-7	A8b	Asexual	9	2.666666667	35.33333333	3
A8b-9-8	A8b	Asexual	9	2.666666667	34.66666667	4
A8b-9-9	A8b	Asexual	9	2.666666667	22.33333333	2
A8c-1-1	A8c	Asexual	1	2	20	2	13.74346195	0.458366667	4.766333333
A8c-1-10	A8c	Asexual	1	2	23.66666667	3	5.523632657	0.5131	2.834666667
A8c-1-2	A8c	Asexual	1	2	28	2	5.045542487	0.438666667	2.207
A8c-1-3	A8c	Asexual	1	2	19	2	4.907695135	0.495166667	2.437666667
A8c-1-4	A8c	Asexual	1	2	21.5	2	6.167915611	0.504833333	3.110666667
A8c-1-5	A8c	Asexual	1	2	22	2	4.422203638	0.535033333	2.365333333
A8c-1-6	A8c	Asexual	1	2	21.33333333	2	5.379293417	0.4875	2.667333333
A8c-1-7	A8c	Asexual	1	2	23.33333333	2	4.46327579	0.468466667	2.090333333
A8c-1-8	A8c	Asexual	1	1.666666667	25.66666667	1	4.877430803	0.496866667	2.374
A8c-1-9	A8c	Asexual	1	2	30.33333333	2	4.928566121	0.513633333	2.529333333
A8c-3-1	A8c	Asexual	3	2	29.5	2	8.178216879	0.461933333	2.347666667
A8c-3-10	A8c	Asexual	3	1	20.66666667	2	7.505740712	0.633166667	2.642
A8c-3-2	A8c	Asexual	3	2	32	3	5.284122155	0.5179	5.872333333
A8c-3-3	A8c	Asexual	3	2	25	2	6.069718038	0.457666667	2.765666667
A8c-3-4	A8c	Asexual	3	2	37	2	8.927287675	0.5148	5.146333333
A8c-3-5	A8c	Asexual	3	2		3	7.271335655	0.4646	4.266
A8c-3-6	A8c	Asexual	3	2		3	10.1243603	0.467366667	3.822333333
A8c-3-7	A8c	Asexual	3	2		3	7.391241894	0.501633333	9.635
A8c-3-8	A8c	Asexual	3	2	24.33333333	2	6.331460111	0.486833333	2.115333333
A8c-3-9	A8c	Asexual	3	2	23.33333333	3	8.62562639	0.5274	3.310333333
A8c-6-1	A8c	Asexual	6	1.666666667	18.5	2	6.589685641	0.475633333	3.124
A8c-6-10	A8c	Asexual	6	2.666666667	29.5	2	13.14499033	0.499166667	7.904333333
A8c-6-2	A8c	Asexual	6	2	17.5	2	5.58007241	0.488766667	2.783333333
A8c-6-3	A8c	Asexual	6	3	43.5	3	9.468294395	0.479766667	4.997
A8c-6-4	A8c	Asexual	6	1	22.5	2	5.223329352	0.5456	2.893
A8c-6-5	A8c	Asexual	6	3.666666667	46	2	5.45343649	0.385933333	2.292666667
A8c-6-6	A8c	Asexual	6	1	18	1	6.951276029	0.566	4.053333333
A8c-6-7	A8c	Asexual	6	1	18.5	1	5.128585617	0.457066667	2.329
A8c-6-8	A8c	Asexual	6	1	18.5	1	4.555284184	0.467333333	2.126333333
A8c-6-9	A8c	Asexual	6	3	19.5	2	10.34055182	0.5091	5.878333333
A8c-9-1	A8c	Asexual	9	1.666666667	29.33333333	1
A8c-9-10	A8c	Asexual	9	1.666666667	23.66666667	1	4.251758066	0.500166667	2.107666667
A8c-9-2	A8c	Asexual	9	1.333333333	24	1	5.4559639	0.556433333	3.117666667
A8c-9-3	A8c	Asexual	9	1.333333333	32.66666667	1	4.655905213	0.523433333	2.481
A8c-9-4	A8c	Asexual	9	1.333333333	29	1	4.625605077	0.516766667	2.456
A8c-9-5	A8c	Asexual	9	2.333333333	31.66666667	3	3.895965428	0.522966667	2.488333333
A8c-9-6	A8c	Asexual	9	1	22.66666667	1	5.355604362	0.509	3.812333333
A8c-9-7	A8c	Asexual	9	1.666666667	27	1	5.704507745	0.494966667	2.153333333
A8c-9-8	A8c	Asexual	9	1	22	2	7.265050646	0.528266667	2.358666667
A8c-9-9	A8c	Asexual	9	1.333333333	22.66666667	1	5.313122636	0.534	2.290333333
A8d-1-1	A8d	Asexual	1	2	21.33333333	1	5.738345054	0.523133333	3.048333333
A8d-1-10	A8d	Asexual	1	2	26	3	5.643287873	0.5002	2.828
A8d-1-2	A8d	Asexual	1	2.666666667	23	3	6.097109544	0.464033333	2.826
A8d-1-3	A8d	Asexual	1	2	22	2	6.21510714	0.4984	3.103333333
A8d-1-4	A8d	Asexual	1	2	24.66666667	1	4.239421795	0.483633333	2.061666667
A8d-1-5	A8d	Asexual	1	2	27	2	4.719582041	0.450666667	2.087333333
A8d-1-6	A8d	Asexual	1	2	26.33333333	1	6.535006998	0.474666667	3.134
A8d-1-7	A8d	Asexual	1	2	27	1	4.615092092	0.510066667	2.341333333
A8d-1-8	A8d	Asexual	1	2	24	3	5.157345569	0.4998	2.645
A8d-1-9	A8d	Asexual	1	2	23	2	5.589592476	0.511333333	2.902
A8d-3-1	A8d	Asexual	3	2	21	2	6.747905375	0.542733333	2.482
A8d-3-10	A8d	Asexual	3	2	25.33333333	2	6.530133178	0.509	2.257333333
A8d-3-2	A8d	Asexual	3	2	28	2	5.919231229	0.517933333	3.541333333
A8d-3-3	A8d	Asexual	3	2	27	1	4.120178043	0.525866667	2.955666667
A8d-3-4	A8d	Asexual	3	2.333333333	29	2	4.231325532	0.5367	4.218
A8d-3-5	A8d	Asexual	3	2	30.5	2	8.680591175	0.481166667	2.79
A8d-3-6	A8d	Asexual	3	2	20.33333333	3	8.443625395	0.481533333	2.286666667
A8d-3-7	A8d	Asexual	3	2	22.33333333	2	8.380069525	0.509933333	3.202
A8d-3-8	A8d	Asexual	3	2	23	3	2.813645904	0.499033333	2.855666667
A8d-3-9	A8d	Asexual	3	2	21.66666667	2	10.1827092	0.474466667	2.314333333
A8d-6-1	A8d	Asexual	6	3	22.5	2	5.944546797	0.503666667	3.087333333
A8d-6-10	A8d	Asexual	6	2.333333333	20	1	6.38029019	0.4768	3.014333333
A8d-6-2	A8d	Asexual	6	2.666666667	21.5	3	8.089711327	0.478433333	4.054
A8d-6-3	A8d	Asexual	6	3	19.5	2	5.665464225	0.4293	2.448333333
A8d-6-4	A8d	Asexual	6		22.5	1	7.256993698	0.5354	4.019333333
A8d-6-5	A8d	Asexual	6	2.666666667	23.5	2	5.816738968	0.413266667	2.319
A8d-6-6	A8d	Asexual	6	3	20	2	7.665076028	0.446466667	3.587666667
A8d-6-7	A8d	Asexual	6	3	17.5	3	7.965027404	0.493766667	4.086333333
A8d-6-8	A8d	Asexual	6	2.666666667	19.5	3	5.646155884	0.448433333	2.52
A8d-6-9	A8d	Asexual	6	2.333333333	19.5	3	4.884107743	0.4281	2.093666667
A8d-9-1	A8d	Asexual	9	2.666666667	25	1	6.532244368	0.5429	3.517666667
A8d-9-10	A8d	Asexual	9	3.333333333	29.66666667	0	9.231803449	0.4942	4.586666667
A8d-9-2	A8d	Asexual	9	3.666666667	27.33333333	1	6.341308845	0.528533333	3.369
A8d-9-3	A8d	Asexual	9	2	32	1	4.764101768	0.510666667	2.949666667
A8d-9-4	A8d	Asexual	9	3.333333333	26.33333333	1	7.882860544	0.514733333	3.395333333
A8d-9-5	A8d	Asexual	9	2	30	1	4.417216597	0.5281	3.242
A8d-9-6	A8d	Asexual	9	3	26	1	4.409488492	0.536866667	3.403
A8d-9-7	A8d	Asexual	9	2.666666667	26.66666667	1	4.311762389	0.569266667	4.429
A8d-9-8	A8d	Asexual	9	2.666666667	31.66666667	1	6.101822744	0.520966667	3.184666667
A8d-9-9	A8d	Asexual	9	3.333333333	26.33333333	1	6.640873059	0.498933333	3.289333333
Anc-21	Anc	Ancestor	0	2.666666667	21.5	3
Anc-22	Anc	Ancestor	0	2	14	2	4.109304594	0.5501	2.294333333
Anc-23	Anc	Ancestor	0	1	15.33333333	1	3.481011862	0.493366667	1.662333333
Anc-24	Anc	Ancestor	0	2	16.33333333	2	1.495090276	0.382133333	1.461333333
Anc-25	Anc	Ancestor	0	2	17.66666667	1	5.124549495	0.5504	2.634333333
Anc-26	Anc	Ancestor	0	1	13.66666667	0	2.078796535	0.453766667	0.921
Anc-27	Anc	Ancestor	0	1.333333333	18.66666667	1	3.635245939	0.451166667	1.542666667
Anc-28	Anc	Ancestor	0	1.333333333	17	3	3.406036013	0.320933333	1.311333333
Anc-29	Anc	Ancestor	0	2	14	2	2.676422031	0.410766667	1.083333333
Anc-30	Anc	Ancestor	0	2	13.66666667	2	4.47879161	0.463566667	2.167666667
Anc-8-1	Anc	Ancestor	0	2		1	3.448650282	0.435766667	2.148666667
Anc-8-10	Anc	Ancestor	0	2	22.66666667	1	7.172599968	0.538966667	3.852333333
Anc-8-11	Anc	Ancestor	0	2	20	1	6.552454363	0.5199	3.319666667
Anc-8-12	Anc	Ancestor	0	2	22	2	4.847168922	0.503166667	2.412
Anc-8-13	Anc	Ancestor	0	2	26	1	4.769125718	0.4843	2.295333333
Anc-8-14	Anc	Ancestor	0	2	24	1	4.407484652	0.4787	2.109666667
Anc-8-15	Anc	Ancestor	0	2	23.66666667	1	4.663047995	0.470466667	2.202666667
Anc-8-16	Anc	Ancestor	0	2	25	1	8.62505682	0.444366667	3.831666667
Anc-8-17	Anc	Ancestor	0	2	26.5	2	6.941943449	0.479966667	3.277666667
Anc-8-18	Anc	Ancestor	0	2	23	2	8.129243509	0.5113	4.182666667
Anc-8-19	Anc	Ancestor	0	2	22.66666667	1	7.300691901	0.542733333	3.982
Anc-8-2	Anc	Ancestor	0	2	20.66666667	1	4.699939841	0.4564	2.851
Anc-8-20	Anc	Ancestor	0	2	21	2	6.188747403	0.494033333	3.082333333
Anc-8-3	Anc	Ancestor	0	2	24.66666667	1	4.935263508	0.4423	2.903333333
Anc-8-4	Anc	Ancestor	0	2	21.66666667	1	5.493772479	0.472966667	2.608
Anc-8-5	Anc	Ancestor	0	2	23.33333333	1	4.65960674	0.432033333	2.288333333
Anc-8-6	Anc	Ancestor	0	2	22.66666667	1	5.033038102	0.4824	2.402333333
Anc-8-7	Anc	Ancestor	0	2	21.33333333	1	4.851852687	0.4287	2.482666667
Anc-8-8	Anc	Ancestor	0	2	23	1	6.350657932	0.499733333	3.156333333
Anc-8-9	Anc	Ancestor	0	2	24	2	4.8392286	0.4804	2.250333333
C8a-1-1	C8a	Control	1	2		3	5.621973791	0.448666667	2.481666667
C8a-1-10	C8a	Control	1	2	21	1	3.246970839	0.528366667	2.218333333
C8a-1-2	C8a	Control	1	2		2	5.163928111	0.469833333	2.427
C8a-1-3	C8a	Control	1	2		1	5.276707133	0.475766667	2.508333333
C8a-1-4	C8a	Control	1	2		2	5.730866243	0.435266667	2.485333333
C8a-1-5	C8a	Control	1	2		2	5.507598269	0.4766	2.618666667
C8a-1-6	C8a	Control	1	2		2	5.576969179	0.504266667	2.751333333
C8a-1-7	C8a	Control	1	1.333333333	23.33333333	1	5.355499587	0.5914	2.837
C8a-1-8	C8a	Control	1	1.333333333	22.33333333	1
C8a-1-9	C8a	Control	1	2	18.33333333	1	3.154983713	0.508533333	2.870666667
C8a-3-1	C8a	Control	3	2	22	1	4.940897761	0.510633333	1.853
C8a-3-10	C8a	Control	3	2		1	5.46337259	0.5514	2.093666667
C8a-3-2	C8a	Control	3	2	23	1	4.634263118	0.5238	1.707333333
C8a-3-3	C8a	Control	3	2	25	1	6.868726817	0.079733333	0.812666667
C8a-3-4	C8a	Control	3	2	25	1	5.267964497	0.518133333	2.290666667
C8a-3-5	C8a	Control	3	2		1	5.766745461	0.533633333	2.107333333
C8a-3-6	C8a	Control	3	2	0	2	6.29849601	0.527066667	1.919
C8a-3-7	C8a	Control	3	2	24	1	5.991414502	0.509066667	1.739
C8a-3-8	C8a	Control	3	2	25	1	6.834629253	0.538866667	1.655666667
C8a-3-9	C8a	Control	3	2	35	1	5.46562341	0.5292	1.965
C8a-6-1	C8a	Control	6	3	21	1	4.324399347	0.5413	2.429
C8a-6-10	C8a	Control	6	2.666666667	21	1	2.786765408	0.531033333	1.466
C8a-6-2	C8a	Control	6	2.666666667	24	1	3.70538786	0.5432	2.002333333
C8a-6-3	C8a	Control	6	2.666666667	21	1	4.322080701	0.497133333	2.141
C8a-6-4	C8a	Control	6	2.666666667	23	1	3.007296359	0.525033333	1.572333333
C8a-6-5	C8a	Control	6	2.666666667	19	1	3.748110359	0.483633333	1.756333333
C8a-6-6	C8a	Control	6	3	21.5	2	4.116178966	0.544133333	2.222
C8a-6-7	C8a	Control	6	3	20	1	4.271408851	0.510533333	2.078666667
C8a-6-8	C8a	Control	6	3	22.5	1	3.794563524	0.5127	1.949333333
C8a-6-9	C8a	Control	6	3	18	1
C8a-9-1	C8a	Control	9	4	42.66666667	1	3.418531213	0.5314	1.772333333
C8a-9-10	C8a	Control	9	3	68	0	3.090788356	0.460033333	1.672
C8a-9-2	C8a	Control	9	4	48.33333333	1	6.182747389	0.557566667	1.714333333
C8a-9-3	C8a	Control	9	4.333333333	60	1	7.329545572	0.6003	1.679333333
C8a-9-4	C8a	Control	9	2.666666667	48	1	3.629165445	0.534366667	1.553
C8a-9-5	C8a	Control	9	5	65.66666667	1	6.189513378	0.6089	1.82
C8a-9-6	C8a	Control	9	2	56	1	4.673893488	0.550266667	1.488666667
C8a-9-7	C8a	Control	9	2	54	1	3.142904388	0.556666667	1.751
C8a-9-8	C8a	Control	9	2	62.66666667	1	3.018475334	0.6268	1.785333333
C8a-9-9	C8a	Control	9	2	44.33333333	0	3.980360381	0.5008	1.990333333
C8s-1-1	C8s	Control	1	2	23	2	2.210871588	0.555666667	2.511666667
C8s-1-10	C8s	Control	1	2	25.33333333	1	8.795614046	0.5801	2.471
C8s-1-2	C8s	Control	1	2	18.66666667	1	8.709999454	0.611733333	2.738
C8s-1-3	C8s	Control	1	2	22	2	4.658414926	0.5701	2.455666667
C8s-1-4	C8s	Control	1	2	23.33333333	2	3.649412987	0.5404	3.540333333
C8s-1-5	C8s	Control	1	2	28.33333333	2	7.156940296	0.532833333	2.466
C8s-1-6	C8s	Control	1	2	23.66666667	2	5.487485429	0.552366667	2.532666667
C8s-1-7	C8s	Control	1	2	23	2	7.549716326	0.5516	2.545333333
C8s-1-8	C8s	Control	1	2	23.33333333	2	7.247306725	0.515233333	2.795666667
C8s-1-9	C8s	Control	1	2	20.33333333	2	7.05675944	0.5518	2.431
CA8-c-9-1	CA8c	Control	9	1	17.66666667	0	3.247381929	0.437066667	1.375333333
CA8-c-9-10	CA8c	Control	9	1	20	0	2.842406592	0.4431	1.211
CA8-c-9-2	CA8c	Control	9	1	18.66666667	0	2.473967328	0.421666667	1.017
CA8-c-9-3	CA8c	Control	9	1	18.33333333	0	2.48885871	0.406433333	1.003
CA8-c-9-4	CA8c	Control	9	1.333333333	24.5	1	3.115818578	0.385666667	1.211
CA8-c-9-5	CA8c	Control	9	1	18	0	2.986475633	0.381633333	1.140333333
CA8-c-9-6	CA8c	Control	9	1	19.66666667	0	2.479641291	0.387966667	0.957
CA8-c-9-7	CA8c	Control	9	1	15.33333333	1	2.202626575	0.410866667	0.878666667
CA8-c-9-8	CA8c	Control	9	1	17	1	2.576542602	0.434	1.089
CA8-c-9-9	CA8c	Control	9	1	18	0	2.894876618	0.4412	1.253
CA8a-1-1	CA8a	Control	1	2	17.66666667	3	4.91764322	0.427866667	2.032666667
CA8a-1-10	CA8a	Control	1	1	14.66666667	3	3.74074931	0.4918	1.755333333
CA8a-1-2	CA8a	Control	1	1	16.33333333	0	2.085438469	0.496433333	0.987333333
CA8a-1-3	CA8a	Control	1	1.666666667	21.33333333	2	2.679878705	0.4967	1.34
CA8a-1-4	CA8a	Control	1	2	20	2	2.989599734	0.466466667	1.278
CA8a-1-5	CA8a	Control	1	1.333333333	14.33333333	1	2.827618738	0.504833333	1.421333333
CA8a-1-6	CA8a	Control	1	2	23.33333333	2	5.540566512	0.4647	2.542333333
CA8a-1-7	CA8a	Control	1	2	16	3
CA8a-1-8	CA8a	Control	1	2	15	2	3.481275252	0.438866667	1.517666667
CA8a-1-9	CA8a	Control	1	2	10	4	3.67217071	0.422166667	1.552
CA8a-3-1	CA8a	Control	3	1	15	1	3.095767511	0.514733333	1.552
CA8a-3-10	CA8a	Control	3	1	17.5	1	4.360124314	0.4619	1.936666667
CA8a-3-2	CA8a	Control	3	1	15	1	4.450683017	0.502966667	2.292666667
CA8a-3-3	CA8a	Control	3	2	15.66666667	1	3.604647669	0.4336	1.538333333
CA8a-3-4	CA8a	Control	3	1	16	1	2.791188596	0.475866667	1.334
CA8a-3-5	CA8a	Control	3	1	11.33333333	0	1.864993323	0.413966667	0.775333333
CA8a-3-6	CA8a	Control	3	1	18	1	2.52547087	0.4641	1.132666667
CA8a-3-7	CA8a	Control	3	1	14.5	1	2.448841646	0.4875	1.167333333
CA8a-3-8	CA8a	Control	3	1	16	1	1.867991845	0.452633333	0.831333333
CA8a-3-9	CA8a	Control	3	1	14.5	1	3.277022394	0.443733333	1.476666667
CA8a-6-1	CA8a	Control	6	1	24	1	5.007127476	0.66175	3.3135
CA8a-6-10	CA8a	Control	6	1	21	1	4.000730588	0.6834	2.7175
CA8a-6-2	CA8a	Control	6	1	18	1	2.066884723	7.800166667	1.391666667
CA8a-6-3	CA8a	Control	6	1.666666667	22.5	1	3.69952951	0.7646	2.824
CA8a-6-4	CA8a	Control	6	2	20.5	0	4.104798823	0.7347	2.858666667
CA8a-6-5	CA8a	Control	6	1.666666667	26	0	3.371093862	0.4893	1.636
CA8a-6-6	CA8a	Control	6	1.666666667	21	1	2.243267125	0.60815	1.374
CA8a-6-7	CA8a	Control	6	1	23	1	4.016598801	7.692133333	2.183633333
CA8a-6-8	CA8a	Control	6	1	21.5	1	3.700024852	0.5989	2.23
CA8a-6-9	CA8a	Control	6	1	26	3	3.265518981	0.68555	2.2695
CA8a-9-1	CA8a	Control	9	2	34	1	5.491283719	0.448433333	2.444666667
CA8a-9-10	CA8a	Control	9	1.333333333	21.33333333	1	5.10515224	0.3407	1.736
CA8a-9-2	CA8a	Control	9	1	20	0	2.332350401	0.351366667	0.825333333
CA8a-9-3	CA8a	Control	9	1	18.66666667	0	3.601985912	0.365466667	1.319666667
CA8a-9-4	CA8a	Control	9	1	19.66666667	2	2.778427676	0.410533333	1.135666667
CA8a-9-5	CA8a	Control	9	2	22	1	5.750790954	0.4787	2.931666667
CA8a-9-6	CA8a	Control	9	1	19.33333333	0	1.88502428	0.423833333	0.802
CA8a-9-7	CA8a	Control	9	1	20.66666667	0	2.819614231	0.385	1.085333333
CA8a-9-8	CA8a	Control	9	1	22.33333333	0	3.458145686	0.375166667	1.298333333
CA8a-9-9	CA8a	Control	9	1	16.33333333	0	3.480278753	0.387366667	1.342333333
CA8b-1-1	CA8b	Control	1	1	13	3	4.149563379	0.493533333	2.093
CA8b-1-10	CA8b	Control	1	1	14.33333333	1	2.023240515	0.495333333	0.97
CA8b-1-2	CA8b	Control	1	1	16.66666667	1	2.131627366	0.4164	0.864666667
CA8b-1-3	CA8b	Control	1	2	16	3	3.257233507	0.3556	1.403333333
CA8b-1-4	CA8b	Control	1	2	19.66666667	3	3.256373256	0.319033333	1.610333333
CA8b-1-5	CA8b	Control	1	1	15	0	2.718130128	0.4839	1.31
CA8b-1-6	CA8b	Control	1	1	15	0	3.418889955	0.479666667	1.656333333
CA8b-1-7	CA8b	Control	1	2	15.66666667	2	4.220555654	0.515033333	2.176
CA8b-1-8	CA8b	Control	1	1.333333333	18.33333333	3	3.788093939	0.579666667	2.199333333
CA8b-1-9	CA8b	Control	1	1	21.33333333	3	3.429752251	0.549066667	1.833
CA8b-3-1	CA8b	Control	3	1.333333333	17.33333333	1	3.853189127	0.555766667	2.144333333
CA8b-3-10	CA8b	Control	3	1.666666667		1	2.421946279	0.4777	1.163
CA8b-3-2	CA8b	Control	3	1.333333333	23	1	4.543160418	0.471333333	2.118666667
CA8b-3-3	CA8b	Control	3	1	18	0	3.222742642	0.475266667	1.502333333
CA8b-3-4	CA8b	Control	3	1.333333333	13	1	6.071219731	0.646066667	4.337666667
CA8b-3-5	CA8b	Control	3	1	20.66666667	2	2.602839757	0.4778	1.221333333
CA8b-3-6	CA8b	Control	3	1	16.5	1	3.698610894	0.493566667	1.897666667
CA8b-3-7	CA8b	Control	3	1.666666667	18.33333333	0
CA8b-3-8	CA8b	Control	3	2	27.33333333	3	6.083695237	0.411	2.851666667
CA8b-3-9	CA8b	Control	3	1		1	2.944106897	0.5608	1.698333333
CA8b-6-1	CA8b	Control	6	1	20.33333333	1	3.58419975	0.60905	2.183
CA8b-6-10	CA8b	Control	6	1	26.5	1	1.783540405	0.53815	0.9675
CA8b-6-2	CA8b	Control	6	1	21.5	0	1.881357731	0.5172	0.976
CA8b-6-3	CA8b	Control	6	1.333333333	26	0	2.028780945	0.59105	1.2045
CA8b-6-4	CA8b	Control	6	1	22.5	0	2.357501163	7.779066667	0.951
CA8b-6-5	CA8b	Control	6	1.333333333	24.5	0	3.914995717	0.50585	1.977
CA8b-6-6	CA8b	Control	6	1	33.66666667	1	3.352295186	0.46465	1.7305
CA8b-6-7	CA8b	Control	6	1	21	1	2.792510693	0.53285	1.487
CA8b-6-8	CA8b	Control	6	1	20	0	3.407521838	0.5884	2.0035
CA8b-6-9	CA8b	Control	6	2	29.5	3	5.079300582	7.895066667	3.758633333
CA8b-9-1	CA8b	Control	9	1	20.66666667	1	2.277918629	0.362633333	0.825
CA8b-9-10	CA8b	Control	9	1	18	0	1.968108904	0.4283	0.843
CA8b-9-2	CA8b	Control	9	1	21	0	3.627308233	0.4225	1.522333333
CA8b-9-3	CA8b	Control	9	1	18.33333333	1	2.188360597	0.427766667	0.910666667
CA8b-9-4	CA8b	Control	9	1	20.66666667	1	1.985108617	0.3944	0.774666667
CA8b-9-5	CA8b	Control	9	1	20	1	1.970625129	0.3797	0.74
CA8b-9-6	CA8b	Control	9	1	29.33333333	1	3.66253856	0.3817	1.389
CA8b-9-7	CA8b	Control	9	2	21.66666667	1	5.344124217	0.3529	1.895333333
CA8b-9-8	CA8b	Control	9	1.5	21.33333333	2	2.921298789	0.347166667	1.016333333
CA8b-9-9	CA8b	Control	9	1	16.33333333	2	4.83859941	0.414333333	1.99
CA8c-1-1	CA8c	Control	1	2	19.66666667	4	3.348948013	0.422533333	1.679333333
CA8c-1-10	CA8c	Control	1	1.333333333	20.66666667	3	3.565665443	0.391933333	1.295666667
CA8c-1-2	CA8c	Control	1	1	19	2	3.265155232	0.406533333	1.248333333
CA8c-1-3	CA8c	Control	1	1	17	1	4.590154416	0.6048	2.746666667
CA8c-1-4	CA8c	Control	1	2	19	3	3.598070829	0.415366667	1.413
CA8c-1-5	CA8c	Control	1	1	12.33333333	1	3.243443185	0.450966667	1.460666667
CA8c-1-6	CA8c	Control	1	1	14.33333333	1	2.111788927	0.492133333	1.018666667
CA8c-1-7	CA8c	Control	1	1	14.33333333	1	3.761461912	0.5291	1.968333333
CA8c-1-8	CA8c	Control	1	1.333333333	16	0	1.789971614	0.496233333	0.859666667
CA8c-1-9	CA8c	Control	1	1	17	0	2.584623049	0.4481	1.116333333
CA8c-3-1	CA8c	Control	3	1	16.33333333	1	3.399193181	0.532366667	1.854666667
CA8c-3-10	CA8c	Control	3	2	26.66666667	1	1.932275125	7.752133333	1.112333333
CA8c-3-2	CA8c	Control	3	1	16	1	2.188906608	0.430833333	0.935
CA8c-3-3	CA8c	Control	3	1.666666667	24.33333333	1	2.326364833	0.444633333	1.001333333
CA8c-3-4	CA8c	Control	3	1	25.66666667	1	2.52417073	0.461	1.136666667
CA8c-3-5	CA8c	Control	3	1	28	1	3.191281041	0.423666667	1.313
CA8c-3-6	CA8c	Control	3	1	15.5	0	2.205157903	0.416	0.905666667
CA8c-3-7	CA8c	Control	3	1	24	1	1.927032475	0.3975	0.7695
CA8c-3-8	CA8c	Control	3	1	25	1	2.185124209	0.40745	0.9085
CA8c-3-9	CA8c	Control	3	1	22.33333333	1	3.849696248	0.6117	2.5125
CA8c-6-1	CA8c	Control	6	1.666666667	26.5	2	2.455941901	0.57205	1.317666667
CA8c-6-10	CA8c	Control	6	1	27	0	1.861098198	0.5209	0.9595
CA8c-6-2	CA8c	Control	6	1	22	0	2.374779684	0.4986	1.181
CA8c-6-3	CA8c	Control	6	1	23.66666667	0	2.863215405	0.4174	1.1865
CA8c-6-4	CA8c	Control	6	1.333333333	21.5	2	3.281273692	7.543266667	1.1118
CA8c-6-5	CA8c	Control	6	1.333333333	21.5	2	3.301306351	0.50985	1.7155
CA8c-6-6	CA8c	Control	6	1	20.33333333	0	1.384702342	0.53	0.791666667
CA8c-6-7	CA8c	Control	6	1	26.33333333	1	3.914842093	0.74885	2.944
CA8c-6-8	CA8c	Control	6	1	21	0	2.159854539	0.53025	1.1135
CA8c-6-9	CA8c	Control	6	1	21.5	0	1.898211756	0.49835	0.944
CS8-a-9-1	CS8a	Control	9	1	27.66666667	1	3.585481178	0.3567	1.256333333
CS8-a-9-10	CS8a	Control	9	2.333333333	30.33333333	1	3.906918415	0.438766667	1.721333333
CS8-a-9-2	CS8a	Control	9	2	31	1	7.305680861	0.4895	3.626333333
CS8-a-9-3	CS8a	Control	9	2	22	0	3.221705824	0.414633333	1.303666667
CS8-a-9-4	CS8a	Control	9	1	15.33333333	0	3.24600168	0.3759	1.234333333
CS8-a-9-5	CS8a	Control	9	2.333333333	34.66666667	3	6.260018226	0.4121	2.489333333
CS8-a-9-6	CS8a	Control	9	1	19.33333333	0	1.695479699	0.444433333	0.741666667
CS8-a-9-7	CS8a	Control	9	1.666666667	30.33333333	2	4.114786309	0.353333333	1.523666667
CS8-a-9-8	CS8a	Control	9	2	28	2	4.147367394	0.4358	1.779666667
CS8-a-9-9	CS8a	Control	9	1.666666667	24	2	5.939891021	0.401466667	2.332
CS8-b-9-1	CS8b	Control	9	2	24.66666667	0	4.197522309	0.348966667	1.49
CS8-b-9-10	CS8b	Control	9	1	23.33333333	0	2.552847018	0.3487	0.889
CS8-b-9-2	CS8b	Control	9	1.333333333	23	0	2.220755761	0.338866667	0.751
CS8-b-9-3	CS8b	Control	9	1	19.66666667	0	2.851863825	0.421133333	1.218
CS8-b-9-4	CS8b	Control	9	1	22	1	5.528005439	0.5033	2.77
CS8-b-9-5	CS8b	Control	9	1	22	1	3.932410977	0.4986	1.943666667
CS8-b-9-6	CS8b	Control	9	2	30	1	3.300352547	0.400033333	1.290333333
CS8-b-9-7	CS8b	Control	9	1	25	1	5.487235476	0.507933333	2.811
CS8-b-9-8	CS8b	Control	9	1.333333333	26	0	2.453855576	0.323766667	0.794666667
CS8-b-9-9	CS8b	Control	9	2	35.33333333	0	6.26707794	0.365766667	2.285333333
CS8-c-9-1	CS8c	Control	9	1.666666667	30.33333333	2	6.378669203	0.5676	3.807666667
CS8-c-9-10	CS8c	Control	9	2	65.33333333	2	7.055344506	0.491533333	3.531
CS8-c-9-2	CS8c	Control	9	1	20	0	5.873333633	0.484466667	2.638
CS8-c-9-3	CS8c	Control	9	2	33	1	5.145739635	0.586366667	3.118333333
CS8-c-9-4	CS8c	Control	9	1.666666667	34.5	2	3.426338425	0.3603	1.783666667
CS8-c-9-5	CS8c	Control	9	1	36	2	3.359954364	0.2474	1.473333333
CS8-c-9-6	CS8c	Control	9	1	30.33333333	0	4.054025094	0.3984	1.627333333
CS8-c-9-7	CS8c	Control	9	2	36.33333333	0	3.951869782	0.403433333	1.6
CS8-c-9-8	CS8c	Control	9	1	50	0	3.351708476	0.338066667	1.130666667
CS8-c-9-9	CS8c	Control	9	2	59	2	3.963374726	0.4521	2.083666667
CS8a-1-1	CS8a	Control	1	1	14.66666667	2	4.063608721	0.439266667	1.767666667
CS8a-1-10	CS8a	Control	1	1	12	0	3.154760528	0.4271	1.346
CS8a-1-2	CS8a	Control	1	1.666666667	14.66666667	0	2.36254531	0.476966667	1.118666667
CS8a-1-3	CS8a	Control	1	2	18	4	3.711643091	0.387666667	1.446
CS8a-1-4	CS8a	Control	1	2	16.5	4	2.775458971	0.493866667	1.330666667
CS8a-1-5	CS8a	Control	1	1.666666667	15	3	3.781921035	0.520333333	1.912
CS8a-1-6	CS8a	Control	1	2	17	3	2.36906607	0.450066667	0.992666667
CS8a-1-7	CS8a	Control	1	2	19.33333333	1	2.76170307	0.443933333	1.189
CS8a-1-8	CS8a	Control	1	1	15.66666667	2	2.424475788	0.4464	1.036666667
CS8a-1-9	CS8a	Control	1	2	17	1	3.935877343	0.556433333	2.213666667
CS8a-3-1	CS8a	Control	3	1.666666667	27	2	2.754970428	0.57445	1.5935
CS8a-3-10	CS8a	Control	3	1.666666667	32.66666667	4	3.057145313	7.679766667	1.412666667
CS8a-3-2	CS8a	Control	3	2	25.66666667	3	2.229915437	0.58485	1.3813
CS8a-3-3	CS8a	Control	3	1	30.66666667	2	4.14430448	0.6394	2.623
CS8a-3-4	CS8a	Control	3	2.333333333	29.66666667	4	3.543699567	0.3696	1.333
CS8a-3-5	CS8a	Control	3	2	47.66666667	2	2.444014909	0.43065	1.145733333
CS8a-3-6	CS8a	Control	3	1	21.33333333	1	3.866204163	0.5332	2.0935
CS8a-3-7	CS8a	Control	3	2	24.5	4	2.525771683	0.54395	1.358
CS8a-3-8	CS8a	Control	3	2	24	2	3.939345941	0.58225	2.1495
CS8a-3-9	CS8a	Control	3	1	24	1	4.886357605	0.67545	3.264
CS8a-6-1	CS8a	Control	6	2	30	1	2.217917992	0.29285	0.7783
CS8a-6-10	CS8a	Control	6	2	30.33333333	2	5.098437383	0.4404	2.1665
CS8a-6-2	CS8a	Control	6	1.666666667	24.33333333	2	9.021132961	0.58245	5.1805
CS8a-6-3	CS8a	Control	6	1	23	4	6.912983391	0.5922	4.0515
CS8a-6-4	CS8a	Control	6	1	30.66666667	1	4.318995651	0.6533	2.81
CS8a-6-5	CS8a	Control	6	2	24.33333333	3	4.365770326	0.70605	3.1565
CS8a-6-6	CS8a	Control	6	1	24.66666667	0	2.791946774	7.797033333	1.517666667
CS8a-6-7	CS8a	Control	6	1	28.33333333	1	2.624198322	0.5622	1.4655
CS8a-6-8	CS8a	Control	6	2	33	2	3.702598385	0.50545	1.579666667
CS8a-6-9	CS8a	Control	6	1	26	1	4.054680919	7.652233333	2.245733333
CS8b-1-1	CS8b	Control	1	1	21	0	2.254968857	0.4743	1.026
CS8b-1-10	CS8b	Control	1	2	19.5	3	7.844885992	0.5135	3.546
CS8b-1-2	CS8b	Control	1	1	15.33333333	1	2.990118784	0.4954	1.393333333
CS8b-1-3	CS8b	Control	1	1	13.33333333	2	2.986030174	0.499866667	1.466
CS8b-1-4	CS8b	Control	1	1	13.5	1	2.661506232	0.469666667	1.230333333
CS8b-1-5	CS8b	Control	1	2	20	3	3.220808052	0.390466667	1.362
CS8b-1-6	CS8b	Control	1	1.333333333	19.66666667	2	2.253962711	0.411833333	0.903333333
CS8b-1-7	CS8b	Control	1	2	13	2	3.200325007	0.4814	1.574666667
CS8b-1-8	CS8b	Control	1	2	13.33333333	3	3.284051399	0.3352	1.220666667
CS8b-1-9	CS8b	Control	1	2	11.5	2	3.6175376	0.425266667	1.522333333
CS8b-3-1	CS8b	Control	3	1	33	0	1.689335654	0.5062	0.879
CS8b-3-10	CS8b	Control	3	1.666666667	40	2	2.384067739	0.3835	0.914
CS8b-3-2	CS8b	Control	3	1	36	2	5.00796945	0.3905	1.105333333
CS8b-3-3	CS8b	Control	3	2	48	1	3.637240817	0.46805	1.773
CS8b-3-4	CS8b	Control	3	1	25.33333333	1	2.582306906	0.37655	0.967
CS8b-3-5	CS8b	Control	3	1	21	0	1.100172313	7.729866667	0.653166667
CS8b-3-6	CS8b	Control	3	1	23.5	0	1.618007653	0.52755	0.8505
CS8b-3-7	CS8b	Control	3	2	29.5	3	3.310885102	0.574	1.905666667
CS8b-3-8	CS8b	Control	3	1	19	1	3.029825971	0.67955	2.0515
CS8b-3-9	CS8b	Control	3	2	26.33333333	1	4.842237434	0.57145	2.7635
CS8b-6-1	CS8b	Control	6	2	24.33333333	3	4.552748526	0.5688	2.769466667
CS8b-6-10	CS8b	Control	6	1.333333333	35.66666667	2	8.456534445	0.5409	4.6135
CS8b-6-2	CS8b	Control	6	1.666666667	41	3	7.408666291	0.4677	3.1315
CS8b-6-3	CS8b	Control	6	1	40	2	7.319871688	0.7481	5.6155
CS8b-6-4	CS8b	Control	6	2	32	1	6.626340066	0.7221	4.8255
CS8b-6-5	CS8b	Control	6	2	41.33333333	1	6.816054117	0.61645	4.232
CS8b-6-6	CS8b	Control	6	1.666666667	44.33333333	1	4.628008416	7.742733333	1.095
CS8b-6-7	CS8b	Control	6	1.333333333	27.5	1	5.302366345	0.3538	2.8775
CS8b-6-8	CS8b	Control	6	1.666666667	30.5	2	5.745834004	0.5532	3.167
CS8b-6-9	CS8b	Control	6	2.666666667	35	3	6.21791028	0.54385	3.4035
CS8c-1-1	CS8c	Control	1	1.666666667	17.66666667	3	3.935972296	0.4715	1.665666667
CS8c-1-10	CS8c	Control	1	1	27	4	3.687890858	0.450233333	1.778333333
CS8c-1-2	CS8c	Control	1	1.666666667	15.66666667	3	3.357896483	0.647033333	2.094666667
CS8c-1-3	CS8c	Control	1	1	15.5	1	2.577636152	0.456966667	1.149666667
CS8c-1-4	CS8c	Control	1	2	24	2	3.534834249	0.378933333	2.152666667
CS8c-1-5	CS8c	Control	1	2	24.33333333	4	6.740947668	0.441966667	2.993666667
CS8c-1-6	CS8c	Control	1	1	20	1	3.717775152	0.497766667	1.866666667
CS8c-1-7	CS8c	Control	1	2	15.33333333	4	4.392070501	0.454166667	1.897666667
CS8c-1-8	CS8c	Control	1	1	13.5	0	1.806821506	0.4552	0.797
CS8c-1-9	CS8c	Control	1	1	15	0	2.121606064	0.4301	0.882666667
CS8c-3-1	CS8c	Control	3	1	24.33333333	0	2.030104494	0.45145	0.916
CS8c-3-10	CS8c	Control	3	1	17.5	0	1.928891835	0.4342	0.826
CS8c-3-2	CS8c	Control	3	1	17.5	2	5.535342064	0.5892	3.3912
CS8c-3-3	CS8c	Control	3	1	18	1	3.636469361	0.627	2.2905
CS8c-3-4	CS8c	Control	3	1	20	1	2.932619567	0.6868	2.0155
CS8c-3-5	CS8c	Control	3	1	21.5	0	1.867918487	0.54935	1.01
CS8c-3-6	CS8c	Control	3	1	18	0	2.72199431	0.5761	1.5775
CS8c-3-7	CS8c	Control	3	2	21	2	3.627766872	7.774766667	1.959333333
CS8c-3-8	CS8c	Control	3	1	18.5	1	3.057369529	0.5386	1.6445
CS8c-3-9	CS8c	Control	3	2	30.5	3	9.400469967	0.6119	6.0565
CS8c-6-1	CS8c	Control	6	1.666666667	59.66666667	4	2.604168082	7.8808	1.880666667
CS8c-6-10	CS8c	Control	6	1	30	2	3.798304404	0.53495	2.0315
CS8c-6-2	CS8c	Control	6	2	45.5	2	3.051401964	0.5771	1.765
CS8c-6-3	CS8c	Control	6	2	49	2	2.579880597	0.2746	0.859666667
CS8c-6-4	CS8c	Control	6	2.333333333	58	2	4.821065426	0.46345	2.2355
CS8c-6-5	CS8c	Control	6	2.333333333	23.5	1	7.4152649	0.4667	3.207
CS8c-6-6	CS8c	Control	6	1	11.5	2	5.243283886	7.698966667	2.9412
CS8c-6-7	CS8c	Control	6	2	34.66666667	3	6.351433906	0.51245	3.5035
CS8c-6-8	CS8c	Control	6	1.666666667	40.66666667	2	3.234339978	0.56985	1.837666667
CS8c-6-9	CS8c	Control	6	2	42	2	4.170258202	0.57745	2.316
S8a-1-1	S8a	Sexual	3	2	24.33333333	2	5.307059034	0.519766667	2.753666667
S8a-1-10	S8a	Sexual	3	2	27.5	2	6.735452539	0.572433333	3.989
S8a-1-2	S8a	Sexual	3	2	27.66666667	2	6.057788749	0.507666667	3.075333333
S8a-1-3	S8a	Sexual	3	2	27	1	5.007838272	0.507166667	2.527666667
S8a-1-4	S8a	Sexual	3	2	25.5	2	7.774842843	0.5306	4.155
S8a-1-5	S8a	Sexual	3	2	24.5	2	6.580421359	0.582033333	4.008666667
S8a-1-6	S8a	Sexual	3	2	22	2	5.837559151	0.584266667	3.521666667
S8a-1-7	S8a	Sexual	3	2	33	2	5.977537445	0.5905	3.612666667
S8a-1-8	S8a	Sexual	3	2	26.33333333	1	6.412159479	0.578733333	3.961333333
S8a-1-9	S8a	Sexual	3	2	28.66666667	2	5.867243552	0.579333333	3.466666667
S8a-6-1	S8a	Sexual	6	3	25	1	13.68409051	0.439133333	5.768
S8a-6-10	S8a	Sexual	6	2	23.5	1	9.350152033	0.467233333	4.295
S8a-6-2	S8a	Sexual	6	2.666666667	25	1	20.01620089	0.5009	11.95
S8a-6-3	S8a	Sexual	6	2.333333333	25.5	1	10.22324674	0.357566667	3.658333333
S8a-6-4	S8a	Sexual	6	2	23	3	10.17206299	0.408933333	4.143666667
S8a-6-5	S8a	Sexual	6	2.333333333	26.5	2	9.857853412	0.414	4.100666667
S8a-6-6	S8a	Sexual	6	2	23	2	13.47719719	0.4781	6.661666667
S8a-6-7	S8a	Sexual	6	2	30	1	12.76298127	0.342266667	4.375
S8a-6-8	S8a	Sexual	6	3	27.5	1	10.0426554	0.417366667	4.191666667
S8a-6-9	S8a	Sexual	6	2.333333333	24	1	10.06183609	0.374433333	3.690333333
S8a-9-1	S8a	Sexual	9	3	29.66666667	0	5.765843494	0.495933333	2.471666667
S8a-9-10	S8a	Sexual	9	2	28.33333333	3	7.532030933	0.3938	3.164666667
S8a-9-2	S8a	Sexual	9	2	25	3	6.561284615	0.304566667	2.375666667
S8a-9-3	S8a	Sexual	9	2	24.33333333	3	6.173704626	0.3908	2.822666667
S8a-9-4	S8a	Sexual	9	2.666666667	29.33333333	2	6.324465884	0.399666667	2.454333333
S8a-9-5	S8a	Sexual	9	2.333333333	23.33333333	2	7.759492976	0.338166667	3.248
S8a-9-6	S8a	Sexual	9	2.666666667	23.66666667	2	7.456075327	0.4081	3.032666667
S8a-9-7	S8a	Sexual	9	2.666666667	25.66666667	2	7.548175282	0.4418	3.323
S8a-9-8	S8a	Sexual	9	3.333333333	27.66666667	2	9.233183728	0.351833333	3.216666667
S8a-9-9	S8a	Sexual	9	2.333333333	23.66666667	2	5.09514297	0.410933333	3.273666667
S8b-1-1	S8b	Sexual	1	2	31	2	6.431170151	0.5666	3.759
S8b-1-10	S8b	Sexual	1	1	22	0	3.438534736	0.517933333	1.75
S8b-1-2	S8b	Sexual	1	2	30.5	1	6.316970455	0.568966667	4.016666667
S8b-1-3	S8b	Sexual	1	2	27.5	3	4.869616934	0.5198	2.517666667
S8b-1-4	S8b	Sexual	1	2	27.5	1	5.14680184	0.508966667	2.634
S8b-1-5	S8b	Sexual	1	2	31.66666667	1	4.289213272	0.497033333	2.13
S8b-1-6	S8b	Sexual	1	2	28	2	5.275919488	0.521566667	2.736333333
S8b-1-7	S8b	Sexual	1	2	30	2	5.617467513	0.4721	2.610666667
S8b-1-8	S8b	Sexual	1	2	34	2	4.689903138	0.479733333	2.235333333
S8b-1-9	S8b	Sexual	1	2	29.5	3	4.74341409	0.468233333	2.18
S8b-3-1	S8b	Sexual	3	1	24	0	8.458073472	0.5961	1.885
S8b-3-10	S8b	Sexual	3	2	26	1	7.31446644	0.513966667	2.478333333
S8b-3-2	S8b	Sexual	3	1	25.66666667	0	5.993424518	0.5901	1.863
S8b-3-3	S8b	Sexual	3	2	21	2	6.5207829	0.458	2.968333333
S8b-3-4	S8b	Sexual	3	2	21.33333333	1	6.501492537	0.5123	3.228
S8b-3-5	S8b	Sexual	3	2.333333333	28.66666667	3	7.643928396	0.415866667	2.622333333
S8b-3-6	S8b	Sexual	3	2	21.66666667	0	11.34457511	0.5964	1.339333333
S8b-3-7	S8b	Sexual	3	1	21	1	7.841393805	0.530833333	4.166333333
S8b-3-8	S8b	Sexual	3	1	24	0	8.779290962	0.581533333	3.043666667
S8b-3-9	S8b	Sexual	3	2	26	1	5.412379553	0.5279	3.526333333
S8b-6-1	S8b	Sexual	6	3	26.5	1	9.035320501	0.422633333	3.794333333
S8b-6-10	S8b	Sexual	6	3	20	1	9.242342116	0.4709	4.154
S8b-6-2	S8b	Sexual	6	3.666666667	21	2	10.22072902	0.3351	3.401666667
S8b-6-3	S8b	Sexual	6	3	25.5	3	7.435490611	0.327866667	2.901333333
S8b-6-4	S8b	Sexual	6	2.666666667	38	2	7.412310479	0.5447	4.173666667
S8b-6-5	S8b	Sexual	6	2	14.5	1	7.616970526	0.5102	3.839666667
S8b-6-6	S8b	Sexual	6	3	24.5	3	7.93798474	0.350933333	2.759666667
S8b-6-7	S8b	Sexual	6	3	26	1	8.770002038	0.3952	3.463
S8b-6-8	S8b	Sexual	6	3	22	2	12.68877708	0.438366667	5.149666667
S8b-6-9	S8b	Sexual	6	3	20	3	9.453813596	0.365866667	3.370333333
S8b-9-1	S8b	Sexual	9	2	29	0	7.656718903	0.5322	2.590333333
S8b-9-10	S8b	Sexual	9	2.666666667	24.33333333	1	4.052217184	0.5113	2.905333333
S8b-9-2	S8b	Sexual	9	2.666666667	27.66666667	0	6.141394414	0.565266667	2.282
S8b-9-3	S8b	Sexual	9	2	22.66666667	1	9.649933281	0.495166667	3.348333333
S8b-9-4	S8b	Sexual	9	1.666666667	27	1	6.002829238	0.5099	3.159666667
S8b-9-5	S8b	Sexual	9	2.333333333	31.66666667	1	6.92966057	0.504633333	3.49693771
S8b-9-6	S8b	Sexual	9	1.666666667	26.66666667	1	8.716092605	0.475566667	3.935666667
S8b-9-7	S8b	Sexual	9	1.666666667	33.66666667	1	7.984054356	0.4639	3.436666667
S8b-9-8	S8b	Sexual	9	2	31.66666667	1	8.00947683	0.4337	2.892333333
S8b-9-9	S8b	Sexual	9	2.666666667	29	1	4.90365572	0.4412	4.107
S8c-1-1	S8c	Sexual	1	2	31	1	4.865707188	0.478533333	2.305
S8c-1-10	S8c	Sexual	1	2	0	3	5.896401708	0.516366667	3.066333333
S8c-1-2	S8c	Sexual	1	2	29	2	4.190825692	0.492433333	2.035
S8c-1-3	S8c	Sexual	1	2	28.5	3	5.423574737	0.496666667	2.692333333
S8c-1-4	S8c	Sexual	1	2	25	1	4.093997412	0.4857	1.979333333
S8c-1-5	S8c	Sexual	1	2	26	3	4.924258537	0.473466667	2.331666667
S8c-1-6	S8c	Sexual	1	2	30	1	4.581638062	0.4592	2.1
S8c-1-7	S8c	Sexual	1	2	27	1
S8c-1-8	S8c	Sexual	1	2	35.5	2	6.114856921	0.521433333	3.163333333
S8c-1-9	S8c	Sexual	1	2		1	5.684863036	0.532966667	3.09
S8c-3-1	S8c	Sexual	3	2	32.33333333	3	6.499291992	0.3981	2.112666667
S8c-3-10	S8c	Sexual	3	2	34.5	3	2.958789541	0.381933333	2.246666667
S8c-3-2	S8c	Sexual	3	2	25.5	3	7.266056307	0.397833333	2.617
S8c-3-3	S8c	Sexual	3	2	26	3	5.38625606	0.419366667	2.676666667
S8c-3-4	S8c	Sexual	3	2		3	5.615013815	0.400066667	3.454666667
S8c-3-5	S8c	Sexual	3	2	33	2	5.498798572	0.4596	2.772
S8c-3-6	S8c	Sexual	3	2	35	3	5.312952335	0.4526	3.284333333
S8c-3-7	S8c	Sexual	3	2	41	3	9.113470865	0.4354	2.755
S8c-3-8	S8c	Sexual	3	2.666666667	39	4	5.841075387	0.465733333	2.792333333
S8c-3-9	S8c	Sexual	3	2	33	2	3.348658017	0.435333333	1.982333333
S8c-6-1	S8c	Sexual	6	3	30.5	4	6.149929782	0.414666667	2.537333333
S8c-6-10	S8c	Sexual	6	2.666666667	33.5	3	7.540185726	0.419833333	3.122
S8c-6-2	S8c	Sexual	6	2.666666667	17.5	1	7.11963897	0.498933333	3.554
S8c-6-3	S8c	Sexual	6	2	32	3	6.691441974	0.3657	3.162
S8c-6-4	S8c	Sexual	6	2.666666667	29	1	7.386911387	0.466866667	3.413666667
S8c-6-5	S8c	Sexual	6	3	47	3	10.8816372	0.458833333	4.479
S8c-6-6	S8c	Sexual	6	2.333333333	231	4	8.842457881	0.446866667	3.777
S8c-6-7	S8c	Sexual	6	3	64.5	4	8.484875393	0.403066667	3.315
S8c-6-8	S8c	Sexual	6	2.666666667	41.5	4	7.717133616	0.383466667	3.036
S8c-6-9	S8c	Sexual	6	2.666666667	43	3	8.28685259	0.298633333	3.828
S8c-9-1	S8c	Sexual	9	2	35.33333333	3	6.656974389	0.453133333	2.785
S8c-9-10	S8c	Sexual	9	3	33	1	5.002114971	0.554333333	2.747666667
S8c-9-2	S8c	Sexual	9	2	35.66666667	3	5.816549961	0.417466667	2.370666667
S8c-9-3	S8c	Sexual	9	2.333333333	36.5	2	6.471394721	0.3996	2.590333333
S8c-9-4	S8c	Sexual	9	2.666666667	31.66666667	3	6.532645795	0.351966667	2.573666667
S8c-9-5	S8c	Sexual	9	3	26.33333333	1	7.403965801	0.5266	3.267333333
S8c-9-6	S8c	Sexual	9	3	26.66666667	1	6.99494142	0.489566667	3.502333333
S8c-9-7	S8c	Sexual	9	2.333333333	51	3	9.238765108	0.425533333	2.470666667
S8c-9-8	S8c	Sexual	9	2.333333333	28.33333333	3	5.61199868	0.448666667	2.850333333
S8c-9-9	S8c	Sexual	9	2.333333333	34	2	6.326003014	0.494233333	2.706666667
S8d-3-1	S8d	Sexual	3	1	20.33333333	0	3.302210512	0.542566667	1.483333333
S8d-3-10	S8d	Sexual	3	1	37.5	0	3.896632132	0.521966667	2.91
S8d-3-2	S8d	Sexual	3	1	29.66666667	0	6.758908503	0.484233333	1.282333333
S8d-3-3	S8d	Sexual	3	1	24	0	4.528919118	0.4969	0.94
S8d-3-4	S8d	Sexual	3	2	35	1	4.034574394	0.502766667	3.461333333
S8d-3-5	S8d	Sexual	3	1	27	1
S8d-3-6	S8d	Sexual	3	1	26	0	6.047076218	0.3924	1.148666667
S8d-3-7	S8d	Sexual	3	2	28.66666667	0	5.187077265	0.4687	1.286666667
S8d-3-8	S8d	Sexual	3	2	32	0	4.891283367	0.540033333	1.247
S8d-3-9	S8d	Sexual	3	1.666666667	29.5	0	4.366097586	0.524466667	1.386666667
S8d-6-1	S8d	Sexual	6	2.666666667	20	1	10.82867165	0.549366667	5.828333333
S8d-6-10	S8d	Sexual	6	3	26	1	5.315211127	0.511066667	2.768333333
S8d-6-2	S8d	Sexual	6	3	23.5	1	8.050839748	0.4877	3.975333333
S8d-6-3	S8d	Sexual	6	3	24	1	7.597819092	0.615433333	4.679333333
S8d-6-4	S8d	Sexual	6	2.666666667	21.5	1	5.323477426	0.489366667	2.579666667
S8d-6-5	S8d	Sexual	6	2.666666667	24	1	5.207201934	0.481133333	2.502
S8d-6-6	S8d	Sexual	6	3	23.5	1	7.10416137	0.482733333	3.405
S8d-6-7	S8d	Sexual	6	3	24	1	5.906556161	0.498633333	2.778333333
S8d-6-8	S8d	Sexual	6	3	21.5	1	6.864377416	0.4883	3.263333333
S8d-6-9	S8d	Sexual	6	3	24.5	1	6.270386756	0.521266667	3.215
S8d-9-1	S8d	Sexual	9	1	27	0	2.571752054	0.5319	1.362666667
S8d-9-10	S8d	Sexual	9	1	37	0	2.87318181	0.529833333	1.449333333
S8d-9-2	S8d	Sexual	9	1	24.66666667	0	3.940596483	0.5082	1.909666667
S8d-9-3	S8d	Sexual	9	1	27.33333333	0	6.19898393	0.551666667	1.449666667
S8d-9-4	S8d	Sexual	9	1	28.33333333	0	7.140985126	0.525466667	1.377666667
S8d-9-5	S8d	Sexual	9	1	29.66666667	0	4.528486411	0.494733333	1.090666667
S8d-9-6	S8d	Sexual	9	1	30	0	6.34692287	0.5055	1.183333333
S8d-9-7	S8d	Sexual	9	1	29.33333333	0	5.619963495	0.5421	1.585333333
S8d-9-8	S8d	Sexual	9	1	42.33333333	0	2.700289179	0.5704	1.544666667
S8d-9-9	S8d	Sexual	9	1	44.66666667	0	2.937763668	0.554966667	1.607
