# Supplementary material for: Selection on plastic adherence leads to hyper-multicellular strains and incidental virulence in the budding yeast
Source: eLife. 2023 Nov 2;12:e81056. doi: 10.7554/eLife.81056 (PMC10764007; doi:10.7554/eLife.81056)
Supplement: Figure 3—source data 1. [file elife-81056-fig3-data1.csv]

Larva	Date	Treatment	Strain.Treatment	Time	Dead.is.1	Time.Pup.Included	Dead.1.Pup.Included	Replicate	Assay
2	4.16.21	Control	ControlA	7	0	4	0	A	B
3	4.16.21	Control	ControlA	7	0	4	0	A	B
4	4.16.21	Control	ControlA	7	0	5	0	A	B
5	4.16.21	Control	ControlA	7	0	5	0	A	B
6	4.16.21	Control	ControlA	7	0	5	0	A	B
7	4.16.21	Control	ControlA	7	0	5	0	A	B
8	4.16.21	Control	ControlA	7	0	5	0	A	B
9	4.16.21	Control	ControlA	7	0	6	0	A	B
10	4.16.21	Control	ControlA	7	0	6	0	A	B
11	4.16.21	Control	ControlA	7	0	6	0	A	B
12	4.16.21	Control	ControlA	7	0	6	0	A	B
13	4.16.21	Control	ControlA	7	0	7	0	A	B
14	4.16.21	Control	ControlA	7	0	7	0	A	B
15	4.16.21	Control	ControlA	7	0	7	0	A	B
16	4.16.21	Control	ControlA	7	0	7	0	A	B
17	4.16.21	Control	ControlA	7	0	7	0	A	B
18	4.16.21	Control	ControlA	7	0	7	0	A	B
19	4.16.21	Control	ControlA	7	0	7	0	A	B
20	4.16.21	Control	ControlA	7	0	7	0	A	B
2	4.23.21	Control	ControlA	7	0	3	0	A	C
3	4.23.21	Control	ControlA	7	0	3	0	A	C
4	4.23.21	Control	ControlA	7	0	3	0	A	C
5	4.23.21	Control	ControlA	7	0	3	0	A	C
6	4.23.21	Control	ControlA	7	0	4	0	A	C
7	4.23.21	Control	ControlA	7	0	4	0	A	C
8	4.23.21	Control	ControlA	7	0	4	0	A	C
9	4.23.21	Control	ControlA	7	0	4	0	A	C
10	4.23.21	Control	ControlA	7	0	4	0	A	C
11	4.23.21	Control	ControlA	7	0	5	0	A	C
12	4.23.21	Control	ControlA	7	0	5	0	A	C
13	4.23.21	Control	ControlA	7	0	5	0	A	C
14	4.23.21	Control	ControlA	7	0	5	0	A	C
15	4.23.21	Control	ControlA	7	0	5	0	A	C
16	4.23.21	Control	ControlA	7	0	6	0	A	C
17	4.23.21	Control	ControlA	7	0	7	0	A	C
18	4.23.21	Control	ControlA	7	0	7	0	A	C
19	4.23.21	Control	ControlA	7	0	7	0	A	C
20	4.23.21	Control	ControlA	7	0	7	0	A	C
1	4.25.21	Control	ControlA	7	0	3	0	A	D
2	4.25.21	Control	ControlA	7	0	3	0	A	D
3	4.25.21	Control	ControlA	7	0	4	0	A	D
4	4.25.21	Control	ControlA	7	0	4	0	A	D
5	4.25.21	Control	ControlA	7	0	4	0	A	D
6	4.25.21	Control	ControlA	7	0	4	0	A	D
7	4.25.21	Control	ControlA	7	0	4	0	A	D
8	4.25.21	Control	ControlA	7	0	5	0	A	D
9	4.25.21	Control	ControlA	7	0	5	0	A	D
10	4.25.21	Control	ControlA	7	0	6	0	A	D
11	4.25.21	Control	ControlA	7	0	7	0	A	D
12	4.25.21	Control	ControlA	7	0	7	0	A	D
13	4.25.21	Control	ControlA	7	0	7	0	A	D
14	4.25.21	Control	ControlA	7	0	7	0	A	D
15	4.25.21	Control	ControlA	7	0	7	0	A	D
16	4.25.21	Control	ControlA	7	0	7	0	A	D
17	4.25.21	Control	ControlA	7	0	7	0	A	D
18	4.25.21	Control	ControlA	7	0	7	0	A	D
19	4.25.21	Control	ControlA	7	0	7	0	A	D
20	4.25.21	Control	ControlA	7	0	7	0	A	D
1	4.7.2021	Control	ControlA	7	0	3	0	A	A
2	4.7.2021	Control	ControlA	7	0	4	0	A	A
3	4.7.2021	Control	ControlA	7	0	4	0	A	A
4	4.7.2021	Control	ControlA	7	0	6	0	A	A
5	4.7.2021	Control	ControlA	7	0	6	0	A	A
6	4.7.2021	Control	ControlA	7	0	6	0	A	A
7	4.7.2021	Control	ControlA	7	0	7	0	A	A
8	4.7.2021	Control	ControlA	7	0	7	0	A	A
9	4.7.2021	Control	ControlA	7	0	7	0	A	A
10	4.7.2021	Control	ControlA	7	0	7	0	A	A
11	4.7.2021	Control	ControlA	7	0	7	0	A	A
12	4.7.2021	Control	ControlA	7	0	7	0	A	A
13	4.7.2021	Control	ControlA	7	0	7	0	A	A
14	4.7.2021	Control	ControlA	7	0	7	0	A	A
15	4.7.2021	Control	ControlA	7	0	7	0	A	A
16	4.7.2021	Control	ControlA	7	0	7	0	A	A
17	4.7.2021	Control	ControlA	7	0	7	0	A	A
18	4.7.2021	Control	ControlA	7	0	7	0	A	A
19	4.7.2021	Control	ControlA	7	0	7	0	A	A
20	4.7.2021	Control	ControlA	7	0	7	0	A	A
1	9.16.21	Control	ControlA	7	0	4	0		F
2	9.16.21	Control	ControlA	7	0	4	0		F
3	9.16.21	Control	ControlA	7	0	4	0		F
4	9.16.21	Control	ControlA	7	0	4	0		F
5	9.16.21	Control	ControlA	7	0	5	0		F
6	9.16.21	Control	ControlA	7	0	5	0		F
7	9.16.21	Control	ControlA	7	0	5	0		F
9	9.16.21	Control	ControlA	7	0	6	0		F
10	9.16.21	Control	ControlA	7	0	7	0		F
11	9.16.21	Control	ControlA	7	0	7	0		F
12	9.16.21	Control	ControlA	7	0	7	0		F
13	9.16.21	Control	ControlA	7	0	7	0		F
14	9.16.21	Control	ControlA	7	0	7	0		F
15	9.16.21	Control	ControlA	7	0	7	0		F
16	9.16.21	Control	ControlA	7	0	7	0		F
17	9.16.21	Control	ControlA	7	0	7	0		F
18	9.16.21	Control	ControlA	7	0	7	0		F
19	9.16.21	Control	ControlA	7	0	7	0		F
20	9.16.21	Control	ControlA	7	0	7	0		F
6	9.9.21	Control	ControlA	7	0	3	0		E
7	9.9.21	Control	ControlA	7	0	4	0		E
8	9.9.21	Control	ControlA	7	0	4	0		E
9	9.9.21	Control	ControlA	7	0	4	0		E
10	9.9.21	Control	ControlA	7	0	5	0		E
11	9.9.21	Control	ControlA	7	0	5	0		E
12	9.9.21	Control	ControlA	7	0	5	0		E
13	9.9.21	Control	ControlA	7	0	5	0		E
15	9.9.21	Control	ControlA	7	0	7	0		E
16	9.9.21	Control	ControlA	7	0	7	0		E
17	9.9.21	Control	ControlA	7	0	7	0		E
18	9.9.21	Control	ControlA	7	0	7	0		E
19	9.9.21	Control	ControlA	7	0	7	0		E
20	9.9.21	Control	ControlA	7	0	7	0		E
1	4.16.21	Control	ControlA	1	1	1	1	A	B
1	4.23.21	Control	ControlA	1	1	1	1	A	C
1	9.9.21	Control	ControlA	1	1	1	1		E
2	9.9.21	Control	ControlA	1	1	1	1		E
3	9.9.21	Control	ControlA	1	1	1	1		E
4	9.9.21	Control	ControlA	1	1	1	1		E
5	9.9.21	Control	ControlA	1	1	1	1		E
8	9.16.21	Control	ControlA	6	1	6	1		F
14	9.9.21	Control	ControlA	6	1	6	1		E
10	4.16.21	Control	ControlB	7	0	3	0	B	B
11	4.16.21	Control	ControlB	7	0	4	0	B	B
12	4.16.21	Control	ControlB	7	0	5	0	B	B
13	4.16.21	Control	ControlB	7	0	5	0	B	B
14	4.16.21	Control	ControlB	7	0	5	0	B	B
15	4.16.21	Control	ControlB	7	0	7	0	B	B
16	4.16.21	Control	ControlB	7	0	7	0	B	B
17	4.16.21	Control	ControlB	7	0	7	0	B	B
18	4.16.21	Control	ControlB	7	0	7	0	B	B
19	4.16.21	Control	ControlB	7	0	7	0	B	B
20	4.16.21	Control	ControlB	7	0	7	0	B	B
8	4.23.21	Control	ControlB	7	0	3	0	B	C
9	4.23.21	Control	ControlB	7	0	3	0	B	C
10	4.23.21	Control	ControlB	7	0	4	0	B	C
11	4.23.21	Control	ControlB	7	0	4	0	B	C
12	4.23.21	Control	ControlB	7	0	4	0	B	C
13	4.23.21	Control	ControlB	7	0	4	0	B	C
14	4.23.21	Control	ControlB	7	0	5	0	B	C
15	4.23.21	Control	ControlB	7	0	7	0	B	C
16	4.23.21	Control	ControlB	7	0	7	0	B	C
17	4.23.21	Control	ControlB	7	0	7	0	B	C
18	4.23.21	Control	ControlB	7	0	7	0	B	C
19	4.23.21	Control	ControlB	7	0	7	0	B	C
20	4.23.21	Control	ControlB	7	0	7	0	B	C
1	4.25.21	Control	ControlB	7	0	3	0	B	D
2	4.25.21	Control	ControlB	7	0	3	0	B	D
3	4.25.21	Control	ControlB	7	0	3	0	B	D
4	4.25.21	Control	ControlB	7	0	3	0	B	D
5	4.25.21	Control	ControlB	7	0	4	0	B	D
6	4.25.21	Control	ControlB	7	0	4	0	B	D
7	4.25.21	Control	ControlB	7	0	4	0	B	D
8	4.25.21	Control	ControlB	7	0	4	0	B	D
9	4.25.21	Control	ControlB	7	0	4	0	B	D
10	4.25.21	Control	ControlB	7	0	5	0	B	D
11	4.25.21	Control	ControlB	7	0	5	0	B	D
12	4.25.21	Control	ControlB	7	0	5	0	B	D
13	4.25.21	Control	ControlB	7	0	5	0	B	D
14	4.25.21	Control	ControlB	7	0	5	0	B	D
15	4.25.21	Control	ControlB	7	0	5	0	B	D
16	4.25.21	Control	ControlB	7	0	7	0	B	D
17	4.25.21	Control	ControlB	7	0	7	0	B	D
18	4.25.21	Control	ControlB	7	0	7	0	B	D
19	4.25.21	Control	ControlB	7	0	7	0	B	D
20	4.25.21	Control	ControlB	7	0	7	0	B	D
1	4.7.2021	Control	ControlB	7	0	2	0	B	A
2	4.7.2021	Control	ControlB	7	0	5	0	B	A
3	4.7.2021	Control	ControlB	7	0	6	0	B	A
4	4.7.2021	Control	ControlB	7	0	6	0	B	A
5	4.7.2021	Control	ControlB	7	0	7	0	B	A
6	4.7.2021	Control	ControlB	7	0	7	0	B	A
7	4.7.2021	Control	ControlB	7	0	7	0	B	A
8	4.7.2021	Control	ControlB	7	0	7	0	B	A
9	4.7.2021	Control	ControlB	7	0	7	0	B	A
10	4.7.2021	Control	ControlB	7	0	7	0	B	A
11	4.7.2021	Control	ControlB	7	0	7	0	B	A
12	4.7.2021	Control	ControlB	7	0	7	0	B	A
13	4.7.2021	Control	ControlB	7	0	7	0	B	A
14	4.7.2021	Control	ControlB	7	0	7	0	B	A
15	4.7.2021	Control	ControlB	7	0	7	0	B	A
16	4.7.2021	Control	ControlB	7	0	7	0	B	A
17	4.7.2021	Control	ControlB	7	0	7	0	B	A
18	4.7.2021	Control	ControlB	7	0	7	0	B	A
19	4.7.2021	Control	ControlB	7	0	7	0	B	A
20	4.7.2021	Control	ControlB	7	0	7	0	B	A
2	9.16.21	Control	ControlB	7	0	3	0		F
3	9.16.21	Control	ControlB	7	0	4	0		F
4	9.16.21	Control	ControlB	7	0	4	0		F
5	9.16.21	Control	ControlB	7	0	4	0		F
6	9.16.21	Control	ControlB	7	0	5	0		F
7	9.16.21	Control	ControlB	7	0	6	0		F
8	9.16.21	Control	ControlB	7	0	7	0		F
9	9.16.21	Control	ControlB	7	0	7	0		F
10	9.16.21	Control	ControlB	7	0	7	0		F
11	9.16.21	Control	ControlB	7	0	7	0		F
12	9.16.21	Control	ControlB	7	0	7	0		F
13	9.16.21	Control	ControlB	7	0	7	0		F
14	9.16.21	Control	ControlB	7	0	7	0		F
15	9.16.21	Control	ControlB	7	0	7	0		F
16	9.16.21	Control	ControlB	7	0	7	0		F
17	9.16.21	Control	ControlB	7	0	7	0		F
18	9.16.21	Control	ControlB	7	0	7	0		F
19	9.16.21	Control	ControlB	7	0	7	0		F
20	9.16.21	Control	ControlB	7	0	7	0		F
2	9.9.21	Control	ControlB	7	0	3	0		E
3	9.9.21	Control	ControlB	7	0	4	0		E
4	9.9.21	Control	ControlB	7	0	5	0		E
5	9.9.21	Control	ControlB	7	0	5	0		E
6	9.9.21	Control	ControlB	7	0	5	0		E
7	9.9.21	Control	ControlB	7	0	6	0		E
8	9.9.21	Control	ControlB	7	0	7	0		E
9	9.9.21	Control	ControlB	7	0	7	0		E
10	9.9.21	Control	ControlB	7	0	7	0		E
11	9.9.21	Control	ControlB	7	0	7	0		E
12	9.9.21	Control	ControlB	7	0	7	0		E
13	9.9.21	Control	ControlB	7	0	7	0		E
14	9.9.21	Control	ControlB	7	0	7	0		E
15	9.9.21	Control	ControlB	7	0	7	0		E
16	9.9.21	Control	ControlB	7	0	7	0		E
17	9.9.21	Control	ControlB	7	0	7	0		E
18	9.9.21	Control	ControlB	7	0	7	0		E
19	9.9.21	Control	ControlB	7	0	7	0		E
20	9.9.21	Control	ControlB	7	0	7	0		E
1	4.16.21	Control	ControlB	1	1	1	1	B	B
2	4.16.21	Control	ControlB	1	1	1	1	B	B
3	4.16.21	Control	ControlB	1	1	1	1	B	B
4	4.16.21	Control	ControlB	1	1	1	1	B	B
5	4.16.21	Control	ControlB	1	1	1	1	B	B
1	4.23.21	Control	ControlB	1	1	1	1	B	C
2	4.23.21	Control	ControlB	1	1	1	1	B	C
3	4.23.21	Control	ControlB	1	1	1	1	B	C
4	4.23.21	Control	ControlB	1	1	1	1	B	C
5	4.23.21	Control	ControlB	1	1	1	1	B	C
6	4.23.21	Control	ControlB	1	1	1	1	B	C
1	9.16.21	Control	ControlB	1	1	1	1		F
1	9.9.21	Control	ControlB	1	1	1	1		E
6	4.16.21	Control	ControlB	2	1	2	1	B	B
7	4.16.21	Control	ControlB	2	1	2	1	B	B
7	4.23.21	Control	ControlB	2	1	2	1	B	C
8	4.16.21	Control	ControlB	5	1	5	1	B	B
9	4.16.21	Control	ControlB	5	1	5	1	B	B
2	4.17.21	Control	ControlC	7	0	4	0	C	B
3	4.17.21	Control	ControlC	7	0	4	0	C	B
4	4.17.21	Control	ControlC	7	0	4	0	C	B
5	4.17.21	Control	ControlC	7	0	4	0	C	B
6	4.17.21	Control	ControlC	7	0	4	0	C	B
7	4.17.21	Control	ControlC	7	0	4	0	C	B
8	4.17.21	Control	ControlC	7	0	4	0	C	B
9	4.17.21	Control	ControlC	7	0	5	0	C	B
10	4.17.21	Control	ControlC	7	0	5	0	C	B
11	4.17.21	Control	ControlC	7	0	5	0	C	B
12	4.17.21	Control	ControlC	7	0	5	0	C	B
13	4.17.21	Control	ControlC	7	0	5	0	C	B
14	4.17.21	Control	ControlC	7	0	5	0	C	B
15	4.17.21	Control	ControlC	7	0	7	0	C	B
16	4.17.21	Control	ControlC	7	0	7	0	C	B
17	4.17.21	Control	ControlC	7	0	7	0	C	B
18	4.17.21	Control	ControlC	7	0	7	0	C	B
19	4.17.21	Control	ControlC	7	0	7	0	C	B
20	4.17.21	Control	ControlC	7	0	7	0	C	B
2	4.24.21	Control	ControlC	7	0	3	0	C	C
3	4.24.21	Control	ControlC	7	0	3	0	C	C
4	4.24.21	Control	ControlC	7	0	4	0	C	C
5	4.24.21	Control	ControlC	7	0	4	0	C	C
6	4.24.21	Control	ControlC	7	0	5	0	C	C
7	4.24.21	Control	ControlC	7	0	5	0	C	C
8	4.24.21	Control	ControlC	7	0	5	0	C	C
9	4.24.21	Control	ControlC	7	0	5	0	C	C
10	4.24.21	Control	ControlC	7	0	5	0	C	C
11	4.24.21	Control	ControlC	7	0	6	0	C	C
12	4.24.21	Control	ControlC	7	0	6	0	C	C
13	4.24.21	Control	ControlC	7	0	6	0	C	C
14	4.24.21	Control	ControlC	7	0	7	0	C	C
15	4.24.21	Control	ControlC	7	0	7	0	C	C
16	4.24.21	Control	ControlC	7	0	7	0	C	C
17	4.24.21	Control	ControlC	7	0	7	0	C	C
18	4.24.21	Control	ControlC	7	0	7	0	C	C
19	4.24.21	Control	ControlC	7	0	7	0	C	C
20	4.24.21	Control	ControlC	7	0	7	0	C	C
1	4.25.21	Control	ControlC	7	0	3	0	C	D
2	4.25.21	Control	ControlC	7	0	3	0	C	D
3	4.25.21	Control	ControlC	7	0	4	0	C	D
4	4.25.21	Control	ControlC	7	0	4	0	C	D
5	4.25.21	Control	ControlC	7	0	5	0	C	D
6	4.25.21	Control	ControlC	7	0	5	0	C	D
7	4.25.21	Control	ControlC	7	0	5	0	C	D
8	4.25.21	Control	ControlC	7	0	5	0	C	D
9	4.25.21	Control	ControlC	7	0	5	0	C	D
10	4.25.21	Control	ControlC	7	0	6	0	C	D
11	4.25.21	Control	ControlC	7	0	6	0	C	D
12	4.25.21	Control	ControlC	7	0	7	0	C	D
13	4.25.21	Control	ControlC	7	0	7	0	C	D
14	4.25.21	Control	ControlC	7	0	7	0	C	D
15	4.25.21	Control	ControlC	7	0	7	0	C	D
16	4.25.21	Control	ControlC	7	0	7	0	C	D
17	4.25.21	Control	ControlC	7	0	7	0	C	D
18	4.25.21	Control	ControlC	7	0	7	0	C	D
19	4.25.21	Control	ControlC	7	0	7	0	C	D
20	4.25.21	Control	ControlC	7	0	7	0	C	D
1	9.10.21	Control	ControlC	7	0	4	0		E
2	9.10.21	Control	ControlC	7	0	4	0		E
3	9.10.21	Control	ControlC	7	0	4	0		E
5	9.10.21	Control	ControlC	7	0	5	0		E
6	9.10.21	Control	ControlC	7	0	5	0		E
7	9.10.21	Control	ControlC	7	0	5	0		E
8	9.10.21	Control	ControlC	7	0	5	0		E
9	9.10.21	Control	ControlC	7	0	6	0		E
10	9.10.21	Control	ControlC	7	0	7	0		E
11	9.10.21	Control	ControlC	7	0	7	0		E
12	9.10.21	Control	ControlC	7	0	7	0		E
13	9.10.21	Control	ControlC	7	0	7	0		E
14	9.10.21	Control	ControlC	7	0	7	0		E
15	9.10.21	Control	ControlC	7	0	7	0		E
16	9.10.21	Control	ControlC	7	0	7	0		E
17	9.10.21	Control	ControlC	7	0	7	0		E
18	9.10.21	Control	ControlC	7	0	7	0		E
19	9.10.21	Control	ControlC	7	0	7	0		E
20	9.10.21	Control	ControlC	7	0	7	0		E
19	9.16.21	Control	ControlC	7	0	5	0		F
20	9.16.21	Control	ControlC	7	0	6	0		F
1	4.24.21	Control	ControlC	1	1	1	1	C	C
1	9.16.21	Control	ControlC	1	1	1	1		F
2	9.16.21	Control	ControlC	1	1	1	1		F
3	9.16.21	Control	ControlC	1	1	1	1		F
4	9.16.21	Control	ControlC	1	1	1	1		F
5	9.16.21	Control	ControlC	1	1	1	1		F
6	9.16.21	Control	ControlC	1	1	1	1		F
7	9.16.21	Control	ControlC	1	1	1	1		F
8	9.16.21	Control	ControlC	1	1	1	1		F
9	9.16.21	Control	ControlC	1	1	1	1		F
10	9.16.21	Control	ControlC	1	1	1	1		F
11	9.16.21	Control	ControlC	1	1	1	1		F
12	9.16.21	Control	ControlC	1	1	1	1		F
13	9.16.21	Control	ControlC	1	1	1	1		F
14	9.16.21	Control	ControlC	1	1	1	1		F
15	9.16.21	Control	ControlC	1	1	1	1		F
16	9.16.21	Control	ControlC	1	1	1	1		F
17	9.16.21	Control	ControlC	1	1	1	1		F
18	9.16.21	Control	ControlC	2	1	2	1		F
4	9.10.21	Control	ControlC	5	1	5	1		E
1	4.17.21	Control	ControlC	7	1	7	1	C	B
1	4.24.21	Control	ControlD	7	0	3	0	D	C
2	4.24.21	Control	ControlD	7	0	3	0	D	C
3	4.24.21	Control	ControlD	7	0	4	0	D	C
4	4.24.21	Control	ControlD	7	0	4	0	D	C
5	4.24.21	Control	ControlD	7	0	4	0	D	C
6	4.24.21	Control	ControlD	7	0	4	0	D	C
7	4.24.21	Control	ControlD	7	0	4	0	D	C
8	4.24.21	Control	ControlD	7	0	5	0	D	C
9	4.24.21	Control	ControlD	7	0	5	0	D	C
10	4.24.21	Control	ControlD	7	0	5	0	D	C
11	4.24.21	Control	ControlD	7	0	6	0	D	C
12	4.24.21	Control	ControlD	7	0	6	0	D	C
13	4.24.21	Control	ControlD	7	0	6	0	D	C
14	4.24.21	Control	ControlD	7	0	7	0	D	C
15	4.24.21	Control	ControlD	7	0	7	0	D	C
16	4.24.21	Control	ControlD	7	0	7	0	D	C
17	4.24.21	Control	ControlD	7	0	7	0	D	C
18	4.24.21	Control	ControlD	7	0	7	0	D	C
19	4.24.21	Control	ControlD	7	0	7	0	D	C
20	4.24.21	Control	ControlD	7	0	7	0	D	C
1	4.25.21	Control	ControlD	7	0	3	0	D	D
2	4.25.21	Control	ControlD	7	0	3	0	D	D
3	4.25.21	Control	ControlD	7	0	4	0	D	D
4	4.25.21	Control	ControlD	7	0	4	0	D	D
5	4.25.21	Control	ControlD	7	0	4	0	D	D
6	4.25.21	Control	ControlD	7	0	4	0	D	D
7	4.25.21	Control	ControlD	7	0	5	0	D	D
8	4.25.21	Control	ControlD	7	0	5	0	D	D
9	4.25.21	Control	ControlD	7	0	5	0	D	D
10	4.25.21	Control	ControlD	7	0	5	0	D	D
11	4.25.21	Control	ControlD	7	0	5	0	D	D
12	4.25.21	Control	ControlD	7	0	6	0	D	D
13	4.25.21	Control	ControlD	7	0	6	0	D	D
14	4.25.21	Control	ControlD	7	0	6	0	D	D
15	4.25.21	Control	ControlD	7	0	7	0	D	D
16	4.25.21	Control	ControlD	7	0	7	0	D	D
17	4.25.21	Control	ControlD	7	0	7	0	D	D
18	4.25.21	Control	ControlD	7	0	7	0	D	D
19	4.25.21	Control	ControlD	7	0	7	0	D	D
20	4.25.21	Control	ControlD	7	0	7	0	D	D
3	9.10.21	Control	ControlD	7	0	4	0		E
4	9.10.21	Control	ControlD	7	0	4	0		E
5	9.10.21	Control	ControlD	7	0	4	0		E
6	9.10.21	Control	ControlD	7	0	5	0		E
7	9.10.21	Control	ControlD	7	0	5	0		E
8	9.10.21	Control	ControlD	7	0	6	0		E
9	9.10.21	Control	ControlD	7	0	6	0		E
10	9.10.21	Control	ControlD	7	0	6	0		E
11	9.10.21	Control	ControlD	7	0	7	0		E
12	9.10.21	Control	ControlD	7	0	7	0		E
13	9.10.21	Control	ControlD	7	0	7	0		E
14	9.10.21	Control	ControlD	7	0	7	0		E
15	9.10.21	Control	ControlD	7	0	7	0		E
16	9.10.21	Control	ControlD	7	0	7	0		E
17	9.10.21	Control	ControlD	7	0	7	0		E
18	9.10.21	Control	ControlD	7	0	7	0		E
19	9.10.21	Control	ControlD	7	0	7	0		E
20	9.10.21	Control	ControlD	7	0	7	0		E
8	9.16.21	Control	ControlD	7	0	4	0		F
9	9.16.21	Control	ControlD	7	0	4	0		F
10	9.16.21	Control	ControlD	7	0	4	0		F
11	9.16.21	Control	ControlD	7	0	5	0		F
12	9.16.21	Control	ControlD	7	0	5	0		F
13	9.16.21	Control	ControlD	7	0	5	0		F
14	9.16.21	Control	ControlD	7	0	6	0		F
15	9.16.21	Control	ControlD	7	0	7	0		F
16	9.16.21	Control	ControlD	7	0	7	0		F
17	9.16.21	Control	ControlD	7	0	7	0		F
18	9.16.21	Control	ControlD	7	0	7	0		F
19	9.16.21	Control	ControlD	7	0	7	0		F
20	9.16.21	Control	ControlD	7	0	7	0		F
1	9.10.21	Control	ControlD	1	1	1	1		E
1	9.16.21	Control	ControlD	1	1	1	1		F
2	9.16.21	Control	ControlD	1	1	1	1		F
3	9.16.21	Control	ControlD	1	1	1	1		F
4	9.16.21	Control	ControlD	1	1	1	1		F
5	9.16.21	Control	ControlD	1	1	1	1		F
6	9.16.21	Control	ControlD	2	1	2	1		F
7	9.16.21	Control	ControlD	4	1	4	1		F
2	9.10.21	Control	ControlD	7	1	7	1		E
19	4.16.21	High	H1	7	0	7	0	A	B
20	4.16.21	High	H1	7	0	7	0	A	B
15	4.23.21	High	H1	7	0	7	0	A	C
16	4.23.21	High	H1	7	0	7	0	A	C
17	4.23.21	High	H1	7	0	7	0	A	C
18	4.23.21	High	H1	7	0	7	0	A	C
19	4.23.21	High	H1	7	0	7	0	A	C
20	4.23.21	High	H1	7	0	7	0	A	C
15	4.23.21	High	H1	7	0	7	0	B	C
16	4.23.21	High	H1	7	0	7	0	B	C
17	4.23.21	High	H1	7	0	7	0	B	C
18	4.23.21	High	H1	7	0	7	0	B	C
19	4.23.21	High	H1	7	0	7	0	B	C
20	4.23.21	High	H1	7	0	7	0	B	C
19	4.25.21	High	H1	7	0	7	0	A	D
20	4.25.21	High	H1	7	0	7	0	A	D
19	4.25.21	High	H1	7	0	7	0	B	D
20	4.25.21	High	H1	7	0	7	0	B	D
19	9.16.21	High	H1	7	0	7	0	A	F
20	9.16.21	High	H1	7	0	7	0	A	F
19	9.16.21	High	H1	7	0	7	0	B	F
20	9.16.21	High	H1	7	0	7	0	B	F
15	9.9.21	High	H1	7	0	7	0	A	E
16	9.9.21	High	H1	7	0	7	0	A	E
17	9.9.21	High	H1	7	0	7	0	A	E
18	9.9.21	High	H1	7	0	7	0	A	E
19	9.9.21	High	H1	7	0	7	0	A	E
20	9.9.21	High	H1	7	0	7	0	A	E
11	9.9.21	High	H1	7	0	7	0	B	E
12	9.9.21	High	H1	7	0	7	0	B	E
13	9.9.21	High	H1	7	0	7	0	B	E
14	9.9.21	High	H1	7	0	7	0	B	E
15	9.9.21	High	H1	7	0	7	0	B	E
16	9.9.21	High	H1	7	0	7	0	B	E
17	9.9.21	High	H1	7	0	7	0	B	E
18	9.9.21	High	H1	7	0	7	0	B	E
19	9.9.21	High	H1	7	0	7	0	B	E
20	9.9.21	High	H1	7	0	7	0	B	E
1	4.16.21	High	H1	1	1	1	1	A	B
2	4.16.21	High	H1	1	1	1	1	A	B
3	4.16.21	High	H1	1	1	1	1	A	B
4	4.16.21	High	H1	1	1	1	1	A	B
5	4.16.21	High	H1	1	1	1	1	A	B
6	4.16.21	High	H1	1	1	1	1	A	B
7	4.16.21	High	H1	1	1	1	1	A	B
1	4.16.21	High	H1	1	1	1	1	B	B
2	4.16.21	High	H1	1	1	1	1	B	B
3	4.16.21	High	H1	1	1	1	1	B	B
4	4.16.21	High	H1	1	1	1	1	B	B
5	4.16.21	High	H1	1	1	1	1	B	B
6	4.16.21	High	H1	1	1	1	1	B	B
7	4.16.21	High	H1	1	1	1	1	B	B
8	4.16.21	High	H1	1	1	1	1	B	B
9	4.16.21	High	H1	1	1	1	1	B	B
10	4.16.21	High	H1	1	1	1	1	B	B
11	4.16.21	High	H1	1	1	1	1	B	B
12	4.16.21	High	H1	1	1	1	1	B	B
13	4.16.21	High	H1	1	1	1	1	B	B
14	4.16.21	High	H1	1	1	1	1	B	B
15	4.16.21	High	H1	1	1	1	1	B	B
16	4.16.21	High	H1	1	1	1	1	B	B
17	4.16.21	High	H1	1	1	1	1	B	B
18	4.16.21	High	H1	1	1	1	1	B	B
19	4.16.21	High	H1	1	1	1	1	B	B
20	4.16.21	High	H1	1	1	1	1	B	B
1	4.23.21	High	H1	1	1	1	1	A	C
2	4.23.21	High	H1	1	1	1	1	A	C
3	4.23.21	High	H1	1	1	1	1	A	C
4	4.23.21	High	H1	1	1	1	1	A	C
5	4.23.21	High	H1	1	1	1	1	A	C
6	4.23.21	High	H1	1	1	1	1	A	C
7	4.23.21	High	H1	1	1	1	1	A	C
8	4.23.21	High	H1	1	1	1	1	A	C
9	4.23.21	High	H1	1	1	1	1	A	C
10	4.23.21	High	H1	1	1	1	1	A	C
1	4.23.21	High	H1	1	1	1	1	B	C
2	4.23.21	High	H1	1	1	1	1	B	C
3	4.23.21	High	H1	1	1	1	1	B	C
4	4.23.21	High	H1	1	1	1	1	B	C
5	4.23.21	High	H1	1	1	1	1	B	C
6	4.23.21	High	H1	1	1	1	1	B	C
1	4.25.21	High	H1	1	1	1	1	A	D
1	4.7.2021	High	H1	1	1	1	1	A	A
2	4.7.2021	High	H1	1	1	1	1	A	A
3	4.7.2021	High	H1	1	1	1	1	A	A
1	9.16.21	High	H1	1	1	1	1	A	F
2	9.16.21	High	H1	1	1	1	1	A	F
1	9.16.21	High	H1	1	1	1	1	B	F
1	9.9.21	High	H1	1	1	1	1	A	E
2	9.9.21	High	H1	1	1	1	1	A	E
1	9.9.21	High	H1	1	1	1	1	B	E
8	4.16.21	High	H1	2	1	2	1	A	B
9	4.16.21	High	H1	2	1	2	1	A	B
10	4.16.21	High	H1	2	1	2	1	A	B
11	4.16.21	High	H1	2	1	2	1	A	B
12	4.16.21	High	H1	2	1	2	1	A	B
13	4.16.21	High	H1	2	1	2	1	A	B
14	4.16.21	High	H1	2	1	2	1	A	B
15	4.16.21	High	H1	2	1	2	1	A	B
16	4.16.21	High	H1	2	1	2	1	A	B
11	4.23.21	High	H1	2	1	2	1	A	C
12	4.23.21	High	H1	2	1	2	1	A	C
13	4.23.21	High	H1	2	1	2	1	A	C
14	4.23.21	High	H1	2	1	2	1	A	C
7	4.23.21	High	H1	2	1	2	1	B	C
8	4.23.21	High	H1	2	1	2	1	B	C
9	4.23.21	High	H1	2	1	2	1	B	C
10	4.23.21	High	H1	2	1	2	1	B	C
11	4.23.21	High	H1	2	1	2	1	B	C
12	4.23.21	High	H1	2	1	2	1	B	C
2	4.25.21	High	H1	2	1	2	1	A	D
3	4.25.21	High	H1	2	1	2	1	A	D
4	4.25.21	High	H1	2	1	2	1	A	D
5	4.25.21	High	H1	2	1	2	1	A	D
6	4.25.21	High	H1	2	1	2	1	A	D
7	4.25.21	High	H1	2	1	2	1	A	D
8	4.25.21	High	H1	2	1	2	1	A	D
9	4.25.21	High	H1	2	1	2	1	A	D
10	4.25.21	High	H1	2	1	2	1	A	D
1	4.25.21	High	H1	2	1	2	1	B	D
2	4.25.21	High	H1	2	1	2	1	B	D
3	4.25.21	High	H1	2	1	2	1	B	D
4	4.25.21	High	H1	2	1	2	1	B	D
5	4.25.21	High	H1	2	1	2	1	B	D
6	4.25.21	High	H1	2	1	2	1	B	D
7	4.25.21	High	H1	2	1	2	1	B	D
4	4.7.2021	High	H1	2	1	2	1	A	A
5	4.7.2021	High	H1	2	1	2	1	A	A
3	9.16.21	High	H1	2	1	2	1	A	F
4	9.16.21	High	H1	2	1	2	1	A	F
5	9.16.21	High	H1	2	1	2	1	A	F
6	9.16.21	High	H1	2	1	2	1	A	F
7	9.16.21	High	H1	2	1	2	1	A	F
8	9.16.21	High	H1	2	1	2	1	A	F
9	9.16.21	High	H1	2	1	2	1	A	F
10	9.16.21	High	H1	2	1	2	1	A	F
11	9.16.21	High	H1	2	1	2	1	A	F
12	9.16.21	High	H1	2	1	2	1	A	F
13	9.16.21	High	H1	2	1	2	1	A	F
2	9.16.21	High	H1	2	1	2	1	B	F
3	9.16.21	High	H1	2	1	2	1	B	F
4	9.16.21	High	H1	2	1	2	1	B	F
3	9.9.21	High	H1	2	1	2	1	A	E
4	9.9.21	High	H1	2	1	2	1	A	E
5	9.9.21	High	H1	2	1	2	1	A	E
6	9.9.21	High	H1	2	1	2	1	A	E
7	9.9.21	High	H1	2	1	2	1	A	E
2	9.9.21	High	H1	2	1	2	1	B	E
3	9.9.21	High	H1	2	1	2	1	B	E
4	9.9.21	High	H1	2	1	2	1	B	E
5	9.9.21	High	H1	2	1	2	1	B	E
17	4.16.21	High	H1	3	1	3	1	A	B
11	4.25.21	High	H1	3	1	3	1	A	D
12	4.25.21	High	H1	3	1	3	1	A	D
13	4.25.21	High	H1	3	1	3	1	A	D
14	4.25.21	High	H1	3	1	3	1	A	D
8	4.25.21	High	H1	3	1	3	1	B	D
9	4.25.21	High	H1	3	1	3	1	B	D
10	4.25.21	High	H1	3	1	3	1	B	D
11	4.25.21	High	H1	3	1	3	1	B	D
6	4.7.2021	High	H1	3	1	3	1	A	A
7	4.7.2021	High	H1	3	1	3	1	A	A
8	4.7.2021	High	H1	3	1	3	1	A	A
9	4.7.2021	High	H1	3	1	3	1	A	A
10	4.7.2021	High	H1	3	1	3	1	A	A
11	4.7.2021	High	H1	3	1	3	1	A	A
12	4.7.2021	High	H1	3	1	3	1	A	A
13	4.7.2021	High	H1	3	1	3	1	A	A
14	4.7.2021	High	H1	3	1	3	1	A	A
15	4.7.2021	High	H1	3	1	3	1	A	A
14	9.16.21	High	H1	3	1	3	1	A	F
5	9.16.21	High	H1	3	1	3	1	B	F
6	9.16.21	High	H1	3	1	3	1	B	F
7	9.16.21	High	H1	3	1	3	1	B	F
8	9.16.21	High	H1	3	1	3	1	B	F
9	9.16.21	High	H1	3	1	3	1	B	F
10	9.16.21	High	H1	3	1	3	1	B	F
8	9.9.21	High	H1	3	1	3	1	A	E
9	9.9.21	High	H1	3	1	3	1	A	E
10	9.9.21	High	H1	3	1	3	1	A	E
11	9.9.21	High	H1	3	1	3	1	A	E
6	9.9.21	High	H1	3	1	3	1	B	E
7	9.9.21	High	H1	3	1	3	1	B	E
13	4.23.21	High	H1	4	1	4	1	B	C
15	4.25.21	High	H1	4	1	4	1	A	D
16	4.25.21	High	H1	4	1	4	1	A	D
17	4.25.21	High	H1	4	1	4	1	A	D
12	4.25.21	High	H1	4	1	4	1	B	D
13	4.25.21	High	H1	4	1	4	1	B	D
14	4.25.21	High	H1	4	1	4	1	B	D
15	4.25.21	High	H1	4	1	4	1	B	D
16	4.7.2021	High	H1	4	1	4	1	A	A
17	4.7.2021	High	H1	4	1	4	1	A	A
15	9.16.21	High	H1	4	1	4	1	A	F
16	9.16.21	High	H1	4	1	4	1	A	F
11	9.16.21	High	H1	4	1	4	1	B	F
12	9.16.21	High	H1	4	1	4	1	B	F
13	9.16.21	High	H1	4	1	4	1	B	F
12	9.9.21	High	H1	4	1	4	1	A	E
13	9.9.21	High	H1	4	1	4	1	A	E
8	9.9.21	High	H1	4	1	4	1	B	E
9	9.9.21	High	H1	4	1	4	1	B	E
16	4.25.21	High	H1	5	1	5	1	B	D
18	4.7.2021	High	H1	5	1	5	1	A	A
14	9.16.21	High	H1	5	1	5	1	B	F
15	9.16.21	High	H1	5	1	5	1	B	F
16	9.16.21	High	H1	5	1	5	1	B	F
14	9.9.21	High	H1	5	1	5	1	A	E
10	9.9.21	High	H1	5	1	5	1	B	E
18	4.16.21	High	H1	6	1	6	1	A	B
14	4.23.21	High	H1	6	1	6	1	B	C
18	4.25.21	High	H1	6	1	6	1	A	D
17	4.25.21	High	H1	6	1	6	1	B	D
19	4.7.2021	High	H1	6	1	6	1	A	A
17	9.16.21	High	H1	6	1	6	1	A	F
17	9.16.21	High	H1	6	1	6	1	B	F
18	9.16.21	High	H1	6	1	6	1	B	F
18	4.25.21	High	H1	7	1	7	1	B	D
20	4.7.2021	High	H1	7	1	7	1	A	A
18	9.16.21	High	H1	7	1	7	1	A	F
16	4.16.21	High	H2	7	0	7	0	B	B
17	4.16.21	High	H2	7	0	7	0	B	B
18	4.16.21	High	H2	7	0	7	0	B	B
19	4.16.21	High	H2	7	0	7	0	B	B
20	4.16.21	High	H2	7	0	7	0	B	B
17	4.25.21	High	H2	7	0	7	0	A	D
18	4.25.21	High	H2	7	0	7	0	A	D
19	4.25.21	High	H2	7	0	7	0	A	D
20	4.25.21	High	H2	7	0	7	0	A	D
17	4.25.21	High	H2	7	0	2	0	B	D
18	4.25.21	High	H2	7	0	3	0	B	D
19	4.25.21	High	H2	7	0	7	0	B	D
20	4.25.21	High	H2	7	0	7	0	B	D
19	4.7.2021	High	H2	7	0	7	0	A	A
20	4.7.2021	High	H2	7	0	7	0	A	A
19	9.16.21	High	H2	7	0	7	0	A	F
20	9.16.21	High	H2	7	0	7	0	A	F
15	9.9.21	High	H2	7	0	7	0	A	E
16	9.9.21	High	H2	7	0	7	0	A	E
17	9.9.21	High	H2	7	0	7	0	A	E
18	9.9.21	High	H2	7	0	7	0	A	E
19	9.9.21	High	H2	7	0	7	0	A	E
20	9.9.21	High	H2	7	0	7	0	A	E
15	9.9.21	High	H2	7	0	6	0	B	E
17	9.9.21	High	H2	7	0	7	0	B	E
18	9.9.21	High	H2	7	0	7	0	B	E
19	9.9.21	High	H2	7	0	7	0	B	E
20	9.9.21	High	H2	7	0	7	0	B	E
1	4.16.21	High	H2	1	1	1	1	A	B
2	4.16.21	High	H2	1	1	1	1	A	B
3	4.16.21	High	H2	1	1	1	1	A	B
4	4.16.21	High	H2	1	1	1	1	A	B
5	4.16.21	High	H2	1	1	1	1	A	B
6	4.16.21	High	H2	1	1	1	1	A	B
7	4.16.21	High	H2	1	1	1	1	A	B
8	4.16.21	High	H2	1	1	1	1	A	B
9	4.16.21	High	H2	1	1	1	1	A	B
10	4.16.21	High	H2	1	1	1	1	A	B
1	4.16.21	High	H2	1	1	1	1	B	B
2	4.16.21	High	H2	1	1	1	1	B	B
1	4.23.21	High	H2	1	1	1	1	A	C
2	4.23.21	High	H2	1	1	1	1	A	C
3	4.23.21	High	H2	1	1	1	1	A	C
4	4.23.21	High	H2	1	1	1	1	A	C
5	4.23.21	High	H2	1	1	1	1	A	C
6	4.23.21	High	H2	1	1	1	1	A	C
7	4.23.21	High	H2	1	1	1	1	A	C
8	4.23.21	High	H2	1	1	1	1	A	C
9	4.23.21	High	H2	1	1	1	1	A	C
10	4.23.21	High	H2	1	1	1	1	A	C
1	4.23.21	High	H2	1	1	1	1	B	C
2	4.23.21	High	H2	1	1	1	1	B	C
3	4.23.21	High	H2	1	1	1	1	B	C
4	4.23.21	High	H2	1	1	1	1	B	C
5	4.23.21	High	H2	1	1	1	1	B	C
6	4.23.21	High	H2	1	1	1	1	B	C
7	4.23.21	High	H2	1	1	1	1	B	C
8	4.23.21	High	H2	1	1	1	1	B	C
9	4.23.21	High	H2	1	1	1	1	B	C
10	4.23.21	High	H2	1	1	1	1	B	C
11	4.23.21	High	H2	1	1	1	1	B	C
12	4.23.21	High	H2	1	1	1	1	B	C
1	4.25.21	High	H2	1	1	1	1	A	D
1	4.25.21	High	H2	1	1	1	1	B	D
1	4.7.2021	High	H2	1	1	1	1	A	A
2	4.7.2021	High	H2	1	1	1	1	A	A
3	4.7.2021	High	H2	1	1	1	1	A	A
4	4.7.2021	High	H2	1	1	1	1	A	A
5	4.7.2021	High	H2	1	1	1	1	A	A
6	4.7.2021	High	H2	1	1	1	1	A	A
7	4.7.2021	High	H2	1	1	1	1	A	A
1	9.16.21	High	H2	1	1	1	1	A	F
2	9.16.21	High	H2	1	1	1	1	A	F
3	9.16.21	High	H2	1	1	1	1	A	F
4	9.16.21	High	H2	1	1	1	1	A	F
5	9.16.21	High	H2	1	1	1	1	A	F
1	9.16.21	High	H2	1	1	1	1	B	F
2	9.16.21	High	H2	1	1	1	1	B	F
3	9.16.21	High	H2	1	1	1	1	B	F
4	9.16.21	High	H2	1	1	1	1	B	F
5	9.16.21	High	H2	1	1	1	1	B	F
6	9.16.21	High	H2	1	1	1	1	B	F
7	9.16.21	High	H2	1	1	1	1	B	F
8	9.16.21	High	H2	1	1	1	1	B	F
9	9.16.21	High	H2	1	1	1	1	B	F
10	9.16.21	High	H2	1	1	1	1	B	F
11	9.16.21	High	H2	1	1	1	1	B	F
12	9.16.21	High	H2	1	1	1	1	B	F
13	9.16.21	High	H2	1	1	1	1	B	F
1	9.9.21	High	H2	1	1	1	1	A	E
2	9.9.21	High	H2	1	1	1	1	A	E
1	9.9.21	High	H2	1	1	1	1	B	E
2	9.9.21	High	H2	1	1	1	1	B	E
11	4.16.21	High	H2	2	1	2	1	A	B
12	4.16.21	High	H2	2	1	2	1	A	B
13	4.16.21	High	H2	2	1	2	1	A	B
14	4.16.21	High	H2	2	1	2	1	A	B
15	4.16.21	High	H2	2	1	2	1	A	B
3	4.16.21	High	H2	2	1	2	1	B	B
4	4.16.21	High	H2	2	1	2	1	B	B
5	4.16.21	High	H2	2	1	2	1	B	B
6	4.16.21	High	H2	2	1	2	1	B	B
7	4.16.21	High	H2	2	1	2	1	B	B
11	4.23.21	High	H2	2	1	2	1	A	C
13	4.23.21	High	H2	2	1	2	1	B	C
14	4.23.21	High	H2	2	1	2	1	B	C
15	4.23.21	High	H2	2	1	2	1	B	C
16	4.23.21	High	H2	2	1	2	1	B	C
17	4.23.21	High	H2	2	1	2	1	B	C
18	4.23.21	High	H2	2	1	2	1	B	C
2	4.25.21	High	H2	2	1	2	1	A	D
3	4.25.21	High	H2	2	1	2	1	A	D
4	4.25.21	High	H2	2	1	2	1	A	D
5	4.25.21	High	H2	2	1	2	1	A	D
6	4.25.21	High	H2	2	1	2	1	A	D
7	4.25.21	High	H2	2	1	2	1	A	D
8	4.25.21	High	H2	2	1	2	1	A	D
2	4.25.21	High	H2	2	1	2	1	B	D
3	4.25.21	High	H2	2	1	2	1	B	D
4	4.25.21	High	H2	2	1	2	1	B	D
5	4.25.21	High	H2	2	1	2	1	B	D
6	4.25.21	High	H2	2	1	2	1	B	D
7	4.25.21	High	H2	2	1	2	1	B	D
8	4.7.2021	High	H2	2	1	2	1	A	A
9	4.7.2021	High	H2	2	1	2	1	A	A
10	4.7.2021	High	H2	2	1	2	1	A	A
11	4.7.2021	High	H2	2	1	2	1	A	A
6	9.16.21	High	H2	2	1	2	1	A	F
7	9.16.21	High	H2	2	1	2	1	A	F
8	9.16.21	High	H2	2	1	2	1	A	F
9	9.16.21	High	H2	2	1	2	1	A	F
10	9.16.21	High	H2	2	1	2	1	A	F
11	9.16.21	High	H2	2	1	2	1	A	F
12	9.16.21	High	H2	2	1	2	1	A	F
14	9.16.21	High	H2	2	1	2	1	B	F
15	9.16.21	High	H2	2	1	2	1	B	F
16	9.16.21	High	H2	2	1	2	1	B	F
17	9.16.21	High	H2	2	1	2	1	B	F
18	9.16.21	High	H2	2	1	2	1	B	F
19	9.16.21	High	H2	2	1	2	1	B	F
3	9.9.21	High	H2	2	1	2	1	A	E
4	9.9.21	High	H2	2	1	2	1	A	E
5	9.9.21	High	H2	2	1	2	1	A	E
6	9.9.21	High	H2	2	1	2	1	A	E
7	9.9.21	High	H2	2	1	2	1	A	E
3	9.9.21	High	H2	2	1	2	1	B	E
4	9.9.21	High	H2	2	1	2	1	B	E
5	9.9.21	High	H2	2	1	2	1	B	E
6	9.9.21	High	H2	2	1	2	1	B	E
16	4.16.21	High	H2	3	1	3	1	A	B
17	4.16.21	High	H2	3	1	3	1	A	B
8	4.16.21	High	H2	3	1	3	1	B	B
9	4.16.21	High	H2	3	1	3	1	B	B
12	4.23.21	High	H2	3	1	3	1	A	C
13	4.23.21	High	H2	3	1	3	1	A	C
14	4.23.21	High	H2	3	1	3	1	A	C
15	4.23.21	High	H2	3	1	3	1	A	C
16	4.23.21	High	H2	3	1	3	1	A	C
19	4.23.21	High	H2	3	1	3	1	B	C
20	4.23.21	High	H2	3	1	3	1	B	C
9	4.25.21	High	H2	3	1	3	1	A	D
10	4.25.21	High	H2	3	1	3	1	A	D
11	4.25.21	High	H2	3	1	3	1	A	D
12	4.25.21	High	H2	3	1	3	1	A	D
8	4.25.21	High	H2	3	1	3	1	B	D
9	4.25.21	High	H2	3	1	3	1	B	D
10	4.25.21	High	H2	3	1	3	1	B	D
12	4.7.2021	High	H2	3	1	3	1	A	A
13	4.7.2021	High	H2	3	1	3	1	A	A
14	4.7.2021	High	H2	3	1	3	1	A	A
13	9.16.21	High	H2	3	1	3	1	A	F
14	9.16.21	High	H2	3	1	3	1	A	F
15	9.16.21	High	H2	3	1	3	1	A	F
8	9.9.21	High	H2	3	1	3	1	A	E
7	9.9.21	High	H2	3	1	3	1	B	E
8	9.9.21	High	H2	3	1	3	1	B	E
10	4.16.21	High	H2	4	1	4	1	B	B
11	4.16.21	High	H2	4	1	4	1	B	B
12	4.16.21	High	H2	4	1	4	1	B	B
13	4.16.21	High	H2	4	1	4	1	B	B
14	4.16.21	High	H2	4	1	4	1	B	B
13	4.25.21	High	H2	4	1	4	1	A	D
11	4.25.21	High	H2	4	1	4	1	B	D
12	4.25.21	High	H2	4	1	4	1	B	D
13	4.25.21	High	H2	4	1	4	1	B	D
9	9.9.21	High	H2	4	1	4	1	A	E
10	9.9.21	High	H2	4	1	4	1	A	E
11	9.9.21	High	H2	4	1	4	1	A	E
9	9.9.21	High	H2	4	1	4	1	B	E
10	9.9.21	High	H2	4	1	4	1	B	E
18	4.16.21	High	H2	5	1	5	1	A	B
19	4.16.21	High	H2	5	1	5	1	A	B
17	4.23.21	High	H2	5	1	5	1	A	C
14	4.25.21	High	H2	5	1	5	1	A	D
15	4.25.21	High	H2	5	1	5	1	A	D
16	4.25.21	High	H2	5	1	5	1	A	D
14	4.25.21	High	H2	5	1	5	1	B	D
15	4.7.2021	High	H2	5	1	5	1	A	A
16	4.7.2021	High	H2	5	1	5	1	A	A
17	4.7.2021	High	H2	5	1	5	1	A	A
16	9.16.21	High	H2	5	1	5	1	A	F
17	9.16.21	High	H2	5	1	5	1	A	F
12	9.9.21	High	H2	5	1	5	1	A	E
11	9.9.21	High	H2	5	1	5	1	B	E
20	4.16.21	High	H2	6	1	6	1	A	B
18	4.23.21	High	H2	6	1	6	1	A	C
19	4.23.21	High	H2	6	1	6	1	A	C
15	4.25.21	High	H2	6	1	6	1	B	D
18	9.16.21	High	H2	6	1	6	1	A	F
13	9.9.21	High	H2	6	1	6	1	A	E
12	9.9.21	High	H2	6	1	6	1	B	E
13	9.9.21	High	H2	6	1	6	1	B	E
14	9.9.21	High	H2	6	1	6	1	B	E
15	4.16.21	High	H2	7	1	7	1	B	B
20	4.23.21	High	H2	7	1	7	1	A	C
16	4.25.21	High	H2	7	1	7	1	B	D
18	4.7.2021	High	H2	7	1	7	1	A	A
20	9.16.21	High	H2	7	1	7	1	B	F
14	9.9.21	High	H2	7	1	7	1	A	E
16	9.9.21	High	H2	7	1	7	1	B	E
14	4.16.21	High	H3	7	0	7	0	A	B
15	4.16.21	High	H3	7	0	7	0	A	B
16	4.16.21	High	H3	7	0	7	0	A	B
17	4.16.21	High	H3	7	0	7	0	A	B
18	4.16.21	High	H3	7	0	7	0	A	B
19	4.16.21	High	H3	7	0	7	0	A	B
20	4.16.21	High	H3	7	0	7	0	A	B
17	4.16.21	High	H3	7	0	7	0	B	B
18	4.16.21	High	H3	7	0	7	0	B	B
19	4.16.21	High	H3	7	0	7	0	B	B
20	4.16.21	High	H3	7	0	7	0	B	B
19	4.23.21	High	H3	7	0	7	0	A	C
20	4.23.21	High	H3	7	0	7	0	A	C
16	4.23.21	High	H3	7	0	7	0	B	C
17	4.23.21	High	H3	7	0	7	0	B	C
18	4.23.21	High	H3	7	0	7	0	B	C
19	4.23.21	High	H3	7	0	7	0	B	C
20	4.23.21	High	H3	7	0	7	0	B	C
11	4.25.21	High	H3	7	0	4	0	A	D
12	4.25.21	High	H3	7	0	6	0	A	D
13	4.25.21	High	H3	7	0	6	0	A	D
14	4.25.21	High	H3	7	0	7	0	A	D
15	4.25.21	High	H3	7	0	7	0	A	D
16	4.25.21	High	H3	7	0	7	0	A	D
17	4.25.21	High	H3	7	0	7	0	A	D
18	4.25.21	High	H3	7	0	7	0	A	D
19	4.25.21	High	H3	7	0	7	0	A	D
20	4.25.21	High	H3	7	0	7	0	A	D
15	4.25.21	High	H3	7	0	7	0	B	D
16	4.25.21	High	H3	7	0	7	0	B	D
17	4.25.21	High	H3	7	0	7	0	B	D
18	4.25.21	High	H3	7	0	7	0	B	D
19	4.25.21	High	H3	7	0	7	0	B	D
20	4.25.21	High	H3	7	0	7	0	B	D
17	4.7.2021	High	H3	7	0	6	0	A	A
19	4.7.2021	High	H3	7	0	7	0	A	A
20	4.7.2021	High	H3	7	0	7	0	A	A
15	9.9.21	High	H3	7	0	7	0	A	E
16	9.9.21	High	H3	7	0	7	0	A	E
17	9.9.21	High	H3	7	0	7	0	A	E
18	9.9.21	High	H3	7	0	7	0	A	E
19	9.9.21	High	H3	7	0	7	0	A	E
20	9.9.21	High	H3	7	0	7	0	A	E
11	9.9.21	High	H3	7	0	7	0	B	E
12	9.9.21	High	H3	7	0	7	0	B	E
13	9.9.21	High	H3	7	0	7	0	B	E
14	9.9.21	High	H3	7	0	7	0	B	E
15	9.9.21	High	H3	7	0	7	0	B	E
16	9.9.21	High	H3	7	0	7	0	B	E
17	9.9.21	High	H3	7	0	7	0	B	E
18	9.9.21	High	H3	7	0	7	0	B	E
19	9.9.21	High	H3	7	0	7	0	B	E
20	9.9.21	High	H3	7	0	7	0	B	E
1	4.16.21	High	H3	1	1	1	1	A	B
2	4.16.21	High	H3	1	1	1	1	A	B
3	4.16.21	High	H3	1	1	1	1	A	B
4	4.16.21	High	H3	1	1	1	1	A	B
1	4.16.21	High	H3	1	1	1	1	B	B
2	4.16.21	High	H3	1	1	1	1	B	B
3	4.16.21	High	H3	1	1	1	1	B	B
4	4.16.21	High	H3	1	1	1	1	B	B
1	4.23.21	High	H3	1	1	1	1	A	C
2	4.23.21	High	H3	1	1	1	1	A	C
3	4.23.21	High	H3	1	1	1	1	A	C
4	4.23.21	High	H3	1	1	1	1	A	C
5	4.23.21	High	H3	1	1	1	1	A	C
6	4.23.21	High	H3	1	1	1	1	A	C
7	4.23.21	High	H3	1	1	1	1	A	C
8	4.23.21	High	H3	1	1	1	1	A	C
9	4.23.21	High	H3	1	1	1	1	A	C
1	4.23.21	High	H3	1	1	1	1	B	C
2	4.23.21	High	H3	1	1	1	1	B	C
3	4.23.21	High	H3	1	1	1	1	B	C
4	4.23.21	High	H3	1	1	1	1	B	C
5	4.23.21	High	H3	1	1	1	1	B	C
6	4.23.21	High	H3	1	1	1	1	B	C
7	4.23.21	High	H3	1	1	1	1	B	C
8	4.23.21	High	H3	1	1	1	1	B	C
1	4.25.21	High	H3	1	1	1	1	A	D
2	4.25.21	High	H3	1	1	1	1	A	D
1	4.25.21	High	H3	1	1	1	1	B	D
2	4.25.21	High	H3	1	1	1	1	B	D
1	4.7.2021	High	H3	1	1	1	1	A	A
1	9.16.21	High	H3	1	1	1	1	A	F
2	9.16.21	High	H3	1	1	1	1	A	F
3	9.16.21	High	H3	1	1	1	1	A	F
4	9.16.21	High	H3	1	1	1	1	A	F
5	9.16.21	High	H3	1	1	1	1	A	F
6	9.16.21	High	H3	1	1	1	1	A	F
7	9.16.21	High	H3	1	1	1	1	A	F
8	9.16.21	High	H3	1	1	1	1	A	F
9	9.16.21	High	H3	1	1	1	1	A	F
10	9.16.21	High	H3	1	1	1	1	A	F
11	9.16.21	High	H3	1	1	1	1	A	F
12	9.16.21	High	H3	1	1	1	1	A	F
13	9.16.21	High	H3	1	1	1	1	A	F
14	9.16.21	High	H3	1	1	1	1	A	F
15	9.16.21	High	H3	1	1	1	1	A	F
16	9.16.21	High	H3	1	1	1	1	A	F
17	9.16.21	High	H3	1	1	1	1	A	F
18	9.16.21	High	H3	1	1	1	1	A	F
19	9.16.21	High	H3	1	1	1	1	A	F
20	9.16.21	High	H3	1	1	1	1	A	F
1	9.16.21	High	H3	1	1	1	1	B	F
2	9.16.21	High	H3	1	1	1	1	B	F
3	9.16.21	High	H3	1	1	1	1	B	F
4	9.16.21	High	H3	1	1	1	1	B	F
5	9.16.21	High	H3	1	1	1	1	B	F
6	9.16.21	High	H3	1	1	1	1	B	F
7	9.16.21	High	H3	1	1	1	1	B	F
8	9.16.21	High	H3	1	1	1	1	B	F
9	9.16.21	High	H3	1	1	1	1	B	F
10	9.16.21	High	H3	1	1	1	1	B	F
11	9.16.21	High	H3	1	1	1	1	B	F
12	9.16.21	High	H3	1	1	1	1	B	F
13	9.16.21	High	H3	1	1	1	1	B	F
14	9.16.21	High	H3	1	1	1	1	B	F
15	9.16.21	High	H3	1	1	1	1	B	F
16	9.16.21	High	H3	1	1	1	1	B	F
17	9.16.21	High	H3	1	1	1	1	B	F
18	9.16.21	High	H3	1	1	1	1	B	F
19	9.16.21	High	H3	1	1	1	1	B	F
20	9.16.21	High	H3	1	1	1	1	B	F
5	4.16.21	High	H3	2	1	2	1	A	B
6	4.16.21	High	H3	2	1	2	1	A	B
7	4.16.21	High	H3	2	1	2	1	A	B
8	4.16.21	High	H3	2	1	2	1	A	B
9	4.16.21	High	H3	2	1	2	1	A	B
5	4.16.21	High	H3	2	1	2	1	B	B
6	4.16.21	High	H3	2	1	2	1	B	B
7	4.16.21	High	H3	2	1	2	1	B	B
8	4.16.21	High	H3	2	1	2	1	B	B
9	4.16.21	High	H3	2	1	2	1	B	B
10	4.23.21	High	H3	2	1	2	1	A	C
11	4.23.21	High	H3	2	1	2	1	A	C
12	4.23.21	High	H3	2	1	2	1	A	C
13	4.23.21	High	H3	2	1	2	1	A	C
14	4.23.21	High	H3	2	1	2	1	A	C
3	4.25.21	High	H3	2	1	2	1	A	D
4	4.25.21	High	H3	2	1	2	1	A	D
3	4.25.21	High	H3	2	1	2	1	B	D
4	4.25.21	High	H3	2	1	2	1	B	D
5	4.25.21	High	H3	2	1	2	1	B	D
2	4.7.2021	High	H3	2	1	2	1	A	A
3	4.7.2021	High	H3	2	1	2	1	A	A
4	4.7.2021	High	H3	2	1	2	1	A	A
5	4.7.2021	High	H3	2	1	2	1	A	A
1	9.9.21	High	H3	2	1	2	1	A	E
2	9.9.21	High	H3	2	1	2	1	A	E
3	9.9.21	High	H3	2	1	2	1	A	E
4	9.9.21	High	H3	2	1	2	1	A	E
5	9.9.21	High	H3	2	1	2	1	A	E
6	9.9.21	High	H3	2	1	2	1	A	E
1	9.9.21	High	H3	2	1	2	1	B	E
2	9.9.21	High	H3	2	1	2	1	B	E
3	9.9.21	High	H3	2	1	2	1	B	E
10	4.16.21	High	H3	3	1	3	1	A	B
10	4.16.21	High	H3	3	1	3	1	B	B
11	4.16.21	High	H3	3	1	3	1	B	B
12	4.16.21	High	H3	3	1	3	1	B	B
9	4.23.21	High	H3	3	1	3	1	B	C
10	4.23.21	High	H3	3	1	3	1	B	C
11	4.23.21	High	H3	3	1	3	1	B	C
5	4.25.21	High	H3	3	1	3	1	A	D
6	4.25.21	High	H3	3	1	3	1	B	D
7	4.25.21	High	H3	3	1	3	1	B	D
8	4.25.21	High	H3	3	1	3	1	B	D
6	4.7.2021	High	H3	3	1	3	1	A	A
7	4.7.2021	High	H3	3	1	3	1	A	A
8	4.7.2021	High	H3	3	1	3	1	A	A
9	4.7.2021	High	H3	3	1	3	1	A	A
10	4.7.2021	High	H3	3	1	3	1	A	A
11	4.7.2021	High	H3	3	1	3	1	A	A
12	4.7.2021	High	H3	3	1	3	1	A	A
13	4.7.2021	High	H3	3	1	3	1	A	A
7	9.9.21	High	H3	3	1	3	1	A	E
8	9.9.21	High	H3	3	1	3	1	A	E
4	9.9.21	High	H3	3	1	3	1	B	E
11	4.16.21	High	H3	4	1	4	1	A	B
12	4.16.21	High	H3	4	1	4	1	A	B
15	4.23.21	High	H3	4	1	4	1	A	C
16	4.23.21	High	H3	4	1	4	1	A	C
17	4.23.21	High	H3	4	1	4	1	A	C
12	4.23.21	High	H3	4	1	4	1	B	C
6	4.25.21	High	H3	4	1	4	1	A	D
7	4.25.21	High	H3	4	1	4	1	A	D
8	4.25.21	High	H3	4	1	4	1	A	D
9	4.25.21	High	H3	4	1	4	1	B	D
14	4.7.2021	High	H3	4	1	4	1	A	A
9	9.9.21	High	H3	4	1	4	1	A	E
10	9.9.21	High	H3	4	1	4	1	A	E
11	9.9.21	High	H3	4	1	4	1	A	E
5	9.9.21	High	H3	4	1	4	1	B	E
6	9.9.21	High	H3	4	1	4	1	B	E
7	9.9.21	High	H3	4	1	4	1	B	E
8	9.9.21	High	H3	4	1	4	1	B	E
13	4.16.21	High	H3	5	1	5	1	A	B
13	4.16.21	High	H3	5	1	5	1	B	B
14	4.16.21	High	H3	5	1	5	1	B	B
18	4.23.21	High	H3	5	1	5	1	A	C
13	4.23.21	High	H3	5	1	5	1	B	C
9	4.25.21	High	H3	5	1	5	1	A	D
10	4.25.21	High	H3	5	1	5	1	A	D
10	4.25.21	High	H3	5	1	5	1	B	D
11	4.25.21	High	H3	5	1	5	1	B	D
12	4.25.21	High	H3	5	1	5	1	B	D
15	4.7.2021	High	H3	5	1	5	1	A	A
16	4.7.2021	High	H3	5	1	5	1	A	A
9	9.9.21	High	H3	5	1	5	1	B	E
10	9.9.21	High	H3	5	1	5	1	B	E
15	4.16.21	High	H3	6	1	6	1	B	B
14	4.23.21	High	H3	6	1	6	1	B	C
12	9.9.21	High	H3	6	1	6	1	A	E
13	9.9.21	High	H3	6	1	6	1	A	E
14	9.9.21	High	H3	6	1	6	1	A	E
16	4.16.21	High	H3	7	1	7	1	B	B
15	4.23.21	High	H3	7	1	7	1	B	C
13	4.25.21	High	H3	7	1	7	1	B	D
14	4.25.21	High	H3	7	1	7	1	B	D
18	4.7.2021	High	H3	7	1	7	1	A	A
15	4.17.21	High	H4	7	0	7	0	A	B
16	4.17.21	High	H4	7	0	7	0	A	B
17	4.17.21	High	H4	7	0	7	0	A	B
18	4.17.21	High	H4	7	0	7	0	A	B
19	4.17.21	High	H4	7	0	7	0	A	B
20	4.17.21	High	H4	7	0	7	0	A	B
20	4.17.21	High	H4	7	0	7	0	B	B
18	4.23.21	High	H4	7	0	7	0	A	C
19	4.23.21	High	H4	7	0	7	0	A	C
20	4.23.21	High	H4	7	0	7	0	A	C
14	4.24.21	High	H4	7	0	7	0	B	C
15	4.24.21	High	H4	7	0	7	0	B	C
16	4.24.21	High	H4	7	0	7	0	B	C
17	4.24.21	High	H4	7	0	7	0	B	C
18	4.24.21	High	H4	7	0	7	0	B	C
19	4.24.21	High	H4	7	0	7	0	B	C
20	4.24.21	High	H4	7	0	7	0	B	C
17	4.25.21	High	H4	7	0	7	0	A	D
18	4.25.21	High	H4	7	0	7	0	A	D
19	4.25.21	High	H4	7	0	7	0	A	D
20	4.25.21	High	H4	7	0	7	0	A	D
15	4.25.21	High	H4	7	0	4	0	B	D
16	4.25.21	High	H4	7	0	7	0	B	D
17	4.25.21	High	H4	7	0	7	0	B	D
18	4.25.21	High	H4	7	0	7	0	B	D
19	4.25.21	High	H4	7	0	7	0	B	D
20	4.25.21	High	H4	7	0	7	0	B	D
20	9.16.21	High	H4	7	0	7	0	A	F
19	9.16.21	High	H4	7	0	7	0	B	F
20	9.16.21	High	H4	7	0	7	0	B	F
17	9.9.21	High	H4	7	0	7	0	A	E
18	9.9.21	High	H4	7	0	7	0	A	E
19	9.9.21	High	H4	7	0	7	0	A	E
20	9.9.21	High	H4	7	0	7	0	A	E
13	9.9.21	High	H4	7	0	7	0	B	E
14	9.9.21	High	H4	7	0	7	0	B	E
15	9.9.21	High	H4	7	0	7	0	B	E
16	9.9.21	High	H4	7	0	7	0	B	E
17	9.9.21	High	H4	7	0	7	0	B	E
18	9.9.21	High	H4	7	0	7	0	B	E
19	9.9.21	High	H4	7	0	7	0	B	E
20	9.9.21	High	H4	7	0	7	0	B	E
1	4.17.21	High	H4	1	1	1	1	A	B
2	4.17.21	High	H4	1	1	1	1	A	B
3	4.17.21	High	H4	1	1	1	1	A	B
4	4.17.21	High	H4	1	1	1	1	A	B
5	4.17.21	High	H4	1	1	1	1	A	B
6	4.17.21	High	H4	1	1	1	1	A	B
7	4.17.21	High	H4	1	1	1	1	A	B
8	4.17.21	High	H4	1	1	1	1	A	B
1	4.17.21	High	H4	1	1	1	1	B	B
2	4.17.21	High	H4	1	1	1	1	B	B
3	4.17.21	High	H4	1	1	1	1	B	B
4	4.17.21	High	H4	1	1	1	1	B	B
5	4.17.21	High	H4	1	1	1	1	B	B
6	4.17.21	High	H4	1	1	1	1	B	B
7	4.17.21	High	H4	1	1	1	1	B	B
8	4.17.21	High	H4	1	1	1	1	B	B
9	4.17.21	High	H4	1	1	1	1	B	B
10	4.17.21	High	H4	1	1	1	1	B	B
11	4.17.21	High	H4	1	1	1	1	B	B
12	4.17.21	High	H4	1	1	1	1	B	B
13	4.17.21	High	H4	1	1	1	1	B	B
1	4.23.21	High	H4	1	1	1	1	A	C
2	4.23.21	High	H4	1	1	1	1	A	C
3	4.23.21	High	H4	1	1	1	1	A	C
4	4.23.21	High	H4	1	1	1	1	A	C
5	4.23.21	High	H4	1	1	1	1	A	C
1	4.24.21	High	H4	1	1	1	1	B	C
2	4.24.21	High	H4	1	1	1	1	B	C
3	4.24.21	High	H4	1	1	1	1	B	C
4	4.24.21	High	H4	1	1	1	1	B	C
5	4.24.21	High	H4	1	1	1	1	B	C
6	4.24.21	High	H4	1	1	1	1	B	C
7	4.24.21	High	H4	1	1	1	1	B	C
1	4.25.21	High	H4	1	1	1	1	B	D
2	4.25.21	High	H4	1	1	1	1	B	D
3	4.25.21	High	H4	1	1	1	1	B	D
4	4.25.21	High	H4	1	1	1	1	B	D
1	9.9.21	High	H4	1	1	1	1	B	E
2	9.9.21	High	H4	1	1	1	1	B	E
14	4.17.21	High	H4	2	1	2	1	B	B
15	4.17.21	High	H4	2	1	2	1	B	B
16	4.17.21	High	H4	2	1	2	1	B	B
17	4.17.21	High	H4	2	1	2	1	B	B
6	4.23.21	High	H4	2	1	2	1	A	C
7	4.23.21	High	H4	2	1	2	1	A	C
8	4.23.21	High	H4	2	1	2	1	A	C
9	4.23.21	High	H4	2	1	2	1	A	C
10	4.23.21	High	H4	2	1	2	1	A	C
11	4.23.21	High	H4	2	1	2	1	A	C
8	4.24.21	High	H4	2	1	2	1	B	C
9	4.24.21	High	H4	2	1	2	1	B	C
10	4.24.21	High	H4	2	1	2	1	B	C
11	4.24.21	High	H4	2	1	2	1	B	C
12	4.24.21	High	H4	2	1	2	1	B	C
1	4.25.21	High	H4	2	1	2	1	A	D
2	4.25.21	High	H4	2	1	2	1	A	D
3	4.25.21	High	H4	2	1	2	1	A	D
4	4.25.21	High	H4	2	1	2	1	A	D
5	4.25.21	High	H4	2	1	2	1	A	D
5	4.25.21	High	H4	2	1	2	1	B	D
6	4.25.21	High	H4	2	1	2	1	B	D
7	4.25.21	High	H4	2	1	2	1	B	D
8	4.25.21	High	H4	2	1	2	1	B	D
9	4.25.21	High	H4	2	1	2	1	B	D
1	9.16.21	High	H4	2	1	2	1	A	F
2	9.16.21	High	H4	2	1	2	1	A	F
3	9.16.21	High	H4	2	1	2	1	A	F
4	9.16.21	High	H4	2	1	2	1	A	F
5	9.16.21	High	H4	2	1	2	1	A	F
6	9.16.21	High	H4	2	1	2	1	A	F
1	9.16.21	High	H4	2	1	2	1	B	F
2	9.16.21	High	H4	2	1	2	1	B	F
3	9.16.21	High	H4	2	1	2	1	B	F
4	9.16.21	High	H4	2	1	2	1	B	F
1	9.9.21	High	H4	2	1	2	1	A	E
2	9.9.21	High	H4	2	1	2	1	A	E
3	9.9.21	High	H4	2	1	2	1	A	E
4	9.9.21	High	H4	2	1	2	1	A	E
5	9.9.21	High	H4	2	1	2	1	A	E
6	9.9.21	High	H4	2	1	2	1	A	E
7	9.9.21	High	H4	2	1	2	1	A	E
3	9.9.21	High	H4	2	1	2	1	B	E
4	9.9.21	High	H4	2	1	2	1	B	E
13	4.24.21	High	H4	3	1	3	1	B	C
6	4.25.21	High	H4	3	1	3	1	A	D
7	4.25.21	High	H4	3	1	3	1	A	D
8	4.25.21	High	H4	3	1	3	1	A	D
9	4.25.21	High	H4	3	1	3	1	A	D
10	4.25.21	High	H4	3	1	3	1	B	D
11	4.25.21	High	H4	3	1	3	1	B	D
12	4.25.21	High	H4	3	1	3	1	B	D
13	4.25.21	High	H4	3	1	3	1	B	D
7	9.16.21	High	H4	3	1	3	1	A	F
8	9.16.21	High	H4	3	1	3	1	A	F
9	9.16.21	High	H4	3	1	3	1	A	F
10	9.16.21	High	H4	3	1	3	1	A	F
11	9.16.21	High	H4	3	1	3	1	A	F
12	9.16.21	High	H4	3	1	3	1	A	F
5	9.16.21	High	H4	3	1	3	1	B	F
6	9.16.21	High	H4	3	1	3	1	B	F
7	9.16.21	High	H4	3	1	3	1	B	F
8	9.16.21	High	H4	3	1	3	1	B	F
9	9.16.21	High	H4	3	1	3	1	B	F
10	9.16.21	High	H4	3	1	3	1	B	F
11	9.16.21	High	H4	3	1	3	1	B	F
8	9.9.21	High	H4	3	1	3	1	A	E
9	9.9.21	High	H4	3	1	3	1	A	E
10	9.9.21	High	H4	3	1	3	1	A	E
11	9.9.21	High	H4	3	1	3	1	A	E
5	9.9.21	High	H4	3	1	3	1	B	E
6	9.9.21	High	H4	3	1	3	1	B	E
7	9.9.21	High	H4	3	1	3	1	B	E
8	9.9.21	High	H4	3	1	3	1	B	E
9	9.9.21	High	H4	3	1	3	1	B	E
12	4.23.21	High	H4	4	1	4	1	A	C
13	4.23.21	High	H4	4	1	4	1	A	C
10	4.25.21	High	H4	4	1	4	1	A	D
11	4.25.21	High	H4	4	1	4	1	A	D
12	4.25.21	High	H4	4	1	4	1	A	D
13	9.16.21	High	H4	4	1	4	1	A	F
14	9.16.21	High	H4	4	1	4	1	A	F
12	9.16.21	High	H4	4	1	4	1	B	F
12	9.9.21	High	H4	4	1	4	1	A	E
13	9.9.21	High	H4	4	1	4	1	A	E
14	9.9.21	High	H4	4	1	4	1	A	E
15	9.9.21	High	H4	4	1	4	1	A	E
10	9.9.21	High	H4	4	1	4	1	B	E
18	4.17.21	High	H4	5	1	5	1	B	B
19	4.17.21	High	H4	5	1	5	1	B	B
13	4.25.21	High	H4	5	1	5	1	A	D
14	4.25.21	High	H4	5	1	5	1	A	D
15	4.25.21	High	H4	5	1	5	1	A	D
15	9.16.21	High	H4	5	1	5	1	A	F
16	9.16.21	High	H4	5	1	5	1	A	F
17	9.16.21	High	H4	5	1	5	1	A	F
18	9.16.21	High	H4	5	1	5	1	A	F
19	9.16.21	High	H4	5	1	5	1	A	F
13	9.16.21	High	H4	5	1	5	1	B	F
14	9.16.21	High	H4	5	1	5	1	B	F
16	9.9.21	High	H4	5	1	5	1	A	E
11	9.9.21	High	H4	5	1	5	1	B	E
14	4.23.21	High	H4	6	1	6	1	A	C
16	4.25.21	High	H4	6	1	6	1	A	D
14	4.25.21	High	H4	6	1	6	1	B	D
15	9.16.21	High	H4	6	1	6	1	B	F
16	9.16.21	High	H4	6	1	6	1	B	F
12	9.9.21	High	H4	6	1	6	1	B	E
15	4.23.21	High	H4	7	1	7	1	A	C
16	4.23.21	High	H4	7	1	7	1	A	C
17	4.23.21	High	H4	7	1	7	1	A	C
17	9.16.21	High	H4	7	1	7	1	B	F
18	9.16.21	High	H4	7	1	7	1	B	F
9	4.17.21	High	H4	2	1	2	1	A	B
10	4.17.21	High	H4	2	1	2	1	A	B
11	4.17.21	High	H4	3	1	3	1	A	B
12	4.17.21	High	H4	3	1	3	1	A	B
13	4.17.21	High	H4	4	1	4	1	A	B
14	4.17.21	High	H4	4	1	4	1	A	B
20	4.17.21	High	H5	7	0	4	0	B	B
17	4.24.21	High	H5	7	0	7	0	A	C
18	4.24.21	High	H5	7	0	7	0	A	C
19	4.24.21	High	H5	7	0	7	0	A	C
20	4.24.21	High	H5	7	0	7	0	A	C
19	4.24.21	High	H5	7	0	7	0	B	C
20	4.24.21	High	H5	7	0	7	0	B	C
12	4.25.21	High	H5	7	0	7	0	A	D
13	4.25.21	High	H5	7	0	7	0	A	D
14	4.25.21	High	H5	7	0	7	0	A	D
15	4.25.21	High	H5	7	0	7	0	A	D
16	4.25.21	High	H5	7	0	7	0	A	D
17	4.25.21	High	H5	7	0	7	0	A	D
18	4.25.21	High	H5	7	0	7	0	A	D
19	4.25.21	High	H5	7	0	7	0	A	D
20	4.25.21	High	H5	7	0	7	0	A	D
15	4.25.21	High	H5	7	0	7	0	B	D
16	4.25.21	High	H5	7	0	7	0	B	D
17	4.25.21	High	H5	7	0	7	0	B	D
18	4.25.21	High	H5	7	0	7	0	B	D
19	4.25.21	High	H5	7	0	7	0	B	D
20	4.25.21	High	H5	7	0	7	0	B	D
18	9.10.21	High	H5	7	0	7	0	A	E
19	9.10.21	High	H5	7	0	7	0	A	E
20	9.10.21	High	H5	7	0	7	0	A	E
17	9.10.21	High	H5	7	0	7	0	B	E
18	9.10.21	High	H5	7	0	7	0	B	E
19	9.10.21	High	H5	7	0	7	0	B	E
20	9.10.21	High	H5	7	0	7	0	B	E
14	9.16.21	High	H5	7	0	7	0	A	F
15	9.16.21	High	H5	7	0	7	0	A	F
16	9.16.21	High	H5	7	0	7	0	A	F
17	9.16.21	High	H5	7	0	7	0	A	F
18	9.16.21	High	H5	7	0	7	0	A	F
19	9.16.21	High	H5	7	0	7	0	A	F
20	9.16.21	High	H5	7	0	7	0	A	F
16	9.16.21	High	H5	7	0	7	0	B	F
17	9.16.21	High	H5	7	0	7	0	B	F
18	9.16.21	High	H5	7	0	7	0	B	F
19	9.16.21	High	H5	7	0	7	0	B	F
20	9.16.21	High	H5	7	0	7	0	B	F
1	4.17.21	High	H5	1	1	1	1	A	B
2	4.17.21	High	H5	1	1	1	1	A	B
3	4.17.21	High	H5	1	1	1	1	A	B
4	4.17.21	High	H5	1	1	1	1	A	B
5	4.17.21	High	H5	1	1	1	1	A	B
6	4.17.21	High	H5	1	1	1	1	A	B
7	4.17.21	High	H5	1	1	1	1	A	B
8	4.17.21	High	H5	1	1	1	1	A	B
9	4.17.21	High	H5	1	1	1	1	A	B
10	4.17.21	High	H5	1	1	1	1	A	B
11	4.17.21	High	H5	1	1	1	1	A	B
12	4.17.21	High	H5	1	1	1	1	A	B
13	4.17.21	High	H5	1	1	1	1	A	B
14	4.17.21	High	H5	1	1	1	1	A	B
15	4.17.21	High	H5	1	1	1	1	A	B
16	4.17.21	High	H5	1	1	1	1	A	B
17	4.17.21	High	H5	1	1	1	1	A	B
18	4.17.21	High	H5	1	1	1	1	A	B
19	4.17.21	High	H5	1	1	1	1	A	B
20	4.17.21	High	H5	1	1	1	1	A	B
1	4.17.21	High	H5	1	1	1	1	B	B
2	4.17.21	High	H5	1	1	1	1	B	B
3	4.17.21	High	H5	1	1	1	1	B	B
4	4.17.21	High	H5	1	1	1	1	B	B
5	4.17.21	High	H5	1	1	1	1	B	B
6	4.17.21	High	H5	1	1	1	1	B	B
7	4.17.21	High	H5	1	1	1	1	B	B
8	4.17.21	High	H5	1	1	1	1	B	B
9	4.17.21	High	H5	1	1	1	1	B	B
10	4.17.21	High	H5	1	1	1	1	B	B
11	4.17.21	High	H5	1	1	1	1	B	B
12	4.17.21	High	H5	1	1	1	1	B	B
13	4.17.21	High	H5	1	1	1	1	B	B
14	4.17.21	High	H5	1	1	1	1	B	B
15	4.17.21	High	H5	1	1	1	1	B	B
1	4.24.21	High	H5	1	1	1	1	A	C
2	4.24.21	High	H5	1	1	1	1	A	C
3	4.24.21	High	H5	1	1	1	1	A	C
4	4.24.21	High	H5	1	1	1	1	A	C
5	4.24.21	High	H5	1	1	1	1	A	C
1	4.24.21	High	H5	1	1	1	1	B	C
1	4.25.21	High	H5	1	1	1	1	A	D
1	4.25.21	High	H5	1	1	1	1	B	D
1	9.10.21	High	H5	1	1	1	1	A	E
2	9.10.21	High	H5	1	1	1	1	A	E
3	9.10.21	High	H5	1	1	1	1	A	E
4	9.10.21	High	H5	1	1	1	1	A	E
5	9.10.21	High	H5	1	1	1	1	A	E
6	9.10.21	High	H5	1	1	1	1	A	E
1	9.10.21	High	H5	1	1	1	1	B	E
2	9.10.21	High	H5	1	1	1	1	B	E
1	9.16.21	High	H5	1	1	1	1	B	F
16	4.17.21	High	H5	2	1	2	1	B	B
17	4.17.21	High	H5	2	1	2	1	B	B
18	4.17.21	High	H5	2	1	2	1	B	B
19	4.17.21	High	H5	2	1	2	1	B	B
6	4.24.21	High	H5	2	1	2	1	A	C
7	4.24.21	High	H5	2	1	2	1	A	C
8	4.24.21	High	H5	2	1	2	1	A	C
2	4.24.21	High	H5	2	1	2	1	B	C
3	4.24.21	High	H5	2	1	2	1	B	C
4	4.24.21	High	H5	2	1	2	1	B	C
5	4.24.21	High	H5	2	1	2	1	B	C
6	4.24.21	High	H5	2	1	2	1	B	C
7	4.24.21	High	H5	2	1	2	1	B	C
8	4.24.21	High	H5	2	1	2	1	B	C
9	4.24.21	High	H5	2	1	2	1	B	C
10	4.24.21	High	H5	2	1	2	1	B	C
11	4.24.21	High	H5	2	1	2	1	B	C
2	4.25.21	High	H5	2	1	2	1	A	D
3	4.25.21	High	H5	2	1	2	1	A	D
4	4.25.21	High	H5	2	1	2	1	A	D
5	4.25.21	High	H5	2	1	2	1	A	D
2	4.25.21	High	H5	2	1	2	1	B	D
3	4.25.21	High	H5	2	1	2	1	B	D
4	4.25.21	High	H5	2	1	2	1	B	D
5	4.25.21	High	H5	2	1	2	1	B	D
6	4.25.21	High	H5	2	1	2	1	B	D
7	9.10.21	High	H5	2	1	2	1	A	E
8	9.10.21	High	H5	2	1	2	1	A	E
3	9.10.21	High	H5	2	1	2	1	B	E
4	9.10.21	High	H5	2	1	2	1	B	E
5	9.10.21	High	H5	2	1	2	1	B	E
6	9.10.21	High	H5	2	1	2	1	B	E
7	9.10.21	High	H5	2	1	2	1	B	E
8	9.10.21	High	H5	2	1	2	1	B	E
1	9.16.21	High	H5	2	1	2	1	A	F
2	9.16.21	High	H5	2	1	2	1	A	F
2	9.16.21	High	H5	2	1	2	1	B	F
3	9.16.21	High	H5	2	1	2	1	B	F
4	9.16.21	High	H5	2	1	2	1	B	F
5	9.16.21	High	H5	2	1	2	1	B	F
9	4.24.21	High	H5	3	1	3	1	A	C
10	4.24.21	High	H5	3	1	3	1	A	C
12	4.24.21	High	H5	3	1	3	1	B	C
13	4.24.21	High	H5	3	1	3	1	B	C
6	4.25.21	High	H5	3	1	3	1	A	D
7	4.25.21	High	H5	3	1	3	1	B	D
8	4.25.21	High	H5	3	1	3	1	B	D
9	4.25.21	High	H5	3	1	3	1	B	D
10	4.25.21	High	H5	3	1	3	1	B	D
9	9.10.21	High	H5	3	1	3	1	A	E
10	9.10.21	High	H5	3	1	3	1	A	E
9	9.10.21	High	H5	3	1	3	1	B	E
10	9.10.21	High	H5	3	1	3	1	B	E
11	9.10.21	High	H5	3	1	3	1	B	E
3	9.16.21	High	H5	3	1	3	1	A	F
4	9.16.21	High	H5	3	1	3	1	A	F
5	9.16.21	High	H5	3	1	3	1	A	F
6	9.16.21	High	H5	3	1	3	1	A	F
7	9.16.21	High	H5	3	1	3	1	A	F
6	9.16.21	High	H5	3	1	3	1	B	F
7	9.16.21	High	H5	3	1	3	1	B	F
11	4.24.21	High	H5	4	1	4	1	A	C
11	9.10.21	High	H5	4	1	4	1	A	E
12	9.10.21	High	H5	4	1	4	1	B	E
8	9.16.21	High	H5	4	1	4	1	A	F
8	9.16.21	High	H5	4	1	4	1	B	F
9	9.16.21	High	H5	4	1	4	1	B	F
10	9.16.21	High	H5	4	1	4	1	B	F
11	9.16.21	High	H5	4	1	4	1	B	F
12	4.24.21	High	H5	5	1	5	1	A	C
13	4.24.21	High	H5	5	1	5	1	A	C
14	4.24.21	High	H5	5	1	5	1	B	C
15	4.24.21	High	H5	5	1	5	1	B	C
16	4.24.21	High	H5	5	1	5	1	B	C
7	4.25.21	High	H5	5	1	5	1	A	D
8	4.25.21	High	H5	5	1	5	1	A	D
9	4.25.21	High	H5	5	1	5	1	A	D
10	4.25.21	High	H5	5	1	5	1	A	D
11	4.25.21	High	H5	5	1	5	1	B	D
12	9.10.21	High	H5	5	1	5	1	A	E
13	9.10.21	High	H5	5	1	5	1	A	E
14	9.10.21	High	H5	5	1	5	1	A	E
13	9.10.21	High	H5	5	1	5	1	B	E
14	9.10.21	High	H5	5	1	5	1	B	E
9	9.16.21	High	H5	5	1	5	1	A	F
10	9.16.21	High	H5	5	1	5	1	A	F
12	9.16.21	High	H5	5	1	5	1	B	F
13	9.16.21	High	H5	5	1	5	1	B	F
14	9.16.21	High	H5	5	1	5	1	B	F
14	4.24.21	High	H5	6	1	6	1	A	C
17	4.24.21	High	H5	6	1	6	1	B	C
11	4.25.21	High	H5	6	1	6	1	A	D
12	4.25.21	High	H5	6	1	6	1	B	D
13	4.25.21	High	H5	6	1	6	1	B	D
14	4.25.21	High	H5	6	1	6	1	B	D
15	9.10.21	High	H5	6	1	6	1	A	E
16	9.10.21	High	H5	6	1	6	1	A	E
17	9.10.21	High	H5	6	1	6	1	A	E
15	9.10.21	High	H5	6	1	6	1	B	E
16	9.10.21	High	H5	6	1	6	1	B	E
11	9.16.21	High	H5	6	1	6	1	A	F
15	9.16.21	High	H5	6	1	6	1	B	F
15	4.24.21	High	H5	7	1	7	1	A	C
16	4.24.21	High	H5	7	1	7	1	A	C
18	4.24.21	High	H5	7	1	7	1	B	C
12	9.16.21	High	H5	7	1	7	1	A	F
13	9.16.21	High	H5	7	1	7	1	A	F
18	4.25.21	High	H6	5	0	5	0	B	D
20	4.17.21	High	H6	7	0	7	0	A	B
20	4.17.21	High	H6	7	0	7	0	B	B
15	4.24.21	High	H6	7	0	7	0	A	C
16	4.24.21	High	H6	7	0	7	0	A	C
17	4.24.21	High	H6	7	0	7	0	A	C
18	4.24.21	High	H6	7	0	7	0	A	C
19	4.24.21	High	H6	7	0	7	0	A	C
20	4.24.21	High	H6	7	0	7	0	A	C
15	4.24.21	High	H6	7	0	7	0	B	C
16	4.24.21	High	H6	7	0	7	0	B	C
17	4.24.21	High	H6	7	0	7	0	B	C
18	4.24.21	High	H6	7	0	7	0	B	C
19	4.24.21	High	H6	7	0	7	0	B	C
20	4.24.21	High	H6	7	0	7	0	B	C
19	4.25.21	High	H6	7	0	7	0	B	D
20	4.25.21	High	H6	7	0	7	0	B	D
15	9.10.21	High	H6	7	0	7	0	A	E
16	9.10.21	High	H6	7	0	7	0	A	E
17	9.10.21	High	H6	7	0	7	0	A	E
18	9.10.21	High	H6	7	0	7	0	A	E
19	9.10.21	High	H6	7	0	7	0	A	E
20	9.10.21	High	H6	7	0	7	0	A	E
16	9.10.21	High	H6	7	0	7	0	B	E
17	9.10.21	High	H6	7	0	7	0	B	E
18	9.10.21	High	H6	7	0	7	0	B	E
19	9.10.21	High	H6	7	0	7	0	B	E
20	9.10.21	High	H6	7	0	7	0	B	E
15	9.16.21	High	H6	7	0	7	0	A	F
16	9.16.21	High	H6	7	0	7	0	A	F
17	9.16.21	High	H6	7	0	7	0	A	F
18	9.16.21	High	H6	7	0	7	0	A	F
19	9.16.21	High	H6	7	0	7	0	A	F
20	9.16.21	High	H6	7	0	7	0	A	F
12	9.16.21	High	H6	7	0	7	0	B	F
13	9.16.21	High	H6	7	0	7	0	B	F
14	9.16.21	High	H6	7	0	7	0	B	F
15	9.16.21	High	H6	7	0	7	0	B	F
16	9.16.21	High	H6	7	0	7	0	B	F
17	9.16.21	High	H6	7	0	7	0	B	F
18	9.16.21	High	H6	7	0	7	0	B	F
19	9.16.21	High	H6	7	0	7	0	B	F
20	9.16.21	High	H6	7	0	7	0	B	F
1	4.17.21	High	H6	1	1	1	1	A	B
2	4.17.21	High	H6	1	1	1	1	A	B
3	4.17.21	High	H6	1	1	1	1	A	B
4	4.17.21	High	H6	1	1	1	1	A	B
5	4.17.21	High	H6	1	1	1	1	A	B
6	4.17.21	High	H6	1	1	1	1	A	B
7	4.17.21	High	H6	1	1	1	1	A	B
8	4.17.21	High	H6	1	1	1	1	A	B
9	4.17.21	High	H6	1	1	1	1	A	B
10	4.17.21	High	H6	1	1	1	1	A	B
11	4.17.21	High	H6	1	1	1	1	A	B
12	4.17.21	High	H6	1	1	1	1	A	B
13	4.17.21	High	H6	1	1	1	1	A	B
14	4.17.21	High	H6	1	1	1	1	A	B
15	4.17.21	High	H6	1	1	1	1	A	B
16	4.17.21	High	H6	1	1	1	1	A	B
17	4.17.21	High	H6	1	1	1	1	A	B
1	4.17.21	High	H6	1	1	1	1	B	B
2	4.17.21	High	H6	1	1	1	1	B	B
3	4.17.21	High	H6	1	1	1	1	B	B
4	4.17.21	High	H6	1	1	1	1	B	B
5	4.17.21	High	H6	1	1	1	1	B	B
6	4.17.21	High	H6	1	1	1	1	B	B
7	4.17.21	High	H6	1	1	1	1	B	B
8	4.17.21	High	H6	1	1	1	1	B	B
9	4.17.21	High	H6	1	1	1	1	B	B
10	4.17.21	High	H6	1	1	1	1	B	B
11	4.17.21	High	H6	1	1	1	1	B	B
12	4.17.21	High	H6	1	1	1	1	B	B
13	4.17.21	High	H6	1	1	1	1	B	B
14	4.17.21	High	H6	1	1	1	1	B	B
15	4.17.21	High	H6	1	1	1	1	B	B
16	4.17.21	High	H6	1	1	1	1	B	B
17	4.17.21	High	H6	1	1	1	1	B	B
18	4.17.21	High	H6	1	1	1	1	B	B
19	4.17.21	High	H6	1	1	1	1	B	B
1	4.24.21	High	H6	1	1	1	1	A	C
1	4.24.21	High	H6	1	1	1	1	B	C
2	4.24.21	High	H6	1	1	1	1	B	C
3	4.24.21	High	H6	1	1	1	1	B	C
1	4.25.21	High	H6	1	1	1	1	B	D
2	4.25.21	High	H6	1	1	1	1	B	D
1	9.10.21	High	H6	1	1	1	1	A	E
2	9.10.21	High	H6	1	1	1	1	A	E
3	9.10.21	High	H6	1	1	1	1	A	E
1	9.10.21	High	H6	1	1	1	1	B	E
2	9.10.21	High	H6	1	1	1	1	B	E
3	9.10.21	High	H6	1	1	1	1	B	E
4	9.10.21	High	H6	1	1	1	1	B	E
1	9.16.21	High	H6	1	1	1	1	A	F
1	9.16.21	High	H6	1	1	1	1	B	F
18	4.17.21	High	H6	2	1	2	1	A	B
2	4.24.21	High	H6	2	1	2	1	A	C
4	4.24.21	High	H6	2	1	2	1	B	C
5	4.24.21	High	H6	2	1	2	1	B	C
1	4.25.21	High	H6	2	1	2	1	A	D
2	4.25.21	High	H6	2	1	2	1	A	D
3	4.25.21	High	H6	2	1	2	1	A	D
4	4.25.21	High	H6	2	1	2	1	A	D
5	4.25.21	High	H6	2	1	2	1	A	D
3	4.25.21	High	H6	2	1	2	1	B	D
4	4.25.21	High	H6	2	1	2	1	B	D
5	4.25.21	High	H6	2	1	2	1	B	D
6	4.25.21	High	H6	2	1	2	1	B	D
7	4.25.21	High	H6	2	1	2	1	B	D
8	4.25.21	High	H6	2	1	2	1	B	D
9	4.25.21	High	H6	2	1	2	1	B	D
10	4.25.21	High	H6	2	1	2	1	B	D
11	4.25.21	High	H6	2	1	2	1	B	D
4	9.10.21	High	H6	2	1	2	1	A	E
5	9.10.21	High	H6	2	1	2	1	B	E
6	9.10.21	High	H6	2	1	2	1	B	E
7	9.10.21	High	H6	2	1	2	1	B	E
2	9.16.21	High	H6	2	1	2	1	A	F
3	9.16.21	High	H6	2	1	2	1	A	F
4	9.16.21	High	H6	2	1	2	1	A	F
5	9.16.21	High	H6	2	1	2	1	A	F
2	9.16.21	High	H6	2	1	2	1	B	F
3	9.16.21	High	H6	2	1	2	1	B	F
4	9.16.21	High	H6	2	1	2	1	B	F
3	4.24.21	High	H6	3	1	3	1	A	C
4	4.24.21	High	H6	3	1	3	1	A	C
5	4.24.21	High	H6	3	1	3	1	A	C
6	4.24.21	High	H6	3	1	3	1	B	C
6	4.25.21	High	H6	3	1	3	1	A	D
7	4.25.21	High	H6	3	1	3	1	A	D
12	4.25.21	High	H6	3	1	3	1	B	D
13	4.25.21	High	H6	3	1	3	1	B	D
14	4.25.21	High	H6	3	1	3	1	B	D
5	9.10.21	High	H6	3	1	3	1	A	E
6	9.10.21	High	H6	3	1	3	1	A	E
7	9.10.21	High	H6	3	1	3	1	A	E
8	9.10.21	High	H6	3	1	3	1	B	E
9	9.10.21	High	H6	3	1	3	1	B	E
10	9.10.21	High	H6	3	1	3	1	B	E
6	9.16.21	High	H6	3	1	3	1	A	F
7	9.16.21	High	H6	3	1	3	1	A	F
5	9.16.21	High	H6	3	1	3	1	B	F
6	9.16.21	High	H6	3	1	3	1	B	F
7	9.16.21	High	H6	3	1	3	1	B	F
6	4.24.21	High	H6	4	1	4	1	A	C
7	4.24.21	High	H6	4	1	4	1	A	C
7	4.24.21	High	H6	4	1	4	1	B	C
8	4.24.21	High	H6	4	1	4	1	B	C
8	4.25.21	High	H6	4	1	4	1	A	D
9	4.25.21	High	H6	4	1	4	1	A	D
10	4.25.21	High	H6	4	1	4	1	A	D
11	4.25.21	High	H6	4	1	4	1	A	D
12	4.25.21	High	H6	4	1	4	1	A	D
13	4.25.21	High	H6	4	1	4	1	A	D
14	4.25.21	High	H6	4	1	4	1	A	D
15	4.25.21	High	H6	4	1	4	1	A	D
16	4.25.21	High	H6	4	1	4	1	A	D
17	4.25.21	High	H6	4	1	4	1	A	D
8	9.10.21	High	H6	4	1	4	1	A	E
11	9.10.21	High	H6	4	1	4	1	B	E
12	9.10.21	High	H6	4	1	4	1	B	E
8	9.16.21	High	H6	4	1	4	1	A	F
9	9.16.21	High	H6	4	1	4	1	A	F
8	9.16.21	High	H6	4	1	4	1	B	F
8	4.24.21	High	H6	5	1	5	1	A	C
9	4.24.21	High	H6	5	1	5	1	A	C
10	4.24.21	High	H6	5	1	5	1	A	C
9	9.10.21	High	H6	5	1	5	1	A	E
10	9.10.21	High	H6	5	1	5	1	A	E
11	9.10.21	High	H6	5	1	5	1	A	E
12	9.10.21	High	H6	5	1	5	1	A	E
13	9.10.21	High	H6	5	1	5	1	B	E
14	9.10.21	High	H6	5	1	5	1	B	E
10	9.16.21	High	H6	5	1	5	1	A	F
9	9.16.21	High	H6	5	1	5	1	B	F
10	9.16.21	High	H6	5	1	5	1	B	F
11	9.16.21	High	H6	5	1	5	1	B	F
19	4.17.21	High	H6	6	1	6	1	A	B
9	4.24.21	High	H6	6	1	6	1	B	C
10	4.24.21	High	H6	6	1	6	1	B	C
11	4.24.21	High	H6	6	1	6	1	B	C
18	4.25.21	High	H6	6	1	6	1	A	D
15	4.25.21	High	H6	6	1	6	1	B	D
16	4.25.21	High	H6	6	1	6	1	B	D
17	4.25.21	High	H6	6	1	6	1	B	D
13	9.10.21	High	H6	6	1	6	1	A	E
15	9.10.21	High	H6	6	1	6	1	B	E
11	4.24.21	High	H6	7	1	7	1	A	C
12	4.24.21	High	H6	7	1	7	1	A	C
13	4.24.21	High	H6	7	1	7	1	A	C
14	4.24.21	High	H6	7	1	7	1	A	C
12	4.24.21	High	H6	7	1	7	1	B	C
13	4.24.21	High	H6	7	1	7	1	B	C
14	4.24.21	High	H6	7	1	7	1	B	C
19	4.25.21	High	H6	7	1	7	1	A	D
20	4.25.21	High	H6	7	1	7	1	A	D
14	9.10.21	High	H6	7	1	7	1	A	E
11	9.16.21	High	H6	7	1	7	1	A	F
12	9.16.21	High	H6	7	1	7	1	A	F
13	9.16.21	High	H6	7	1	7	1	A	F
14	9.16.21	High	H6	7	1	7	1	A	F
15	4.16.21	Low	L1	7	0	7	0	B	B
16	4.16.21	Low	L1	7	0	7	0	B	B
17	4.16.21	Low	L1	7	0	7	0	B	B
18	4.16.21	Low	L1	7	0	7	0	B	B
19	4.16.21	Low	L1	7	0	7	0	B	B
20	4.16.21	Low	L1	7	0	7	0	B	B
19	4.23.21	Low	L1	7	0	7	0	A	C
20	4.23.21	Low	L1	7	0	7	0	A	C
19	4.23.21	Low	L1	7	0	7	0	B	C
20	4.23.21	Low	L1	7	0	7	0	B	C
9	4.25.21	Low	L1	7	0	5	0	A	D
10	4.25.21	Low	L1	7	0	6	0	A	D
11	4.25.21	Low	L1	7	0	6	0	A	D
12	4.25.21	Low	L1	7	0	7	0	A	D
13	4.25.21	Low	L1	7	0	7	0	A	D
14	4.25.21	Low	L1	7	0	7	0	A	D
15	4.25.21	Low	L1	7	0	7	0	A	D
16	4.25.21	Low	L1	7	0	7	0	A	D
17	4.25.21	Low	L1	7	0	7	0	A	D
18	4.25.21	Low	L1	7	0	7	0	A	D
19	4.25.21	Low	L1	7	0	7	0	A	D
20	4.25.21	Low	L1	7	0	7	0	A	D
11	4.25.21	Low	L1	7	0	6	0	B	D
12	4.25.21	Low	L1	7	0	7	0	B	D
13	4.25.21	Low	L1	7	0	7	0	B	D
14	4.25.21	Low	L1	7	0	7	0	B	D
15	4.25.21	Low	L1	7	0	7	0	B	D
16	4.25.21	Low	L1	7	0	7	0	B	D
17	4.25.21	Low	L1	7	0	7	0	B	D
18	4.25.21	Low	L1	7	0	7	0	B	D
19	4.25.21	Low	L1	7	0	7	0	B	D
20	4.25.21	Low	L1	7	0	7	0	B	D
12	4.7.2021	Low	L1	7	0	6	0	A	A
13	4.7.2021	Low	L1	7	0	7	0	A	A
14	4.7.2021	Low	L1	7	0	7	0	A	A
15	4.7.2021	Low	L1	7	0	7	0	A	A
16	4.7.2021	Low	L1	7	0	7	0	A	A
17	4.7.2021	Low	L1	7	0	7	0	A	A
18	4.7.2021	Low	L1	7	0	7	0	A	A
19	4.7.2021	Low	L1	7	0	7	0	A	A
20	4.7.2021	Low	L1	7	0	7	0	A	A
17	9.16.21	Low	L1	7	0	7	0	A	F
18	9.16.21	Low	L1	7	0	7	0	A	F
19	9.16.21	Low	L1	7	0	7	0	A	F
20	9.16.21	Low	L1	7	0	7	0	A	F
15	9.16.21	Low	L1	7	0	7	0	B	F
16	9.16.21	Low	L1	7	0	7	0	B	F
17	9.16.21	Low	L1	7	0	7	0	B	F
18	9.16.21	Low	L1	7	0	7	0	B	F
19	9.16.21	Low	L1	7	0	7	0	B	F
20	9.16.21	Low	L1	7	0	7	0	B	F
10	9.9.21	Low	L1	7	0	5	0	A	E
11	9.9.21	Low	L1	7	0	5	0	A	E
12	9.9.21	Low	L1	7	0	6	0	A	E
13	9.9.21	Low	L1	7	0	6	0	A	E
14	9.9.21	Low	L1	7	0	7	0	A	E
15	9.9.21	Low	L1	7	0	7	0	A	E
16	9.9.21	Low	L1	7	0	7	0	A	E
17	9.9.21	Low	L1	7	0	7	0	A	E
18	9.9.21	Low	L1	7	0	7	0	A	E
19	9.9.21	Low	L1	7	0	7	0	A	E
20	9.9.21	Low	L1	7	0	7	0	A	E
16	9.9.21	Low	L1	7	0	7	0	B	E
17	9.9.21	Low	L1	7	0	7	0	B	E
18	9.9.21	Low	L1	7	0	7	0	B	E
19	9.9.21	Low	L1	7	0	7	0	B	E
20	9.9.21	Low	L1	7	0	7	0	B	E
1	4.16.21	Low	L1	1	1	1	1	A	B
1	4.16.21	Low	L1	1	1	1	1	B	B
1	4.23.21	Low	L1	1	1	1	1	A	C
2	4.23.21	Low	L1	1	1	1	1	A	C
3	4.23.21	Low	L1	1	1	1	1	A	C
4	4.23.21	Low	L1	1	1	1	1	A	C
5	4.23.21	Low	L1	1	1	1	1	A	C
6	4.23.21	Low	L1	1	1	1	1	A	C
7	4.23.21	Low	L1	1	1	1	1	A	C
8	4.23.21	Low	L1	1	1	1	1	A	C
9	4.23.21	Low	L1	1	1	1	1	A	C
10	4.23.21	Low	L1	1	1	1	1	A	C
11	4.23.21	Low	L1	1	1	1	1	A	C
12	4.23.21	Low	L1	1	1	1	1	A	C
13	4.23.21	Low	L1	1	1	1	1	A	C
14	4.23.21	Low	L1	1	1	1	1	A	C
15	4.23.21	Low	L1	1	1	1	1	A	C
16	4.23.21	Low	L1	1	1	1	1	A	C
1	4.23.21	Low	L1	1	1	1	1	B	C
2	4.23.21	Low	L1	1	1	1	1	B	C
3	4.23.21	Low	L1	1	1	1	1	B	C
4	4.23.21	Low	L1	1	1	1	1	B	C
5	4.23.21	Low	L1	1	1	1	1	B	C
6	4.23.21	Low	L1	1	1	1	1	B	C
7	4.23.21	Low	L1	1	1	1	1	B	C
8	4.23.21	Low	L1	1	1	1	1	B	C
9	4.23.21	Low	L1	1	1	1	1	B	C
10	4.23.21	Low	L1	1	1	1	1	B	C
11	4.23.21	Low	L1	1	1	1	1	B	C
12	4.23.21	Low	L1	1	1	1	1	B	C
13	4.23.21	Low	L1	1	1	1	1	B	C
14	4.23.21	Low	L1	1	1	1	1	B	C
15	4.23.21	Low	L1	1	1	1	1	B	C
1	4.25.21	Low	L1	1	1	1	1	B	D
2	4.25.21	Low	L1	1	1	1	1	B	D
3	4.25.21	Low	L1	1	1	1	1	B	D
4	4.25.21	Low	L1	1	1	1	1	B	D
1	4.7.2021	Low	L1	1	1	1	1	A	A
1	9.16.21	Low	L1	1	1	1	1	A	F
2	9.16.21	Low	L1	1	1	1	1	A	F
1	9.16.21	Low	L1	1	1	1	1	B	F
1	9.9.21	Low	L1	1	1	1	1	A	E
2	4.16.21	Low	L1	2	1	2	1	A	B
3	4.16.21	Low	L1	2	1	2	1	A	B
4	4.16.21	Low	L1	2	1	2	1	A	B
5	4.16.21	Low	L1	2	1	2	1	A	B
6	4.16.21	Low	L1	2	1	2	1	A	B
7	4.16.21	Low	L1	2	1	2	1	A	B
8	4.16.21	Low	L1	2	1	2	1	A	B
9	4.16.21	Low	L1	2	1	2	1	A	B
10	4.16.21	Low	L1	2	1	2	1	A	B
11	4.16.21	Low	L1	2	1	2	1	A	B
12	4.16.21	Low	L1	2	1	2	1	A	B
13	4.16.21	Low	L1	2	1	2	1	A	B
14	4.16.21	Low	L1	2	1	2	1	A	B
15	4.16.21	Low	L1	2	1	2	1	A	B
2	4.16.21	Low	L1	2	1	2	1	B	B
3	4.16.21	Low	L1	2	1	2	1	B	B
4	4.16.21	Low	L1	2	1	2	1	B	B
5	4.16.21	Low	L1	2	1	2	1	B	B
6	4.16.21	Low	L1	2	1	2	1	B	B
7	4.16.21	Low	L1	2	1	2	1	B	B
17	4.23.21	Low	L1	2	1	2	1	A	C
18	4.23.21	Low	L1	2	1	2	1	A	C
16	4.23.21	Low	L1	2	1	2	1	B	C
17	4.23.21	Low	L1	2	1	2	1	B	C
18	4.23.21	Low	L1	2	1	2	1	B	C
1	4.25.21	Low	L1	2	1	2	1	A	D
2	4.25.21	Low	L1	2	1	2	1	A	D
5	4.25.21	Low	L1	2	1	2	1	B	D
6	4.25.21	Low	L1	2	1	2	1	B	D
2	4.7.2021	Low	L1	2	1	2	1	A	A
3	4.7.2021	Low	L1	2	1	2	1	A	A
3	9.16.21	Low	L1	2	1	2	1	A	F
4	9.16.21	Low	L1	2	1	2	1	A	F
5	9.16.21	Low	L1	2	1	2	1	A	F
6	9.16.21	Low	L1	2	1	2	1	A	F
2	9.16.21	Low	L1	2	1	2	1	B	F
3	9.16.21	Low	L1	2	1	2	1	B	F
4	9.16.21	Low	L1	2	1	2	1	B	F
5	9.16.21	Low	L1	2	1	2	1	B	F
2	9.9.21	Low	L1	2	1	2	1	A	E
3	9.9.21	Low	L1	2	1	2	1	A	E
1	9.9.21	Low	L1	2	1	2	1	B	E
2	9.9.21	Low	L1	2	1	2	1	B	E
3	9.9.21	Low	L1	2	1	2	1	B	E
4	9.9.21	Low	L1	2	1	2	1	B	E
5	9.9.21	Low	L1	2	1	2	1	B	E
6	9.9.21	Low	L1	2	1	2	1	B	E
16	4.16.21	Low	L1	3	1	3	1	A	B
17	4.16.21	Low	L1	3	1	3	1	A	B
8	4.16.21	Low	L1	3	1	3	1	B	B
9	4.16.21	Low	L1	3	1	3	1	B	B
10	4.16.21	Low	L1	3	1	3	1	B	B
11	4.16.21	Low	L1	3	1	3	1	B	B
3	4.25.21	Low	L1	3	1	3	1	A	D
4	4.25.21	Low	L1	3	1	3	1	A	D
7	4.25.21	Low	L1	3	1	3	1	B	D
8	4.25.21	Low	L1	3	1	3	1	B	D
4	4.7.2021	Low	L1	3	1	3	1	A	A
5	4.7.2021	Low	L1	3	1	3	1	A	A
6	4.7.2021	Low	L1	3	1	3	1	A	A
7	9.16.21	Low	L1	3	1	3	1	A	F
8	9.16.21	Low	L1	3	1	3	1	A	F
9	9.16.21	Low	L1	3	1	3	1	A	F
10	9.16.21	Low	L1	3	1	3	1	A	F
11	9.16.21	Low	L1	3	1	3	1	A	F
6	9.16.21	Low	L1	3	1	3	1	B	F
7	9.16.21	Low	L1	3	1	3	1	B	F
4	9.9.21	Low	L1	3	1	3	1	A	E
5	9.9.21	Low	L1	3	1	3	1	A	E
6	9.9.21	Low	L1	3	1	3	1	A	E
7	9.9.21	Low	L1	3	1	3	1	B	E
8	9.9.21	Low	L1	3	1	3	1	B	E
12	4.16.21	Low	L1	4	1	4	1	B	B
9	4.25.21	Low	L1	4	1	4	1	B	D
7	4.7.2021	Low	L1	4	1	4	1	A	A
8	4.7.2021	Low	L1	4	1	4	1	A	A
12	9.16.21	Low	L1	4	1	4	1	A	F
13	9.16.21	Low	L1	4	1	4	1	A	F
8	9.16.21	Low	L1	4	1	4	1	B	F
9	9.16.21	Low	L1	4	1	4	1	B	F
7	9.9.21	Low	L1	4	1	4	1	A	E
9	9.9.21	Low	L1	4	1	4	1	B	E
10	9.9.21	Low	L1	4	1	4	1	B	E
11	9.9.21	Low	L1	4	1	4	1	B	E
12	9.9.21	Low	L1	4	1	4	1	B	E
18	4.16.21	Low	L1	5	1	5	1	A	B
13	4.16.21	Low	L1	5	1	5	1	B	B
14	4.16.21	Low	L1	5	1	5	1	B	B
5	4.25.21	Low	L1	5	1	5	1	A	D
6	4.25.21	Low	L1	5	1	5	1	A	D
10	4.25.21	Low	L1	5	1	5	1	B	D
10	9.16.21	Low	L1	5	1	5	1	B	F
11	9.16.21	Low	L1	5	1	5	1	B	F
12	9.16.21	Low	L1	5	1	5	1	B	F
13	9.9.21	Low	L1	5	1	5	1	B	E
14	9.9.21	Low	L1	5	1	5	1	B	E
7	4.25.21	Low	L1	6	1	6	1	A	D
9	4.7.2021	Low	L1	6	1	6	1	A	A
14	9.16.21	Low	L1	6	1	6	1	A	F
13	9.16.21	Low	L1	6	1	6	1	B	F
14	9.16.21	Low	L1	6	1	6	1	B	F
8	9.9.21	Low	L1	6	1	6	1	A	E
9	9.9.21	Low	L1	6	1	6	1	A	E
15	9.9.21	Low	L1	6	1	6	1	B	E
19	4.16.21	Low	L1	7	1	7	1	A	B
20	4.16.21	Low	L1	7	1	7	1	A	B
8	4.25.21	Low	L1	7	1	7	1	A	D
10	4.7.2021	Low	L1	7	1	7	1	A	A
11	4.7.2021	Low	L1	7	1	7	1	A	A
15	9.16.21	Low	L1	7	1	7	1	A	F
16	9.16.21	Low	L1	7	1	7	1	A	F
15	4.16.21	Low	L2	7	0	7	0	A	B
16	4.16.21	Low	L2	7	0	7	0	A	B
17	4.16.21	Low	L2	7	0	7	0	A	B
18	4.16.21	Low	L2	7	0	7	0	A	B
19	4.16.21	Low	L2	7	0	7	0	A	B
20	4.16.21	Low	L2	7	0	7	0	A	B
18	4.16.21	Low	L2	7	0	7	0	B	B
19	4.16.21	Low	L2	7	0	7	0	B	B
20	4.16.21	Low	L2	7	0	7	0	B	B
18	4.23.21	Low	L2	7	0	7	0	B	C
19	4.23.21	Low	L2	7	0	7	0	B	C
20	4.23.21	Low	L2	7	0	7	0	B	C
10	4.25.21	Low	L2	7	0	3	0	A	D
11	4.25.21	Low	L2	7	0	4	0	A	D
12	4.25.21	Low	L2	7	0	4	0	A	D
13	4.25.21	Low	L2	7	0	5	0	A	D
14	4.25.21	Low	L2	7	0	6	0	A	D
15	4.25.21	Low	L2	7	0	7	0	A	D
16	4.25.21	Low	L2	7	0	7	0	A	D
17	4.25.21	Low	L2	7	0	7	0	A	D
18	4.25.21	Low	L2	7	0	7	0	A	D
19	4.25.21	Low	L2	7	0	7	0	A	D
20	4.25.21	Low	L2	7	0	7	0	A	D
6	4.25.21	Low	L2	7	0	7	0	B	D
7	4.25.21	Low	L2	7	0	7	0	B	D
8	4.25.21	Low	L2	7	0	7	0	B	D
9	4.25.21	Low	L2	7	0	7	0	B	D
10	4.25.21	Low	L2	7	0	7	0	B	D
11	4.25.21	Low	L2	7	0	7	0	B	D
12	4.25.21	Low	L2	7	0	7	0	B	D
13	4.25.21	Low	L2	7	0	7	0	B	D
14	4.25.21	Low	L2	7	0	7	0	B	D
15	4.25.21	Low	L2	7	0	7	0	B	D
16	4.25.21	Low	L2	7	0	7	0	B	D
17	4.25.21	Low	L2	7	0	7	0	B	D
18	4.25.21	Low	L2	7	0	7	0	B	D
19	4.25.21	Low	L2	7	0	7	0	B	D
20	4.25.21	Low	L2	7	0	7	0	B	D
8	4.7.2021	Low	L2	7	0	7	0	A	A
9	4.7.2021	Low	L2	7	0	7	0	A	A
10	4.7.2021	Low	L2	7	0	7	0	A	A
11	4.7.2021	Low	L2	7	0	7	0	A	A
12	4.7.2021	Low	L2	7	0	7	0	A	A
13	4.7.2021	Low	L2	7	0	7	0	A	A
14	4.7.2021	Low	L2	7	0	7	0	A	A
15	4.7.2021	Low	L2	7	0	7	0	A	A
16	4.7.2021	Low	L2	7	0	7	0	A	A
17	4.7.2021	Low	L2	7	0	7	0	A	A
18	4.7.2021	Low	L2	7	0	7	0	A	A
19	4.7.2021	Low	L2	7	0	6	0	A	A
20	4.7.2021	Low	L2	7	0	5	0	A	A
15	9.16.21	Low	L2	7	0	7	0	A	F
16	9.16.21	Low	L2	7	0	7	0	A	F
17	9.16.21	Low	L2	7	0	7	0	A	F
18	9.16.21	Low	L2	7	0	7	0	A	F
19	9.16.21	Low	L2	7	0	7	0	A	F
20	9.16.21	Low	L2	7	0	7	0	A	F
13	9.16.21	Low	L2	7	0	5	0	B	F
14	9.16.21	Low	L2	7	0	7	0	B	F
15	9.16.21	Low	L2	7	0	7	0	B	F
16	9.16.21	Low	L2	7	0	7	0	B	F
17	9.16.21	Low	L2	7	0	7	0	B	F
18	9.16.21	Low	L2	7	0	7	0	B	F
19	9.16.21	Low	L2	7	0	7	0	B	F
20	9.16.21	Low	L2	7	0	7	0	B	F
12	9.9.21	Low	L2	7	0	7	0	A	E
13	9.9.21	Low	L2	7	0	7	0	A	E
14	9.9.21	Low	L2	7	0	7	0	A	E
15	9.9.21	Low	L2	7	0	7	0	A	E
16	9.9.21	Low	L2	7	0	7	0	A	E
17	9.9.21	Low	L2	7	0	7	0	A	E
18	9.9.21	Low	L2	7	0	7	0	A	E
19	9.9.21	Low	L2	7	0	7	0	A	E
20	9.9.21	Low	L2	7	0	7	0	A	E
17	9.9.21	Low	L2	7	0	7	0	B	E
18	9.9.21	Low	L2	7	0	7	0	B	E
19	9.9.21	Low	L2	7	0	7	0	B	E
20	9.9.21	Low	L2	7	0	7	0	B	E
1	4.16.21	Low	L2	1	1	1	1	B	B
2	4.16.21	Low	L2	1	1	1	1	B	B
3	4.16.21	Low	L2	1	1	1	1	B	B
4	4.16.21	Low	L2	1	1	1	1	B	B
5	4.16.21	Low	L2	1	1	1	1	B	B
1	4.23.21	Low	L2	1	1	1	1	A	C
2	4.23.21	Low	L2	1	1	1	1	A	C
3	4.23.21	Low	L2	1	1	1	1	A	C
4	4.23.21	Low	L2	1	1	1	1	A	C
5	4.23.21	Low	L2	1	1	1	1	A	C
6	4.23.21	Low	L2	1	1	1	1	A	C
7	4.23.21	Low	L2	1	1	1	1	A	C
8	4.23.21	Low	L2	1	1	1	1	A	C
9	4.23.21	Low	L2	1	1	1	1	A	C
10	4.23.21	Low	L2	1	1	1	1	A	C
11	4.23.21	Low	L2	1	1	1	1	A	C
12	4.23.21	Low	L2	1	1	1	1	A	C
13	4.23.21	Low	L2	1	1	1	1	A	C
14	4.23.21	Low	L2	1	1	1	1	A	C
15	4.23.21	Low	L2	1	1	1	1	A	C
16	4.23.21	Low	L2	1	1	1	1	A	C
[truncated: 941 more rows]
