# Supplementary material for: Selection on plastic adherence leads to hyper-multicellular strains and incidental virulence in the budding yeast
Source: eLife. 2023 Nov 2;12:e81056. doi: 10.7554/eLife.81056 (PMC10764007; doi:10.7554/eLife.81056)
Supplement: Figure 3—source data 2. [file elife-81056-fig3-data2.csv]

Larva	Date	Time	Dead.is.1	Time.Pup.Included	Dead.1.Pup.Included	Replicate	Assay	Treatment	Strain.Treatment
1	6.25.2020	7	0	6	0	A	I	Control	ControlA
2	6.25.2020	7	0	6	0	A	I	Control	ControlA
3	6.25.2020	7	0	7	0	A	I	Control	ControlA
4	6.25.2020	7	0	7	0	A	I	Control	ControlA
5	6.25.2020	7	0	7	0	A	I	Control	ControlA
6	6.25.2020	7	0	7	0	A	I	Control	ControlA
7	6.25.2020	7	0	7	0	A	I	Control	ControlA
8	6.25.2020	7	0	7	0	A	I	Control	ControlA
9	6.25.2020	7	0	7	0	A	I	Control	ControlA
10	6.25.2020	7	0	7	0	A	I	Control	ControlA
11	6.25.2020	7	0	7	0	A	I	Control	ControlA
12	6.25.2020	7	0	7	0	A	I	Control	ControlA
13	6.25.2020	7	0	7	0	A	I	Control	ControlA
14	6.25.2020	7	0	7	0	A	I	Control	ControlA
15	6.25.2020	7	0	7	0	A	I	Control	ControlA
16	6.25.2020	7	0	7	0	A	I	Control	ControlA
17	6.25.2020	7	0	7	0	A	I	Control	ControlA
18	6.25.2020	7	0	7	0	A	I	Control	ControlA
19	6.25.2020	7	0	7	0	A	I	Control	ControlA
20	6.25.2020	7	0	7	0	A	I	Control	ControlA
1	6.25.2020	7	0	5	0	B	I	Control	ControlB
2	6.25.2020	7	0	6	0	B	I	Control	ControlB
3	6.25.2020	7	0	6	0	B	I	Control	ControlB
4	6.25.2020	7	0	7	0	B	I	Control	ControlB
5	6.25.2020	7	0	7	0	B	I	Control	ControlB
6	6.25.2020	7	0	7	0	B	I	Control	ControlB
7	6.25.2020	7	0	7	0	B	I	Control	ControlB
8	6.25.2020	7	0	7	0	B	I	Control	ControlB
9	6.25.2020	7	0	7	0	B	I	Control	ControlB
10	6.25.2020	7	0	7	0	B	I	Control	ControlB
11	6.25.2020	7	0	7	0	B	I	Control	ControlB
12	6.25.2020	7	0	7	0	B	I	Control	ControlB
13	6.25.2020	7	0	7	0	B	I	Control	ControlB
14	6.25.2020	7	0	7	0	B	I	Control	ControlB
15	6.25.2020	7	0	7	0	B	I	Control	ControlB
16	6.25.2020	7	0	7	0	B	I	Control	ControlB
17	6.25.2020	7	0	7	0	B	I	Control	ControlB
18	6.25.2020	7	0	7	0	B	I	Control	ControlB
19	6.25.2020	7	0	7	0	B	I	Control	ControlB
20	6.25.2020	7	0	7	0	B	I	Control	ControlB
1	6.26.2020	7	0	4	0	C	I	Control	ControlC
2	6.26.2020	7	0	5	0	C	I	Control	ControlC
3	6.26.2020	7	0	7	0	C	I	Control	ControlC
4	6.26.2020	7	0	7	0	C	I	Control	ControlC
5	6.26.2020	7	0	7	0	C	I	Control	ControlC
6	6.26.2020	7	0	7	0	C	I	Control	ControlC
7	6.26.2020	7	0	7	0	C	I	Control	ControlC
8	6.26.2020	7	0	7	0	C	I	Control	ControlC
9	6.26.2020	7	0	7	0	C	I	Control	ControlC
10	6.26.2020	7	0	7	0	C	I	Control	ControlC
11	6.26.2020	7	0	7	0	C	I	Control	ControlC
12	6.26.2020	7	0	7	0	C	I	Control	ControlC
13	6.26.2020	7	0	7	0	C	I	Control	ControlC
14	6.26.2020	7	0	7	0	C	I	Control	ControlC
15	6.26.2020	7	0	7	0	C	I	Control	ControlC
16	6.26.2020	7	0	7	0	C	I	Control	ControlC
17	6.26.2020	7	0	7	0	C	I	Control	ControlC
18	6.26.2020	7	0	7	0	C	I	Control	ControlC
19	6.26.2020	7	0	7	0	C	I	Control	ControlC
20	6.26.2020	7	0	7	0	C	I	Control	ControlC
1	6.26.2020	5	1	5	1	D	I	Control	ControlD
2	6.26.2020	6	1	6	1	D	I	Control	ControlD
3	6.26.2020	7	1	7	1	D	I	Control	ControlD
4	6.26.2020	7	1	7	1	D	I	Control	ControlD
5	6.26.2020	5	0	5	0	D	I	Control	ControlD
6	6.26.2020	7	0	7	0	D	I	Control	ControlD
7	6.26.2020	7	0	7	0	D	I	Control	ControlD
8	6.26.2020	7	0	7	0	D	I	Control	ControlD
9	6.26.2020	7	0	7	0	D	I	Control	ControlD
10	6.26.2020	7	0	7	0	D	I	Control	ControlD
11	6.26.2020	7	0	7	0	D	I	Control	ControlD
12	6.26.2020	7	0	7	0	D	I	Control	ControlD
13	6.26.2020	7	0	7	0	D	I	Control	ControlD
14	6.26.2020	7	0	7	0	D	I	Control	ControlD
15	6.26.2020	7	0	7	0	D	I	Control	ControlD
16	6.26.2020	7	0	7	0	D	I	Control	ControlD
17	6.26.2020	7	0	7	0	D	I	Control	ControlD
18	6.26.2020	7	0	7	0	D	I	Control	ControlD
19	6.26.2020	7	0	7	0	D	I	Control	ControlD
20	6.26.2020	7	0	7	0	D	I	Control	ControlD
1	6.25.2020	1	1	1	1	A	I	High	H1
2	6.25.2020	2	1	2	1	A	I	High	H1
3	6.25.2020	2	1	2	1	A	I	High	H1
4	6.25.2020	3	1	3	1	A	I	High	H1
5	6.25.2020	3	1	3	1	A	I	High	H1
6	6.25.2020	3	1	3	1	A	I	High	H1
7	6.25.2020	3	1	3	1	A	I	High	H1
8	6.25.2020	4	1	4	1	A	I	High	H1
9	6.25.2020	4	1	4	1	A	I	High	H1
10	6.25.2020	6	1	6	1	A	I	High	H1
11	6.25.2020	6	1	6	1	A	I	High	H1
12	6.25.2020	7	1	7	1	A	I	High	H1
13	6.25.2020	7	1	7	1	A	I	High	H1
14	6.25.2020	7	0	7	0	A	I	High	H1
15	6.25.2020	7	0	7	0	A	I	High	H1
16	6.25.2020	7	0	7	0	A	I	High	H1
17	6.25.2020	7	0	7	0	A	I	High	H1
18	6.25.2020	7	0	7	0	A	I	High	H1
19	6.25.2020	7	0	7	0	A	I	High	H1
20	6.25.2020	7	0	7	0	A	I	High	H1
1	6.26.2020	2	1	2	1	A	I	High	H2
2	6.26.2020	2	1	2	1	A	I	High	H2
3	6.26.2020	3	1	3	1	A	I	High	H2
4	6.26.2020	3	1	3	1	A	I	High	H2
5	6.26.2020	3	1	3	1	A	I	High	H2
6	6.26.2020	4	1	4	1	A	I	High	H2
7	6.26.2020	4	1	4	1	A	I	High	H2
8	6.26.2020	5	1	5	1	A	I	High	H2
9	6.26.2020	6	1	6	1	A	I	High	H2
10	6.26.2020	7	0	7	0	A	I	High	H2
11	6.26.2020	7	0	7	0	A	I	High	H2
12	6.26.2020	7	0	7	0	A	I	High	H2
13	6.26.2020	7	0	7	0	A	I	High	H2
14	6.26.2020	7	0	7	0	A	I	High	H2
15	6.26.2020	7	0	7	0	A	I	High	H2
16	6.26.2020	7	0	7	0	A	I	High	H2
17	6.26.2020	7	0	7	0	A	I	High	H2
18	6.26.2020	7	0	7	0	A	I	High	H2
19	6.26.2020	7	0	7	0	A	I	High	H2
20	6.26.2020	7	0	7	0	A	I	High	H2
1	6.26.2020	1	1	1	1	A	I	High	H3
2	6.26.2020	1	1	1	1	A	I	High	H3
3	6.26.2020	1	1	1	1	A	I	High	H3
4	6.26.2020	1	1	1	1	A	I	High	H3
5	6.26.2020	1	1	1	1	A	I	High	H3
6	6.26.2020	2	1	2	1	A	I	High	H3
7	6.26.2020	4	1	4	1	A	I	High	H3
8	6.26.2020	4	1	4	1	A	I	High	H3
9	6.26.2020	5	1	5	1	A	I	High	H3
10	6.26.2020	5	1	5	1	A	I	High	H3
11	6.26.2020	6	1	6	1	A	I	High	H3
12	6.26.2020	6	1	6	1	A	I	High	H3
13	6.26.2020	7	1	7	1	A	I	High	H3
14	6.26.2020	7	1	7	1	A	I	High	H3
15	6.26.2020	7	0	7	0	A	I	High	H3
16	6.26.2020	7	0	7	0	A	I	High	H3
17	6.26.2020	7	0	7	0	A	I	High	H3
18	6.26.2020	7	0	7	0	A	I	High	H3
19	6.26.2020	7	0	7	0	A	I	High	H3
20	6.26.2020	7	0	7	0	A	I	High	H3
1	6.26.2020	1	1	1	1	A	I	High	H4
2	6.26.2020	1	1	1	1	A	I	High	H4
3	6.26.2020	2	1	2	1	A	I	High	H4
4	6.26.2020	2	1	2	1	A	I	High	H4
5	6.26.2020	2	1	2	1	A	I	High	H4
6	6.26.2020	2	1	2	1	A	I	High	H4
7	6.26.2020	3	1	3	1	A	I	High	H4
8	6.26.2020	4	1	4	1	A	I	High	H4
9	6.26.2020	4	1	4	1	A	I	High	H4
10	6.26.2020	5	1	5	1	A	I	High	H4
11	6.26.2020	6	1	6	1	A	I	High	H4
12	6.26.2020	7	1	7	1	A	I	High	H4
13	6.26.2020	7	1	7	1	A	I	High	H4
14	6.26.2020	7	1	7	1	A	I	High	H4
15	6.26.2020	7	0	7	0	A	I	High	H4
16	6.26.2020	7	0	7	0	A	I	High	H4
17	6.26.2020	7	0	7	0	A	I	High	H4
18	6.26.2020	7	0	7	0	A	I	High	H4
19	6.26.2020	7	0	7	0	A	I	High	H4
20	6.26.2020	7	0	7	0	A	I	High	H4
1	6.26.2020	1	1	1	1	A	I	High	H5
2	6.26.2020	1	1	1	1	A	I	High	H5
3	6.26.2020	2	1	2	1	A	I	High	H5
4	6.26.2020	2	1	2	1	A	I	High	H5
5	6.26.2020	2	1	2	1	A	I	High	H5
6	6.26.2020	4	1	4	1	A	I	High	H5
7	6.26.2020	7	0	7	0	A	I	High	H5
8	6.26.2020	7	0	7	0	A	I	High	H5
9	6.26.2020	7	0	7	0	A	I	High	H5
10	6.26.2020	7	0	7	0	A	I	High	H5
11	6.26.2020	7	0	7	0	A	I	High	H5
12	6.26.2020	7	0	7	0	A	I	High	H5
13	6.26.2020	7	0	7	0	A	I	High	H5
14	6.26.2020	7	0	7	0	A	I	High	H5
15	6.26.2020	7	0	7	0	A	I	High	H5
16	6.26.2020	7	0	7	0	A	I	High	H5
17	6.26.2020	7	0	7	0	A	I	High	H5
18	6.26.2020	7	0	7	0	A	I	High	H5
19	6.26.2020	7	0	7	0	A	I	High	H5
20	6.26.2020	7	0	7	0	A	I	High	H5
1	6.26.2020	1	1	1	1	A	I	High	H6
2	6.26.2020	1	1	1	1	A	I	High	H6
3	6.26.2020	1	1	1	1	A	I	High	H6
4	6.26.2020	1	1	1	1	A	I	High	H6
5	6.26.2020	1	1	1	1	A	I	High	H6
6	6.26.2020	1	1	1	1	A	I	High	H6
7	6.26.2020	2	1	2	1	A	I	High	H6
8	6.26.2020	2	1	2	1	A	I	High	H6
9	6.26.2020	2	1	2	1	A	I	High	H6
10	6.26.2020	5	1	5	1	A	I	High	H6
11	6.26.2020	5	1	5	1	A	I	High	H6
12	6.26.2020	6	1	6	1	A	I	High	H6
13	6.26.2020	7	1	7	1	A	I	High	H6
14	6.26.2020	7	1	7	1	A	I	High	H6
15	6.26.2020	7	1	7	1	A	I	High	H6
16	6.26.2020	7	0	7	0	A	I	High	H6
17	6.26.2020	7	0	7	0	A	I	High	H6
18	6.26.2020	7	0	7	0	A	I	High	H6
19	6.26.2020	7	0	7	0	A	I	High	H6
20	6.26.2020	7	0	7	0	A	I	High	H6
1	6.25.2020	1	1	1	1	A	I	Low	L1
2	6.25.2020	1	1	1	1	A	I	Low	L1
3	6.25.2020	2	1	2	1	A	I	Low	L1
4	6.25.2020	2	1	2	1	A	I	Low	L1
5	6.25.2020	2	1	2	1	A	I	Low	L1
6	6.25.2020	2	1	2	1	A	I	Low	L1
7	6.25.2020	3	1	3	1	A	I	Low	L1
8	6.25.2020	3	1	3	1	A	I	Low	L1
9	6.25.2020	3	1	3	1	A	I	Low	L1
10	6.25.2020	4	1	4	1	A	I	Low	L1
11	6.25.2020	5	1	5	1	A	I	Low	L1
12	6.25.2020	5	1	5	1	A	I	Low	L1
13	6.25.2020	6	1	6	1	A	I	Low	L1
14	6.25.2020	7	1	7	1	A	I	Low	L1
15	6.25.2020	7	0	7	0	A	I	Low	L1
16	6.25.2020	7	0	7	0	A	I	Low	L1
17	6.25.2020	7	0	7	0	A	I	Low	L1
18	6.25.2020	7	0	7	0	A	I	Low	L1
19	6.25.2020	7	0	7	0	A	I	Low	L1
20	6.25.2020	7	0	7	0	A	I	Low	L1
1	6.25.2020	1	1	1	1	A	I	Low	L2
2	6.25.2020	1	1	1	1	A	I	Low	L2
3	6.25.2020	3	1	3	1	A	I	Low	L2
4	6.25.2020	3	1	3	1	A	I	Low	L2
5	6.25.2020	4	1	4	1	A	I	Low	L2
6	6.25.2020	4	1	4	1	A	I	Low	L2
7	6.25.2020	5	1	5	1	A	I	Low	L2
8	6.25.2020	6	1	6	1	A	I	Low	L2
9	6.25.2020	6	1	6	1	A	I	Low	L2
10	6.25.2020	6	1	6	1	A	I	Low	L2
11	6.25.2020	6	1	6	1	A	I	Low	L2
12	6.25.2020	7	1	7	1	A	I	Low	L2
13	6.25.2020	7	1	7	1	A	I	Low	L2
14	6.25.2020	7	0	7	0	A	I	Low	L2
15	6.25.2020	7	0	7	0	A	I	Low	L2
16	6.25.2020	7	0	7	0	A	I	Low	L2
17	6.25.2020	7	0	7	0	A	I	Low	L2
18	6.25.2020	7	0	7	0	A	I	Low	L2
19	6.25.2020	7	0	7	0	A	I	Low	L2
20	6.25.2020	7	0	7	0	A	I	Low	L2
1	6.25.2020	1	1	1	1	A	I	Low	L3
2	6.25.2020	1	1	1	1	A	I	Low	L3
3	6.25.2020	1	1	1	1	A	I	Low	L3
4	6.25.2020	1	1	1	1	A	I	Low	L3
5	6.25.2020	1	1	1	1	A	I	Low	L3
6	6.25.2020	6	1	6	1	A	I	Low	L3
7	6.25.2020	3	1	3	1	A	I	Low	L3
8	6.25.2020	3	1	3	1	A	I	Low	L3
9	6.25.2020	3	1	3	1	A	I	Low	L3
10	6.25.2020	4	1	4	1	A	I	Low	L3
11	6.25.2020	5	1	5	1	A	I	Low	L3
12	6.25.2020	6	1	6	1	A	I	Low	L3
13	6.25.2020	6	1	6	1	A	I	Low	L3
14	6.25.2020	7	1	7	1	A	I	Low	L3
15	6.25.2020	7	1	7	1	A	I	Low	L3
16	6.25.2020	7	0	7	0	A	I	Low	L3
17	6.25.2020	7	0	7	0	A	I	Low	L3
18	6.25.2020	7	0	7	0	A	I	Low	L3
19	6.25.2020	7	0	7	0	A	I	Low	L3
20	6.25.2020	7	0	7	0	A	I	Low	L3
1	6.26.2020	1	1	1	1	A	I	Low	L4
2	6.26.2020	2	1	2	1	A	I	Low	L4
3	6.26.2020	3	1	3	1	A	I	Low	L4
4	6.26.2020	5	1	5	1	A	I	Low	L4
5	6.26.2020	6	1	6	1	A	I	Low	L4
6	6.26.2020	7	1	7	1	A	I	Low	L4
7	6.26.2020	7	1	7	1	A	I	Low	L4
8	6.26.2020	7	0	7	0	A	I	Low	L4
9	6.26.2020	7	0	7	0	A	I	Low	L4
10	6.26.2020	7	0	7	0	A	I	Low	L4
11	6.26.2020	7	0	7	0	A	I	Low	L4
12	6.26.2020	7	0	7	0	A	I	Low	L4
13	6.26.2020	7	0	7	0	A	I	Low	L4
14	6.26.2020	7	0	7	0	A	I	Low	L4
15	6.26.2020	7	0	7	0	A	I	Low	L4
16	6.26.2020	7	0	7	0	A	I	Low	L4
17	6.26.2020	7	0	7	0	A	I	Low	L4
18	6.26.2020	7	0	7	0	A	I	Low	L4
19	6.26.2020	7	0	7	0	A	I	Low	L4
20	6.26.2020	7	0	7	0	A	I	Low	L4
1	6.26.2020	1	1	1	1	A	I	Low	L5
2	6.26.2020	1	1	1	1	A	I	Low	L5
3	6.26.2020	2	1	2	1	A	I	Low	L5
4	6.26.2020	2	1	2	1	A	I	Low	L5
5	6.26.2020	3	1	3	1	A	I	Low	L5
6	6.26.2020	3	1	3	1	A	I	Low	L5
7	6.26.2020	3	1	3	1	A	I	Low	L5
8	6.26.2020	3	1	3	1	A	I	Low	L5
9	6.26.2020	3	1	3	1	A	I	Low	L5
10	6.26.2020	3	1	3	1	A	I	Low	L5
11	6.26.2020	3	1	3	1	A	I	Low	L5
12	6.26.2020	3	1	3	1	A	I	Low	L5
13	6.26.2020	4	1	4	1	A	I	Low	L5
14	6.26.2020	4	1	4	1	A	I	Low	L5
15	6.26.2020	5	1	5	1	A	I	Low	L5
16	6.26.2020	7	1	7	1	A	I	Low	L5
17	6.26.2020	7	0	7	0	A	I	Low	L5
18	6.26.2020	7	0	7	0	A	I	Low	L5
19	6.26.2020	7	0	7	0	A	I	Low	L5
20	6.26.2020	7	0	7	0	A	I	Low	L5
1	6.25.2020	1	1	1	1	A	I	Low	L6
2	6.25.2020	1	1	1	1	A	I	Low	L6
3	6.25.2020	1	1	1	1	A	I	Low	L6
4	6.25.2020	1	1	1	1	A	I	Low	L6
5	6.25.2020	1	1	1	1	A	I	Low	L6
6	6.25.2020	1	1	1	1	A	I	Low	L6
7	6.25.2020	1	1	1	1	A	I	Low	L6
8	6.25.2020	3	1	3	1	A	I	Low	L6
9	6.25.2020	3	1	3	1	A	I	Low	L6
10	6.25.2020	3	1	3	1	A	I	Low	L6
11	6.25.2020	4	1	4	1	A	I	Low	L6
12	6.25.2020	5	1	5	1	A	I	Low	L6
13	6.25.2020	5	1	5	1	A	I	Low	L6
14	6.25.2020	6	1	6	1	A	I	Low	L6
15	6.25.2020	6	1	6	1	A	I	Low	L6
16	6.25.2020	7	1	7	1	A	I	Low	L6
17	6.25.2020	7	0	3	0	A	I	Low	L6
18	6.25.2020	7	0	7	0	A	I	Low	L6
19	6.25.2020	7	0	7	0	A	I	Low	L6
20	6.25.2020	7	0	7	0	A	I	Low	L6
1	7.2.2020	7	0	2	0	A	J	Control	ControlA
2	7.2.2020	7	0	4	0	A	J	Control	ControlA
3	7.2.2020	7	0	4	0	A	J	Control	ControlA
4	7.2.2020	7	0	4	0	A	J	Control	ControlA
5	7.2.2020	7	0	4	0	A	J	Control	ControlA
6	7.2.2020	7	0	4	0	A	J	Control	ControlA
7	7.2.2020	7	0	4	0	A	J	Control	ControlA
8	7.2.2020	7	0	6	0	A	J	Control	ControlA
9	7.2.2020	7	0	6	0	A	J	Control	ControlA
10	7.2.2020	7	0	7	0	A	J	Control	ControlA
11	7.2.2020	7	0	7	0	A	J	Control	ControlA
12	7.2.2020	7	0	7	0	A	J	Control	ControlA
13	7.2.2020	7	0	7	0	A	J	Control	ControlA
14	7.2.2020	7	0	8	0	A	J	Control	ControlA
15	7.2.2020	7	0	8	0	A	J	Control	ControlA
16	7.2.2020	7	0	8	0	A	J	Control	ControlA
17	7.2.2020	7	0	8	0	A	J	Control	ControlA
18	7.2.2020	7	0	8	0	A	J	Control	ControlA
19	7.2.2020	7	0	8	0	A	J	Control	ControlA
20	7.2.2020	7	0	8	0	A	J	Control	ControlA
1	7.3.2020	5	1	5	1	B	J	Control	ControlB
2	7.3.2020	7	0	3	0	B	J	Control	ControlB
3	7.3.2020	7	0	3	0	B	J	Control	ControlB
4	7.3.2020	7	0	3	0	B	J	Control	ControlB
5	7.3.2020	7	0	4	0	B	J	Control	ControlB
6	7.3.2020	7	0	4	0	B	J	Control	ControlB
7	7.3.2020	7	0	4	0	B	J	Control	ControlB
8	7.3.2020	7	0	4	0	B	J	Control	ControlB
9	7.3.2020	7	0	5	0	B	J	Control	ControlB
10	7.3.2020	7	0	5	0	B	J	Control	ControlB
11	7.3.2020	7	0	5	0	B	J	Control	ControlB
12	7.3.2020	7	0	6	0	B	J	Control	ControlB
13	7.3.2020	7	0	6	0	B	J	Control	ControlB
14	7.3.2020	7	0	6	0	B	J	Control	ControlB
15	7.3.2020	7	0	7	0	B	J	Control	ControlB
16	7.3.2020	7	0	7	0	B	J	Control	ControlB
17	7.3.2020	7	0	8	0	B	J	Control	ControlB
18	7.3.2020	7	0	8	0	B	J	Control	ControlB
19	7.3.2020	7	0	8	0	B	J	Control	ControlB
20	7.3.2020	7	0	8	0	B	J	Control	ControlB
1	7.2.2020	1	1	1	1	C	J	Control	ControlC
2	7.2.2020	7	0	3	0	C	J	Control	ControlC
3	7.2.2020	7	0	3	0	C	J	Control	ControlC
4	7.2.2020	7	0	3	0	C	J	Control	ControlC
5	7.2.2020	7	0	4	0	C	J	Control	ControlC
6	7.2.2020	7	0	4	0	C	J	Control	ControlC
7	7.2.2020	7	0	4	0	C	J	Control	ControlC
8	7.2.2020	7	0	4	0	C	J	Control	ControlC
9	7.2.2020	7	0	4	0	C	J	Control	ControlC
10	7.2.2020	7	0	5	0	C	J	Control	ControlC
11	7.2.2020	7	0	6	0	C	J	Control	ControlC
12	7.2.2020	7	0	6	0	C	J	Control	ControlC
13	7.2.2020	7	0	6	0	C	J	Control	ControlC
14	7.2.2020	7	0	6	0	C	J	Control	ControlC
15	7.2.2020	7	0	7	0	C	J	Control	ControlC
16	7.2.2020	7	0	7	0	C	J	Control	ControlC
17	7.2.2020	7	0	8	0	C	J	Control	ControlC
18	7.2.2020	7	0	8	0	C	J	Control	ControlC
19	7.2.2020	7	0	8	0	C	J	Control	ControlC
20	7.2.2020	7	0	8	0	C	J	Control	ControlC
1	7.3.2020	2	1	2	1	D	J	Control	ControlD
2	7.3.2020	5	1	5	1	D	J	Control	ControlD
3	7.3.2020	7	0	2	0	D	J	Control	ControlD
4	7.3.2020	7	0	3	0	D	J	Control	ControlD
5	7.3.2020	7	0	3	0	D	J	Control	ControlD
6	7.3.2020	7	0	3	0	D	J	Control	ControlD
7	7.3.2020	7	0	3	0	D	J	Control	ControlD
8	7.3.2020	7	0	4	0	D	J	Control	ControlD
9	7.3.2020	7	0	5	0	D	J	Control	ControlD
10	7.3.2020	7	0	5	0	D	J	Control	ControlD
11	7.3.2020	7	0	6	0	D	J	Control	ControlD
12	7.3.2020	7	0	6	0	D	J	Control	ControlD
13	7.3.2020	7	0	8	0	D	J	Control	ControlD
14	7.3.2020	7	0	8	0	D	J	Control	ControlD
15	7.3.2020	7	0	8	0	D	J	Control	ControlD
16	7.3.2020	7	0	8	0	D	J	Control	ControlD
17	7.3.2020	7	0	8	0	D	J	Control	ControlD
18	7.3.2020	7	0	8	0	D	J	Control	ControlD
19	7.3.2020	7	0	8	0	D	J	Control	ControlD
20	7.3.2020	7	0	8	0	D	J	Control	ControlD
1	7.2.2020	1	1	1	1	A	J	High	H1
2	7.2.2020	1	1	1	1	A	J	High	H1
3	7.2.2020	1	1	1	1	A	J	High	H1
4	7.2.2020	1	1	1	1	A	J	High	H1
5	7.2.2020	1	1	1	1	A	J	High	H1
6	7.2.2020	2	1	2	1	A	J	High	H1
7	7.2.2020	2	1	2	1	A	J	High	H1
8	7.2.2020	2	1	2	1	A	J	High	H1
9	7.2.2020	2	1	2	1	A	J	High	H1
10	7.2.2020	2	1	2	1	A	J	High	H1
11	7.2.2020	2	1	2	1	A	J	High	H1
12	7.2.2020	3	1	3	1	A	J	High	H1
13	7.2.2020	3	1	3	1	A	J	High	H1
14	7.2.2020	4	1	4	1	A	J	High	H1
15	7.2.2020	5	1	5	1	A	J	High	H1
16	7.2.2020	6	1	6	1	A	J	High	H1
17	7.2.2020	6	1	6	1	A	J	High	H1
18	7.2.2020	7	1	7	1	A	J	High	H1
19	7.2.2020	7	1	7	1	A	J	High	H1
20	7.2.2020	7	0	8	0	A	J	High	H1
1	7.2.2020	1	1	1	1	A	J	High	H2
2	7.2.2020	1	1	1	1	A	J	High	H2
3	7.2.2020	1	1	1	1	A	J	High	H2
4	7.2.2020	1	1	1	1	A	J	High	H2
5	7.2.2020	1	1	1	1	A	J	High	H2
6	7.2.2020	2	1	2	1	A	J	High	H2
7	7.2.2020	2	1	2	1	A	J	High	H2
8	7.2.2020	2	1	2	1	A	J	High	H2
9	7.2.2020	2	1	2	1	A	J	High	H2
10	7.2.2020	2	1	2	1	A	J	High	H2
11	7.2.2020	2	1	2	1	A	J	High	H2
12	7.2.2020	2	1	2	1	A	J	High	H2
13	7.2.2020	3	1	3	1	A	J	High	H2
14	7.2.2020	3	1	3	1	A	J	High	H2
15	7.2.2020	3	1	3	1	A	J	High	H2
16	7.2.2020	7	1	7	1	A	J	High	H2
17	7.2.2020	7	0	5	0	A	J	High	H2
18	7.2.2020	7	0	6	0	A	J	High	H2
19	7.2.2020	7	0	8	0	A	J	High	H2
20	7.2.2020	7	0	8	0	A	J	High	H2
1	7.2.2020	1	1	1	1	A	J	High	H3
2	7.2.2020	1	1	1	1	A	J	High	H3
3	7.2.2020	1	1	1	1	A	J	High	H3
4	7.2.2020	1	1	1	1	A	J	High	H3
5	7.2.2020	1	1	1	1	A	J	High	H3
6	7.2.2020	1	1	1	1	A	J	High	H3
7	7.2.2020	1	1	1	1	A	J	High	H3
8	7.2.2020	1	1	1	1	A	J	High	H3
9	7.2.2020	2	1	2	1	A	J	High	H3
10	7.2.2020	2	1	2	1	A	J	High	H3
11	7.2.2020	2	1	2	1	A	J	High	H3
12	7.2.2020	3	1	3	1	A	J	High	H3
13	7.2.2020	3	1	3	1	A	J	High	H3
14	7.2.2020	4	1	4	1	A	J	High	H3
15	7.2.2020	4	1	4	1	A	J	High	H3
16	7.2.2020	4	1	4	1	A	J	High	H3
17	7.2.2020	4	1	4	1	A	J	High	H3
18	7.2.2020	7	1	7	1	A	J	High	H3
19	7.2.2020	7	1	7	1	A	J	High	H3
20	7.2.2020	7	0	8	0	A	J	High	H3
1	7.3.2020	1	1	1	1	A	J	High	H4
2	7.3.2020	1	1	1	1	A	J	High	H4
3	7.3.2020	1	1	1	1	A	J	High	H4
4	7.3.2020	1	1	1	1	A	J	High	H4
5	7.3.2020	2	1	2	1	A	J	High	H4
6	7.3.2020	2	1	2	1	A	J	High	H4
7	7.3.2020	2	1	2	1	A	J	High	H4
8	7.3.2020	2	1	2	1	A	J	High	H4
9	7.3.2020	3	1	3	1	A	J	High	H4
10	7.3.2020	3	1	3	1	A	J	High	H4
11	7.3.2020	3	1	3	1	A	J	High	H4
12	7.3.2020	5	1	5	1	A	J	High	H4
13	7.3.2020	6	1	6	1	A	J	High	H4
14	7.3.2020	6	1	6	1	A	J	High	H4
15	7.3.2020	6	1	6	1	A	J	High	H4
16	7.3.2020	6	1	6	1	A	J	High	H4
17	7.3.2020	7	1	7	1	A	J	High	H4
18	7.3.2020	7	0	8	1	A	J	High	H4
19	7.3.2020	7	0	8	0	A	J	High	H4
20	7.3.2020	7	0	8	0	A	J	High	H4
1	7.3.2020	1	1	1	1	A	J	High	H5
2	7.3.2020	2	1	2	1	A	J	High	H5
3	7.3.2020	2	1	2	1	A	J	High	H5
4	7.3.2020	2	1	2	1	A	J	High	H5
5	7.3.2020	2	1	2	1	A	J	High	H5
6	7.3.2020	2	1	2	1	A	J	High	H5
7	7.3.2020	2	1	2	1	A	J	High	H5
8	7.3.2020	2	1	2	1	A	J	High	H5
9	7.3.2020	2	1	2	1	A	J	High	H5
10	7.3.2020	2	1	2	1	A	J	High	H5
11	7.3.2020	2	1	2	1	A	J	High	H5
12	7.3.2020	2	1	2	1	A	J	High	H5
13	7.3.2020	2	1	2	1	A	J	High	H5
14	7.3.2020	2	1	2	1	A	J	High	H5
15	7.3.2020	2	1	2	1	A	J	High	H5
16	7.3.2020	2	1	2	1	A	J	High	H5
17	7.3.2020	2	1	2	1	A	J	High	H5
18	7.3.2020	2	1	2	1	A	J	High	H5
19	7.3.2020	2	1	2	1	A	J	High	H5
20	7.3.2020	7	0	6	0	A	J	High	H5
1	7.3.2020	2	1	2	1	A	J	High	H6
2	7.3.2020	2	1	2	1	A	J	High	H6
3	7.3.2020	2	1	2	1	A	J	High	H6
4	7.3.2020	3	1	3	1	A	J	High	H6
5	7.3.2020	3	1	3	1	A	J	High	H6
6	7.3.2020	3	1	3	1	A	J	High	H6
7	7.3.2020	4	1	4	1	A	J	High	H6
8	7.3.2020	5	1	5	1	A	J	High	H6
9	7.3.2020	7	1	7	1	A	J	High	H6
10	7.3.2020	7	1	7	1	A	J	High	H6
11	7.3.2020	7	1	7	1	A	J	High	H6
12	7.3.2020	7	0	8	1	A	J	High	H6
13	7.3.2020	7	0	8	1	A	J	High	H6
14	7.3.2020	7	0	8	1	A	J	High	H6
15	7.3.2020	7	0	6	0	A	J	High	H6
16	7.3.2020	7	0	8	0	A	J	High	H6
17	7.3.2020	7	0	8	0	A	J	High	H6
18	7.3.2020	7	0	8	0	A	J	High	H6
19	7.3.2020	7	0	8	0	A	J	High	H6
20	7.3.2020	7	0	8	0	A	J	High	H6
1	7.2.2020	1	1	1	1	A	J	Low	L1
2	7.2.2020	1	1	1	1	A	J	Low	L1
3	7.2.2020	2	1	2	1	A	J	Low	L1
4	7.2.2020	3	1	3	1	A	J	Low	L1
5	7.2.2020	3	1	3	1	A	J	Low	L1
6	7.2.2020	4	1	4	1	A	J	Low	L1
7	7.2.2020	4	1	4	1	A	J	Low	L1
8	7.2.2020	6	1	6	1	A	J	Low	L1
9	7.2.2020	7	1	7	1	A	J	Low	L1
10	7.2.2020	7	1	7	1	A	J	Low	L1
11	7.2.2020	7	0	8	1	A	J	Low	L1
12	7.2.2020	7	0	6	0	A	J	Low	L1
13	7.2.2020	7	0	8	0	A	J	Low	L1
14	7.2.2020	7	0	8	0	A	J	Low	L1
15	7.2.2020	7	0	8	0	A	J	Low	L1
16	7.2.2020	7	0	8	0	A	J	Low	L1
17	7.2.2020	7	0	8	0	A	J	Low	L1
18	7.2.2020	7	0	8	0	A	J	Low	L1
19	7.2.2020	7	0	8	0	A	J	Low	L1
20	7.2.2020	7	0	8	0	A	J	Low	L1
1	7.2.2020	1	1	1	1	A	J	Low	L2
2	7.2.2020	2	1	2	1	A	J	Low	L2
3	7.2.2020	2	1	2	1	A	J	Low	L2
4	7.2.2020	2	1	2	1	A	J	Low	L2
5	7.2.2020	5	1	5	1	A	J	Low	L2
6	7.2.2020	6	1	6	1	A	J	Low	L2
7	7.2.2020	7	1	7	1	A	J	Low	L2
8	7.2.2020	7	1	7	1	A	J	Low	L2
9	7.2.2020	7	1	7	1	A	J	Low	L2
10	7.2.2020	7	0	8	0	A	J	Low	L2
11	7.2.2020	7	0	8	0	A	J	Low	L2
12	7.2.2020	7	0	8	0	A	J	Low	L2
13	7.2.2020	7	0	8	0	A	J	Low	L2
14	7.2.2020	7	0	8	0	A	J	Low	L2
15	7.2.2020	7	0	8	0	A	J	Low	L2
16	7.2.2020	7	0	8	0	A	J	Low	L2
17	7.2.2020	7	0	8	0	A	J	Low	L2
18	7.2.2020	7	0	8	0	A	J	Low	L2
19	7.2.2020	7	0	8	0	A	J	Low	L2
20	7.2.2020	7	0	8	0	A	J	Low	L2
1	7.2.2020	1	1	1	1	A	J	Low	L3
2	7.2.2020	1	1	1	1	A	J	Low	L3
3	7.2.2020	1	1	1	1	A	J	Low	L3
4	7.2.2020	1	1	1	1	A	J	Low	L3
5	7.2.2020	1	1	1	1	A	J	Low	L3
6	7.2.2020	2	1	2	1	A	J	Low	L3
7	7.2.2020	2	1	2	1	A	J	Low	L3
8	7.2.2020	2	1	2	1	A	J	Low	L3
9	7.2.2020	2	1	2	1	A	J	Low	L3
10	7.2.2020	2	0	2	0	A	J	Low	L3
11	7.2.2020	3	1	3	1	A	J	Low	L3
12	7.2.2020	3	1	3	1	A	J	Low	L3
13	7.2.2020	7	0	8	1	A	J	Low	L3
14	7.2.2020	7	0	8	0	A	J	Low	L3
15	7.2.2020	7	0	8	0	A	J	Low	L3
16	7.2.2020	7	0	8	0	A	J	Low	L3
17	7.2.2020	7	0	8	0	A	J	Low	L3
18	7.2.2020	7	0	8	0	A	J	Low	L3
19	7.2.2020	7	0	8	0	A	J	Low	L3
20	7.2.2020	7	0	8	0	A	J	Low	L3
1	7.3.2020	1	1	1	1	A	J	Low	L4
2	7.3.2020	2	1	2	1	A	J	Low	L4
3	7.3.2020	3	1	3	1	A	J	Low	L4
4	7.3.2020	3	1	3	1	A	J	Low	L4
5	7.3.2020	3	1	3	1	A	J	Low	L4
6	7.3.2020	3	1	3	1	A	J	Low	L4
7	7.3.2020	6	1	6	1	A	J	Low	L4
8	7.3.2020	6	1	6	1	A	J	Low	L4
9	7.3.2020	6	1	6	1	A	J	Low	L4
10	7.3.2020	7	1	7	1	A	J	Low	L4
11	7.3.2020	7	1	7	1	A	J	Low	L4
12	7.3.2020	7	1	7	1	A	J	Low	L4
13	7.3.2020	7	0	8	1	A	J	Low	L4
14	7.3.2020	7	0	2	0	A	J	Low	L4
15	7.3.2020	7	0	8	0	A	J	Low	L4
16	7.3.2020	7	0	8	0	A	J	Low	L4
17	7.3.2020	7	0	8	0	A	J	Low	L4
18	7.3.2020	7	0	8	0	A	J	Low	L4
19	7.3.2020	7	0	8	0	A	J	Low	L4
20	7.3.2020	7	0	8	0	A	J	Low	L4
1	7.3.2020	1	1	1	1	A	J	Low	L5
2	7.3.2020	2	1	2	1	A	J	Low	L5
3	7.3.2020	2	1	2	1	A	J	Low	L5
4	7.3.2020	3	1	3	1	A	J	Low	L5
5	7.3.2020	4	1	4	1	A	J	Low	L5
6	7.3.2020	4	1	4	1	A	J	Low	L5
7	7.3.2020	5	1	5	1	A	J	Low	L5
8	7.3.2020	5	1	5	1	A	J	Low	L5
9	7.3.2020	6	1	6	1	A	J	Low	L5
10	7.3.2020	6	1	6	1	A	J	Low	L5
11	7.3.2020	7	1	7	1	A	J	Low	L5
12	7.3.2020	7	0	8	1	A	J	Low	L5
13	7.3.2020	7	0	3	0	A	J	Low	L5
14	7.3.2020	7	0	8	0	A	J	Low	L5
15	7.3.2020	7	0	8	0	A	J	Low	L5
16	7.3.2020	7	0	8	0	A	J	Low	L5
17	7.3.2020	7	0	8	0	A	J	Low	L5
18	7.3.2020	7	0	8	0	A	J	Low	L5
19	7.3.2020	7	0	8	0	A	J	Low	L5
20	7.3.2020	7	0	8	0	A	J	Low	L5
1	7.2.2020	1	1	1	1	A	J	Low	L6
2	7.2.2020	2	1	2	1	A	J	Low	L6
3	7.2.2020	2	1	2	1	A	J	Low	L6
4	7.2.2020	2	1	2	1	A	J	Low	L6
5	7.2.2020	2	1	2	1	A	J	Low	L6
6	7.2.2020	2	1	2	1	A	J	Low	L6
7	7.2.2020	2	1	2	1	A	J	Low	L6
8	7.2.2020	2	1	2	1	A	J	Low	L6
9	7.2.2020	3	1	3	1	A	J	Low	L6
10	7.2.2020	4	1	4	1	A	J	Low	L6
11	7.2.2020	4	1	4	1	A	J	Low	L6
12	7.2.2020	6	1	6	1	A	J	Low	L6
13	7.2.2020	6	1	6	1	A	J	Low	L6
14	7.2.2020	6	1	6	1	A	J	Low	L6
15	7.2.2020	7	1	7	1	A	J	Low	L6
16	7.2.2020	7	0	8	0	A	J	Low	L6
17	7.2.2020	7	0	8	0	A	J	Low	L6
18	7.2.2020	7	0	8	0	A	J	Low	L6
19	7.2.2020	7	0	8	0	A	J	Low	L6
20	7.2.2020	7	0	8	0	A	J	Low	L6
1	7.8.2020	7	0	5	0	A	K	Control	ControlA
2	7.8.2020	7	0	5	0	A	K	Control	ControlA
3	7.8.2020	7	0	5	0	A	K	Control	ControlA
4	7.8.2020	7	0	5	0	A	K	Control	ControlA
5	7.8.2020	7	0	5	0	A	K	Control	ControlA
6	7.8.2020	7	0	6	0	A	K	Control	ControlA
7	7.8.2020	7	0	6	0	A	K	Control	ControlA
8	7.8.2020	7	0	6	0	A	K	Control	ControlA
9	7.8.2020	7	0	6	0	A	K	Control	ControlA
10	7.8.2020	7	0	7	0	A	K	Control	ControlA
11	7.8.2020	7	0	7	0	A	K	Control	ControlA
12	7.8.2020	7	0	7	0	A	K	Control	ControlA
13	7.8.2020	7	0	7	0	A	K	Control	ControlA
14	7.8.2020	7	0	7	0	A	K	Control	ControlA
15	7.8.2020	7	0	7	0	A	K	Control	ControlA
16	7.8.2020	7	0	7	0	A	K	Control	ControlA
17	7.8.2020	7	0	7	0	A	K	Control	ControlA
18	7.8.2020	7	0	7	0	A	K	Control	ControlA
19	7.8.2020	7	0	7	0	A	K	Control	ControlA
20	7.8.2020	7	0	7	0	A	K	Control	ControlA
1	7.8.2020	7	0	4	0	B	K	Control	ControlB
2	7.8.2020	7	0	4	0	B	K	Control	ControlB
3	7.8.2020	7	0	4	0	B	K	Control	ControlB
4	7.8.2020	7	0	4	0	B	K	Control	ControlB
5	7.8.2020	7	0	4	0	B	K	Control	ControlB
6	7.8.2020	7	0	6	0	B	K	Control	ControlB
7	7.8.2020	7	0	6	0	B	K	Control	ControlB
8	7.8.2020	7	0	7	0	B	K	Control	ControlB
9	7.8.2020	7	0	7	0	B	K	Control	ControlB
10	7.8.2020	7	0	7	0	B	K	Control	ControlB
11	7.8.2020	7	0	7	0	B	K	Control	ControlB
12	7.8.2020	7	0	7	0	B	K	Control	ControlB
13	7.8.2020	7	0	7	0	B	K	Control	ControlB
14	7.8.2020	7	0	7	0	B	K	Control	ControlB
15	7.8.2020	7	0	7	0	B	K	Control	ControlB
16	7.8.2020	7	0	7	0	B	K	Control	ControlB
17	7.8.2020	7	0	7	0	B	K	Control	ControlB
18	7.8.2020	7	0	7	0	B	K	Control	ControlB
19	7.8.2020	7	0	7	0	B	K	Control	ControlB
20	7.8.2020	7	0	7	0	B	K	Control	ControlB
1	7.8.2020	6	1	6	1	C	K	Control	ControlC
2	7.8.2020	7	0	4	0	C	K	Control	ControlC
3	7.8.2020	7	0	5	0	C	K	Control	ControlC
4	7.8.2020	7	0	5	0	C	K	Control	ControlC
5	7.8.2020	7	0	5	0	C	K	Control	ControlC
6	7.8.2020	7	0	5	0	C	K	Control	ControlC
7	7.8.2020	7	0	7	0	C	K	Control	ControlC
8	7.8.2020	7	0	6	0	C	K	Control	ControlC
9	7.8.2020	7	0	6	0	C	K	Control	ControlC
10	7.8.2020	7	0	6	0	C	K	Control	ControlC
11	7.8.2020	7	0	7	0	C	K	Control	ControlC
12	7.8.2020	7	0	7	0	C	K	Control	ControlC
13	7.8.2020	7	0	7	0	C	K	Control	ControlC
14	7.8.2020	7	0	7	0	C	K	Control	ControlC
15	7.8.2020	7	0	7	0	C	K	Control	ControlC
16	7.8.2020	7	0	7	0	C	K	Control	ControlC
17	7.8.2020	7	0	7	0	C	K	Control	ControlC
18	7.8.2020	7	0	7	0	C	K	Control	ControlC
19	7.8.2020	7	0	7	0	C	K	Control	ControlC
20	7.8.2020	7	0	7	0	C	K	Control	ControlC
1	7.8.2020	7	0	4	0	D	K	Control	ControlD
2	7.8.2020	7	0	4	0	D	K	Control	ControlD
3	7.8.2020	7	0	5	0	D	K	Control	ControlD
4	7.8.2020	7	0	5	0	D	K	Control	ControlD
5	7.8.2020	7	0	5	0	D	K	Control	ControlD
6	7.8.2020	7	0	6	0	D	K	Control	ControlD
7	7.8.2020	7	0	7	0	D	K	Control	ControlD
8	7.8.2020	7	0	7	0	D	K	Control	ControlD
9	7.8.2020	7	0	7	0	D	K	Control	ControlD
10	7.8.2020	7	0	7	0	D	K	Control	ControlD
11	7.8.2020	7	0	7	0	D	K	Control	ControlD
12	7.8.2020	7	0	7	0	D	K	Control	ControlD
13	7.8.2020	7	0	7	0	D	K	Control	ControlD
14	7.8.2020	7	0	7	0	D	K	Control	ControlD
15	7.8.2020	7	0	7	0	D	K	Control	ControlD
16	7.8.2020	7	0	7	0	D	K	Control	ControlD
17	7.8.2020	7	0	7	0	D	K	Control	ControlD
18	7.8.2020	7	0	7	0	D	K	Control	ControlD
19	7.8.2020	7	0	7	0	D	K	Control	ControlD
20	7.8.2020	7	0	7	0	D	K	Control	ControlD
1	7.8.2020	2	1	2	1	A	K	High	H1
2	7.8.2020	2	1	2	1	A	K	High	H1
3	7.8.2020	2	1	2	1	A	K	High	H1
4	7.8.2020	4	1	4	1	A	K	High	H1
5	7.8.2020	4	1	4	1	A	K	High	H1
6	7.8.2020	6	1	6	1	A	K	High	H1
7	7.8.2020	6	1	6	1	A	K	High	H1
8	7.8.2020	7	1	7	1	A	K	High	H1
9	7.8.2020	7	1	7	1	A	K	High	H1
10	7.8.2020	7	0	5	0	A	K	High	H1
11	7.8.2020	7	0	7	0	A	K	High	H1
12	7.8.2020	7	0	7	0	A	K	High	H1
13	7.8.2020	7	0	7	0	A	K	High	H1
14	7.8.2020	7	0	7	0	A	K	High	H1
15	7.8.2020	7	0	7	0	A	K	High	H1
16	7.8.2020	7	0	7	0	A	K	High	H1
17	7.8.2020	7	0	7	0	A	K	High	H1
18	7.8.2020	7	0	7	0	A	K	High	H1
19	7.8.2020	7	0	7	0	A	K	High	H1
20	7.8.2020	7	0	7	0	A	K	High	H1
1	7.8.2020	1	1	1	1	A	K	High	H2
2	7.8.2020	1	1	1	1	A	K	High	H2
3	7.8.2020	1	1	1	1	A	K	High	H2
4	7.8.2020	2	1	2	1	A	K	High	H2
5	7.8.2020	3	1	3	1	A	K	High	H2
6	7.8.2020	4	1	4	1	A	K	High	H2
7	7.8.2020	4	1	4	1	A	K	High	H2
8	7.8.2020	5	1	5	1	A	K	High	H2
9	7.8.2020	5	1	5	1	A	K	High	H2
10	7.8.2020	6	1	6	1	A	K	High	H2
11	7.8.2020	6	1	6	1	A	K	High	H2
12	7.8.2020	7	0	7	0	A	K	High	H2
13	7.8.2020	7	0	7	0	A	K	High	H2
14	7.8.2020	7	0	7	0	A	K	High	H2
15	7.8.2020	7	0	7	0	A	K	High	H2
16	7.8.2020	7	0	7	0	A	K	High	H2
17	7.8.2020	7	0	7	0	A	K	High	H2
18	7.8.2020	7	0	7	0	A	K	High	H2
19	7.8.2020	7	0	7	0	A	K	High	H2
20	7.8.2020	7	0	7	0	A	K	High	H2
1	7.8.2020	1	1	1	1	A	K	High	H3
2	7.8.2020	2	1	2	1	A	K	High	H3
3	7.8.2020	2	1	2	1	A	K	High	H3
4	7.8.2020	3	1	3	1	A	K	High	H3
5	7.8.2020	4	1	4	1	A	K	High	H3
6	7.8.2020	4	1	4	1	A	K	High	H3
7	7.8.2020	5	1	5	1	A	K	High	H3
8	7.8.2020	7	1	7	1	A	K	High	H3
9	7.8.2020	7	1	7	1	A	K	High	H3
10	7.8.2020	7	1	7	1	A	K	High	H3
11	7.8.2020	7	0	7	0	A	K	High	H3
12	7.8.2020	7	0	7	0	A	K	High	H3
13	7.8.2020	7	0	7	0	A	K	High	H3
14	7.8.2020	7	0	7	0	A	K	High	H3
15	7.8.2020	7	0	7	0	A	K	High	H3
16	7.8.2020	7	0	7	0	A	K	High	H3
17	7.8.2020	7	0	7	0	A	K	High	H3
18	7.8.2020	7	0	7	0	A	K	High	H3
19	7.8.2020	7	0	7	0	A	K	High	H3
20	7.8.2020	7	0	7	0	A	K	High	H3
1	7.8.2020	1	1	1	1	A	K	High	H4
2	7.8.2020	1	1	1	1	A	K	High	H4
3	7.8.2020	2	1	2	1	A	K	High	H4
4	7.8.2020	3	1	3	1	A	K	High	H4
5	7.8.2020	4	1	4	1	A	K	High	H4
6	7.8.2020	4	1	4	1	A	K	High	H4
7	7.8.2020	4	1	4	1	A	K	High	H4
8	7.8.2020	5	1	5	1	A	K	High	H4
9	7.8.2020	5	1	5	1	A	K	High	H4
10	7.8.2020	6	1	6	1	A	K	High	H4
11	7.8.2020	6	1	6	1	A	K	High	H4
12	7.8.2020	7	1	7	1	A	K	High	H4
13	7.8.2020	7	1	7	1	A	K	High	H4
14	7.8.2020	7	1	7	1	A	K	High	H4
15	7.8.2020	7	1	7	1	A	K	High	H4
16	7.8.2020	7	1	7	1	A	K	High	H4
17	7.8.2020	7	0	7	0	A	K	High	H4
18	7.8.2020	7	0	7	0	A	K	High	H4
19	7.8.2020	7	0	7	0	A	K	High	H4
20	7.8.2020	7	0	7	0	A	K	High	H4
1	7.8.2020	1	1	1	1	A	K	High	H5
2	7.8.2020	3	1	3	1	A	K	High	H5
3	7.8.2020	3	1	3	1	A	K	High	H5
4	7.8.2020	4	1	4	1	A	K	High	H5
5	7.8.2020	4	1	4	1	A	K	High	H5
6	7.8.2020	5	1	5	1	A	K	High	H5
7	7.8.2020	6	1	6	1	A	K	High	H5
8	7.8.2020	6	1	6	1	A	K	High	H5
9	7.8.2020	7	1	7	1	A	K	High	H5
10	7.8.2020	7	1	7	1	A	K	High	H5
11	7.8.2020	7	1	7	1	A	K	High	H5
12	7.8.2020	7	1	7	1	A	K	High	H5
13	7.8.2020	7	0	7	0	A	K	High	H5
14	7.8.2020	7	0	7	0	A	K	High	H5
15	7.8.2020	7	0	7	0	A	K	High	H5
16	7.8.2020	7	0	7	0	A	K	High	H5
17	7.8.2020	7	0	7	0	A	K	High	H5
18	7.8.2020	7	0	7	0	A	K	High	H5
19	7.8.2020	7	0	7	0	A	K	High	H5
20	7.8.2020	7	0	7	0	A	K	High	H5
1	7.8.2020	1	1	1	1	A	K	High	H6
2	7.8.2020	1	1	1	1	A	K	High	H6
3	7.8.2020	1	1	1	1	A	K	High	H6
4	7.8.2020	4	1	4	1	A	K	High	H6
5	7.8.2020	4	1	4	1	A	K	High	H6
6	7.8.2020	4	1	4	1	A	K	High	H6
7	7.8.2020	5	1	5	1	A	K	High	H6
8	7.8.2020	5	1	5	1	A	K	High	H6
9	7.8.2020	5	1	5	1	A	K	High	H6
10	7.8.2020	5	1	5	1	A	K	High	H6
11	7.8.2020	5	1	5	1	A	K	High	H6
12	7.8.2020	5	1	5	1	A	K	High	H6
13	7.8.2020	6	1	6	1	A	K	High	H6
14	7.8.2020	6	1	6	1	A	K	High	H6
15	7.8.2020	7	1	7	1	A	K	High	H6
16	7.8.2020	7	1	7	1	A	K	High	H6
17	7.8.2020	7	0	7	0	A	K	High	H6
18	7.8.2020	7	0	7	0	A	K	High	H6
19	7.8.2020	7	0	7	0	A	K	High	H6
20	7.8.2020	7	0	7	0	A	K	High	H6
1	7.8.2020	2	1	2	1	A	K	Low	L1
2	7.8.2020	4	1	4	1	A	K	Low	L1
3	7.8.2020	4	1	4	1	A	K	Low	L1
4	7.8.2020	5	1	5	1	A	K	Low	L1
5	7.8.2020	5	1	5	1	A	K	Low	L1
6	7.8.2020	6	1	6	1	A	K	Low	L1
7	7.8.2020	6	1	6	1	A	K	Low	L1
8	7.8.2020	6	1	6	1	A	K	Low	L1
9	7.8.2020	7	1	7	1	A	K	Low	L1
10	7.8.2020	7	1	7	1	A	K	Low	L1
11	7.8.2020	7	1	7	1	A	K	Low	L1
12	7.8.2020	7	0	6	0	A	K	Low	L1
13	7.8.2020	7	0	6	0	A	K	Low	L1
14	7.8.2020	7	0	7	0	A	K	Low	L1
15	7.8.2020	7	0	7	0	A	K	Low	L1
16	7.8.2020	7	0	7	0	A	K	Low	L1
17	7.8.2020	7	0	7	0	A	K	Low	L1
18	7.8.2020	7	0	7	0	A	K	Low	L1
19	7.8.2020	7	0	7	0	A	K	Low	L1
20	7.8.2020	7	0	7	0	A	K	Low	L1
1	7.8.2020	3	1	3	1	A	K	Low	L2
2	7.8.2020	5	1	5	1	A	K	Low	L2
3	7.8.2020	6	1	6	1	A	K	Low	L2
4	7.8.2020	6	1	6	1	A	K	Low	L2
5	7.8.2020	7	1	7	1	A	K	Low	L2
6	7.8.2020	7	0	7	0	A	K	Low	L2
7	7.8.2020	7	0	7	0	A	K	Low	L2
8	7.8.2020	7	0	7	0	A	K	Low	L2
9	7.8.2020	7	0	7	0	A	K	Low	L2
10	7.8.2020	7	0	7	0	A	K	Low	L2
11	7.8.2020	7	0	7	0	A	K	Low	L2
12	7.8.2020	7	0	7	0	A	K	Low	L2
13	7.8.2020	7	0	7	0	A	K	Low	L2
14	7.8.2020	7	0	7	0	A	K	Low	L2
15	7.8.2020	7	0	7	0	A	K	Low	L2
16	7.8.2020	7	0	7	0	A	K	Low	L2
17	7.8.2020	7	0	7	0	A	K	Low	L2
18	7.8.2020	7	0	7	0	A	K	Low	L2
19	7.8.2020	7	0	7	0	A	K	Low	L2
20	7.8.2020	7	0	7	0	A	K	Low	L2
1	7.8.2020	2	1	2	1	A	K	Low	L3
2	7.8.2020	5	1	5	1	A	K	Low	L3
3	7.8.2020	5	1	5	1	A	K	Low	L3
4	7.8.2020	5	1	5	1	A	K	Low	L3
5	7.8.2020	6	1	6	1	A	K	Low	L3
6	7.8.2020	6	1	6	1	A	K	Low	L3
7	7.8.2020	6	1	6	1	A	K	Low	L3
8	7.8.2020	6	1	6	1	A	K	Low	L3
9	7.8.2020	7	1	7	1	A	K	Low	L3
10	7.8.2020	7	1	7	1	A	K	Low	L3
11	7.8.2020	7	0	7	0	A	K	Low	L3
12	7.8.2020	7	0	7	0	A	K	Low	L3
13	7.8.2020	7	0	7	0	A	K	Low	L3
14	7.8.2020	7	0	7	0	A	K	Low	L3
15	7.8.2020	7	0	7	0	A	K	Low	L3
16	7.8.2020	7	0	7	0	A	K	Low	L3
17	7.8.2020	7	0	7	0	A	K	Low	L3
18	7.8.2020	7	0	7	0	A	K	Low	L3
19	7.8.2020	7	0	7	0	A	K	Low	L3
20	7.8.2020	7	0	7	0	A	K	Low	L3
1	7.8.2020	1	1	1	1	A	K	Low	L4
2	7.8.2020	2	1	2	1	A	K	Low	L4
3	7.8.2020	3	1	3	1	A	K	Low	L4
4	7.8.2020	3	1	3	1	A	K	Low	L4
5	7.8.2020	3	1	3	1	A	K	Low	L4
6	7.8.2020	5	1	5	1	A	K	Low	L4
7	7.8.2020	5	1	5	1	A	K	Low	L4
8	7.8.2020	5	1	5	1	A	K	Low	L4
9	7.8.2020	6	1	6	1	A	K	Low	L4
10	7.8.2020	6	1	6	1	A	K	Low	L4
11	7.8.2020	7	1	7	1	A	K	Low	L4
12	7.8.2020	7	1	7	1	A	K	Low	L4
13	7.8.2020	7	1	7	1	A	K	Low	L4
14	7.8.2020	7	0	7	0	A	K	Low	L4
15	7.8.2020	7	0	7	0	A	K	Low	L4
16	7.8.2020	7	0	7	0	A	K	Low	L4
17	7.8.2020	7	0	7	0	A	K	Low	L4
18	7.8.2020	7	0	7	0	A	K	Low	L4
19	7.8.2020	7	0	7	0	A	K	Low	L4
20	7.8.2020	7	0	7	0	A	K	Low	L4
1	7.8.2020	2	1	2	1	A	K	Low	L5
2	7.8.2020	4	1	4	1	A	K	Low	L5
3	7.8.2020	4	1	4	1	A	K	Low	L5
4	7.8.2020	5	1	5	1	A	K	Low	L5
5	7.8.2020	5	1	5	1	A	K	Low	L5
6	7.8.2020	5	1	5	1	A	K	Low	L5
7	7.8.2020	6	1	6	1	A	K	Low	L5
8	7.8.2020	6	1	6	1	A	K	Low	L5
9	7.8.2020	6	1	6	1	A	K	Low	L5
10	7.8.2020	7	1	7	1	A	K	Low	L5
11	7.8.2020	7	0	7	0	A	K	Low	L5
12	7.8.2020	7	0	7	0	A	K	Low	L5
13	7.8.2020	7	0	7	0	A	K	Low	L5
14	7.8.2020	7	0	7	0	A	K	Low	L5
15	7.8.2020	7	0	7	0	A	K	Low	L5
16	7.8.2020	7	0	7	0	A	K	Low	L5
17	7.8.2020	7	0	7	0	A	K	Low	L5
18	7.8.2020	7	0	7	0	A	K	Low	L5
19	7.8.2020	7	0	7	0	A	K	Low	L5
20	7.8.2020	7	0	7	0	A	K	Low	L5
1	7.8.2020	1	1	1	1	A	K	Low	L6
2	7.8.2020	2	1	2	1	A	K	Low	L6
3	7.8.2020	4	1	4	1	A	K	Low	L6
4	7.8.2020	5	1	5	1	A	K	Low	L6
5	7.8.2020	5	1	5	1	A	K	Low	L6
6	7.8.2020	6	1	6	1	A	K	Low	L6
7	7.8.2020	6	1	6	1	A	K	Low	L6
8	7.8.2020	7	1	7	1	A	K	Low	L6
9	7.8.2020	7	1	7	1	A	K	Low	L6
10	7.8.2020	7	1	7	1	A	K	Low	L6
11	7.8.2020	7	0	7	0	A	K	Low	L6
12	7.8.2020	7	0	7	0	A	K	Low	L6
13	7.8.2020	7	0	7	0	A	K	Low	L6
14	7.8.2020	7	0	7	0	A	K	Low	L6
15	7.8.2020	7	0	7	0	A	K	Low	L6
16	7.8.2020	7	0	7	0	A	K	Low	L6
17	7.8.2020	7	0	7	0	A	K	Low	L6
18	7.8.2020	7	0	7	0	A	K	Low	L6
19	7.8.2020	7	0	7	0	A	K	Low	L6
20	7.8.2020	7	0	7	0	A	K	Low	L6
1	9.24.2020	7	0	5	0	A	L	Control	ControlA
2	9.24.2020	7	0	6	0	A	L	Control	ControlA
3	9.24.2020	7	0	6	0	A	L	Control	ControlA
4	9.24.2020	7	0	7	0	A	L	Control	ControlA
5	9.24.2020	7	0	7	0	A	L	Control	ControlA
6	9.24.2020	7	0	7	0	A	L	Control	ControlA
7	9.24.2020	7	0	7	0	A	L	Control	ControlA
8	9.24.2020	7	0	7	0	A	L	Control	ControlA
9	9.24.2020	7	0	7	0	A	L	Control	ControlA
10	9.24.2020	7	0	7	0	A	L	Control	ControlA
11	9.24.2020	7	0	7	0	A	L	Control	ControlA
12	9.24.2020	7	0	7	0	A	L	Control	ControlA
13	9.24.2020	7	0	7	0	A	L	Control	ControlA
14	9.24.2020	7	0	7	0	A	L	Control	ControlA
15	9.24.2020	7	0	7	0	A	L	Control	ControlA
16	9.24.2020	7	0	7	0	A	L	Control	ControlA
17	9.24.2020	7	0	7	0	A	L	Control	ControlA
18	9.24.2020	7	0	7	0	A	L	Control	ControlA
19	9.24.2020	7	0	7	0	A	L	Control	ControlA
20	9.24.2020	7	0	7	0	A	L	Control	ControlA
1	9.24.2020	1	1	1	1	B	L	Control	ControlB
2	9.24.2020	7	0	4	0	B	L	Control	ControlB
3	9.24.2020	7	0	5	0	B	L	Control	ControlB
4	9.24.2020	7	0	5	0	B	L	Control	ControlB
5	9.24.2020	7	0	6	0	B	L	Control	ControlB
6	9.24.2020	7	0	6	0	B	L	Control	ControlB
7	9.24.2020	7	0	6	0	B	L	Control	ControlB
8	9.24.2020	7	0	7	0	B	L	Control	ControlB
9	9.24.2020	7	0	7	0	B	L	Control	ControlB
10	9.24.2020	7	0	7	0	B	L	Control	ControlB
11	9.24.2020	7	0	7	0	B	L	Control	ControlB
12	9.24.2020	7	0	7	0	B	L	Control	ControlB
13	9.24.2020	7	0	7	0	B	L	Control	ControlB
14	9.24.2020	7	0	7	0	B	L	Control	ControlB
15	9.24.2020	7	0	7	0	B	L	Control	ControlB
16	9.24.2020	7	0	7	0	B	L	Control	ControlB
17	9.24.2020	7	0	7	0	B	L	Control	ControlB
18	9.24.2020	7	0	7	0	B	L	Control	ControlB
19	9.24.2020	7	0	7	0	B	L	Control	ControlB
20	9.24.2020	7	0	7	0	B	L	Control	ControlB
1	9.25.2020	7	1	7	1	C	L	Control	ControlC
2	9.25.2020	7	0	2	0	C	L	Control	ControlC
3	9.25.2020	7	0	3	0	C	L	Control	ControlC
4	9.25.2020	7	0	4	0	C	L	Control	ControlC
5	9.25.2020	7	0	4	0	C	L	Control	ControlC
6	9.25.2020	7	0	4	0	C	L	Control	ControlC
7	9.25.2020	7	0	4	0	C	L	Control	ControlC
8	9.25.2020	7	0	5	0	C	L	Control	ControlC
9	9.25.2020	7	0	5	0	C	L	Control	ControlC
10	9.25.2020	7	0	5	0	C	L	Control	ControlC
11	9.25.2020	7	0	5	0	C	L	Control	ControlC
12	9.25.2020	7	0	7	0	C	L	Control	ControlC
13	9.25.2020	7	0	7	0	C	L	Control	ControlC
14	9.25.2020	7	0	7	0	C	L	Control	ControlC
15	9.25.2020	7	0	7	0	C	L	Control	ControlC
16	9.25.2020	7	0	7	0	C	L	Control	ControlC
17	9.25.2020	7	0	7	0	C	L	Control	ControlC
18	9.25.2020	7	0	7	0	C	L	Control	ControlC
19	9.25.2020	7	0	7	0	C	L	Control	ControlC
20	9.25.2020	7	0	7	0	C	L	Control	ControlC
1	9.25.2020	7	0	7	0	D	L	Control	ControlD
2	9.25.2020	1	1	1	1	D	L	Control	ControlD
3	9.25.2020	1	1	1	1	D	L	Control	ControlD
4	9.25.2020	6	1	6	1	D	L	Control	ControlD
5	9.25.2020	7	1	7	1	D	L	Control	ControlD
6	9.25.2020	7	0	4	0	D	L	Control	ControlD
7	9.25.2020	7	0	4	0	D	L	Control	ControlD
8	9.25.2020	7	0	4	0	D	L	Control	ControlD
9	9.25.2020	7	0	4	0	D	L	Control	ControlD
10	9.25.2020	7	0	5	0	D	L	Control	ControlD
11	9.25.2020	7	0	5	0	D	L	Control	ControlD
12	9.25.2020	7	0	5	0	D	L	Control	ControlD
13	9.25.2020	7	0	7	0	D	L	Control	ControlD
14	9.25.2020	7	0	7	0	D	L	Control	ControlD
15	9.25.2020	7	0	7	0	D	L	Control	ControlD
16	9.25.2020	7	0	7	0	D	L	Control	ControlD
17	9.25.2020	7	0	7	0	D	L	Control	ControlD
18	9.25.2020	7	0	7	0	D	L	Control	ControlD
19	9.25.2020	7	0	7	0	D	L	Control	ControlD
20	9.25.2020	7	0	7	0	D	L	Control	ControlD
1	9.25.2020	1	1	1	1	A	L	High	H1
2	9.25.2020	1	1	1	1	A	L	High	H1
3	9.25.2020	2	1	2	1	A	L	High	H1
4	9.25.2020	2	1	2	1	A	L	High	H1
5	9.25.2020	2	1	2	1	A	L	High	H1
6	9.25.2020	2	1	2	1	A	L	High	H1
7	9.25.2020	2	1	2	1	A	L	High	H1
8	9.25.2020	4	1	4	1	A	L	High	H1
9	9.25.2020	5	1	5	1	A	L	High	H1
10	9.25.2020	6	1	6	1	A	L	High	H1
11	9.25.2020	6	1	6	1	A	L	High	H1
12	9.25.2020	7	0	4	0	A	L	High	H1
13	9.25.2020	7	0	7	0	A	L	High	H1
14	9.25.2020	7	0	7	0	A	L	High	H1
15	9.25.2020	7	0	7	0	A	L	High	H1
16	9.25.2020	7	0	7	0	A	L	High	H1
17	9.25.2020	7	0	7	0	A	L	High	H1
18	9.25.2020	7	0	7	0	A	L	High	H1
19	9.25.2020	7	0	7	0	A	L	High	H1
20	9.25.2020	7	0	7	0	A	L	High	H1
1	9.25.2020	1	1	1	1	B	L	High	H1
2	9.25.2020	1	1	1	1	B	L	High	H1
3	9.25.2020	2	1	2	1	B	L	High	H1
4	9.25.2020	2	1	2	1	B	L	High	H1
5	9.25.2020	3	1	3	1	B	L	High	H1
6	9.25.2020	3	1	3	1	B	L	High	H1
7	9.25.2020	5	1	5	1	B	L	High	H1
8	9.25.2020	7	1	7	1	B	L	High	H1
9	9.25.2020	7	1	7	1	B	L	High	H1
10	9.25.2020	7	0	7	0	B	L	High	H1
11	9.25.2020	7	0	7	0	B	L	High	H1
12	9.25.2020	7	0	7	0	B	L	High	H1
13	9.25.2020	7	0	7	0	B	L	High	H1
14	9.25.2020	7	0	7	0	B	L	High	H1
15	9.25.2020	7	0	7	0	B	L	High	H1
16	9.25.2020	7	0	7	0	B	L	High	H1
17	9.25.2020	7	0	7	0	B	L	High	H1
18	9.25.2020	7	0	7	0	B	L	High	H1
19	9.25.2020	7	0	7	0	B	L	High	H1
20	9.25.2020	7	0	7	0	B	L	High	H1
1	9.25.2020	1	1	1	1	A	L	High	H2
2	9.25.2020	3	1	3	1	A	L	High	H2
3	9.25.2020	5	1	5	1	A	L	High	H2
4	9.25.2020	6	1	6	1	A	L	High	H2
5	9.25.2020	6	1	6	1	A	L	High	H2
6	9.25.2020	7	1	7	1	A	L	High	H2
7	9.25.2020	7	1	7	1	A	L	High	H2
8	9.25.2020	7	1	7	1	A	L	High	H2
9	9.25.2020	7	0	5	0	A	L	High	H2
10	9.25.2020	7	0	7	0	A	L	High	H2
11	9.25.2020	7	0	7	0	A	L	High	H2
12	9.25.2020	7	0	7	0	A	L	High	H2
13	9.25.2020	7	0	7	0	A	L	High	H2
14	9.25.2020	7	0	7	0	A	L	High	H2
15	9.25.2020	7	0	7	0	A	L	High	H2
16	9.25.2020	7	0	7	0	A	L	High	H2
17	9.25.2020	7	0	7	0	A	L	High	H2
18	9.25.2020	7	0	7	0	A	L	High	H2
19	9.25.2020	7	0	7	0	A	L	High	H2
20	9.25.2020	7	0	7	0	A	L	High	H2
1	9.25.2020	1	1	1	1	B	L	High	H2
2	9.25.2020	5	1	5	1	B	L	High	H2
3	9.25.2020	5	1	5	1	B	L	High	H2
4	9.25.2020	6	1	6	1	B	L	High	H2
5	9.25.2020	6	1	6	1	B	L	High	H2
6	9.25.2020	6	1	6	1	B	L	High	H2
7	9.25.2020	7	1	7	1	B	L	High	H2
8	9.25.2020	7	0	7	0	B	L	High	H2
9	9.25.2020	7	0	7	0	B	L	High	H2
10	9.25.2020	7	0	7	0	B	L	High	H2
11	9.25.2020	7	0	7	0	B	L	High	H2
12	9.25.2020	7	0	7	0	B	L	High	H2
13	9.25.2020	7	0	7	0	B	L	High	H2
14	9.25.2020	7	0	7	0	B	L	High	H2
15	9.25.2020	7	0	7	0	B	L	High	H2
16	9.25.2020	7	0	7	0	B	L	High	H2
17	9.25.2020	7	0	7	0	B	L	High	H2
18	9.25.2020	7	0	7	0	B	L	High	H2
19	9.25.2020	7	0	7	0	B	L	High	H2
20	9.25.2020	7	0	7	0	B	L	High	H2
1	9.24.2020	1	1	1	1	A	L	High	H3
2	9.24.2020	1	1	1	1	A	L	High	H3
3	9.24.2020	1	1	1	1	A	L	High	H3
4	9.24.2020	1	1	1	1	A	L	High	H3
5	9.24.2020	1	1	1	1	A	L	High	H3
6	9.24.2020	1	1	1	1	A	L	High	H3
7	9.24.2020	2	1	2	1	A	L	High	H3
8	9.24.2020	2	1	2	1	A	L	High	H3
9	9.24.2020	2	1	2	1	A	L	High	H3
10	9.24.2020	2	1	2	1	A	L	High	H3
11	9.24.2020	3	1	3	1	A	L	High	H3
12	9.24.2020	5	1	5	1	A	L	High	H3
13	9.24.2020	6	1	6	1	A	L	High	H3
14	9.24.2020	7	1	7	1	A	L	High	H3
15	9.24.2020	7	0	7	0	A	L	High	H3
16	9.24.2020	7	0	7	0	A	L	High	H3
17	9.24.2020	7	0	7	0	A	L	High	H3
18	9.24.2020	7	0	7	0	A	L	High	H3
19	9.24.2020	7	0	7	0	A	L	High	H3
20	9.24.2020	7	0	7	0	A	L	High	H3
1	9.24.2020	1	1	1	1	B	L	High	H3
2	9.24.2020	1	1	1	1	B	L	High	H3
3	9.24.2020	2	1	2	1	B	L	High	H3
4	9.24.2020	2	1	2	1	B	L	High	H3
5	9.24.2020	2	1	2	1	B	L	High	H3
6	9.24.2020	3	1	3	1	B	L	High	H3
7	9.24.2020	3	1	3	1	B	L	High	H3
8	9.24.2020	6	1	6	1	B	L	High	H3
9	9.24.2020	6	0	6	0	B	L	High	H3
10	9.24.2020	7	1	7	1	B	L	High	H3
11	9.24.2020	7	1	7	1	B	L	High	H3
12	9.24.2020	7	0	5	0	B	L	High	H3
13	9.24.2020	7	0	7	0	B	L	High	H3
14	9.24.2020	7	0	7	0	B	L	High	H3
15	9.24.2020	7	0	7	0	B	L	High	H3
16	9.24.2020	7	0	7	0	B	L	High	H3
17	9.24.2020	7	0	7	0	B	L	High	H3
18	9.24.2020	7	0	7	0	B	L	High	H3
19	9.24.2020	7	0	7	0	B	L	High	H3
20	9.24.2020	7	0	7	0	B	L	High	H3
1	9.25.2020	1	1	1	1	A	L	High	H4
2	9.25.2020	1	1	1	1	A	L	High	H4
3	9.25.2020	1	1	1	1	A	L	High	H4
4	9.25.2020	2	1	2	1	A	L	High	H4
5	9.25.2020	2	1	2	1	A	L	High	H4
6	9.25.2020	3	1	3	1	A	L	High	H4
7	9.25.2020	3	1	3	1	A	L	High	H4
8	9.25.2020	3	1	3	1	A	L	High	H4
9	9.25.2020	4	1	4	1	A	L	High	H4
10	9.25.2020	5	1	5	1	A	L	High	H4
11	9.25.2020	5	1	5	1	A	L	High	H4
12	9.25.2020	6	1	6	1	A	L	High	H4
13	9.25.2020	6	1	6	1	A	L	High	H4
14	9.25.2020	7	0	7	0	A	L	High	H4
15	9.25.2020	7	0	7	0	A	L	High	H4
16	9.25.2020	7	0	7	0	A	L	High	H4
17	9.25.2020	7	0	7	0	A	L	High	H4
18	9.25.2020	7	0	7	0	A	L	High	H4
19	9.25.2020	7	0	7	0	A	L	High	H4
20	9.25.2020	7	0	7	0	A	L	High	H4
1	9.25.2020	2	1	2	1	B	L	High	H4
2	9.25.2020	4	1	4	1	B	L	High	H4
3	9.25.2020	4	1	4	1	B	L	High	H4
4	9.25.2020	5	1	5	1	B	L	High	H4
5	9.25.2020	5	1	5	1	B	L	High	H4
6	9.25.2020	6	1	6	1	B	L	High	H4
7	9.25.2020	7	1	7	1	B	L	High	H4
8	9.25.2020	7	1	7	1	B	L	High	H4
9	9.25.2020	7	0	7	0	B	L	High	H4
10	9.25.2020	7	0	7	0	B	L	High	H4
11	9.25.2020	7	0	7	0	B	L	High	H4
12	9.25.2020	7	0	7	0	B	L	High	H4
13	9.25.2020	7	0	7	0	B	L	High	H4
14	9.25.2020	7	0	7	0	B	L	High	H4
15	9.25.2020	7	0	7	0	B	L	High	H4
16	9.25.2020	7	0	7	0	B	L	High	H4
17	9.25.2020	7	0	7	0	B	L	High	H4
18	9.25.2020	7	0	7	0	B	L	High	H4
19	9.25.2020	7	0	7	0	B	L	High	H4
20	9.25.2020	7	0	7	0	B	L	High	H4
1	9.24.2020	1	1	1	1	A	L	High	H5
2	9.24.2020	1	1	1	1	A	L	High	H5
3	9.24.2020	2	1	2	1	A	L	High	H5
4	9.24.2020	2	1	2	1	A	L	High	H5
5	9.24.2020	2	1	2	1	A	L	High	H5
6	9.24.2020	2	1	2	1	A	L	High	H5
7	9.24.2020	2	1	2	1	A	L	High	H5
8	9.24.2020	2	1	2	1	A	L	High	H5
9	9.24.2020	4	1	4	1	A	L	High	H5
10	9.24.2020	4	1	4	1	A	L	High	H5
11	9.24.2020	5	1	5	1	A	L	High	H5
12	9.24.2020	6	1	6	1	A	L	High	H5
13	9.24.2020	7	0	7	0	A	L	High	H5
14	9.24.2020	7	0	7	0	A	L	High	H5
15	9.24.2020	7	0	7	0	A	L	High	H5
16	9.24.2020	7	0	7	0	A	L	High	H5
17	9.24.2020	7	0	7	0	A	L	High	H5
18	9.24.2020	7	0	7	0	A	L	High	H5
19	9.24.2020	7	0	7	0	A	L	High	H5
20	9.24.2020	7	0	7	0	A	L	High	H5
1	9.24.2020	1	1	1	1	B	L	High	H5
2	9.24.2020	1	1	1	1	B	L	High	H5
3	9.24.2020	1	1	1	1	B	L	High	H5
4	9.24.2020	1	1	1	1	B	L	High	H5
5	9.24.2020	1	1	1	1	B	L	High	H5
6	9.24.2020	2	1	2	1	B	L	High	H5
7	9.24.2020	2	1	2	1	B	L	High	H5
8	9.24.2020	2	1	2	1	B	L	High	H5
9	9.24.2020	2	1	2	1	B	L	High	H5
10	9.24.2020	3	1	3	1	B	L	High	H5
11	9.24.2020	3	1	3	1	B	L	High	H5
12	9.24.2020	4	1	4	1	B	L	High	H5
13	9.24.2020	7	1	7	1	B	L	High	H5
14	9.24.2020	7	1	7	1	B	L	High	H5
15	9.24.2020	7	0	7	0	B	L	High	H5
16	9.24.2020	7	0	7	0	B	L	High	H5
17	9.24.2020	7	0	7	0	B	L	High	H5
18	9.24.2020	7	0	7	0	B	L	High	H5
19	9.24.2020	7	0	7	0	B	L	High	H5
20	9.24.2020	7	0	7	0	B	L	High	H5
1	9.24.2020	1	1	1	1	A	L	High	H6
2	9.24.2020	1	1	1	1	A	L	High	H6
3	9.24.2020	1	1	1	1	A	L	High	H6
4	9.24.2020	1	1	1	1	A	L	High	H6
5	9.24.2020	2	1	2	1	A	L	High	H6
6	9.24.2020	2	1	2	1	A	L	High	H6
7	9.24.2020	2	1	2	1	A	L	High	H6
8	9.24.2020	2	1	2	1	A	L	High	H6
9	9.24.2020	2	1	2	1	A	L	High	H6
10	9.24.2020	2	1	2	1	A	L	High	H6
11	9.24.2020	3	1	3	1	A	L	High	H6
12	9.24.2020	4	1	4	1	A	L	High	H6
13	9.24.2020	4	1	4	1	A	L	High	H6
14	9.24.2020	5	1	5	1	A	L	High	H6
15	9.24.2020	6	1	6	1	A	L	High	H6
16	9.24.2020	7	1	7	1	A	L	High	H6
17	9.24.2020	7	0	7	0	A	L	High	H6
18	9.24.2020	7	0	7	0	A	L	High	H6
19	9.24.2020	7	0	7	0	A	L	High	H6
20	9.24.2020	7	0	7	0	A	L	High	H6
1	9.24.2020	1	0	1	0	B	L	High	H6
2	9.24.2020	1	0	1	0	B	L	High	H6
3	9.24.2020	1	0	1	0	B	L	High	H6
4	9.24.2020	1	0	1	0	B	L	High	H6
5	9.24.2020	1	0	1	0	B	L	High	H6
6	9.24.2020	2	0	2	0	B	L	High	H6
7	9.24.2020	7	0	7	0	B	L	High	H6
8	9.24.2020	2	0	2	0	B	L	High	H6
9	9.24.2020	2	0	2	0	B	L	High	H6
10	9.24.2020	2	0	2	0	B	L	High	H6
11	9.24.2020	3	0	3	0	B	L	High	H6
12	9.24.2020	3	0	3	0	B	L	High	H6
13	9.24.2020	4	0	4	0	B	L	High	H6
14	9.24.2020	4	0	4	0	B	L	High	H6
15	9.24.2020	7	0	7	0	B	L	High	H6
16	9.24.2020	7	0	7	0	B	L	High	H6
17	9.24.2020	7	0	7	0	B	L	High	H6
18	9.24.2020	7	0	7	0	B	L	High	H6
19	9.24.2020	7	0	7	0	B	L	High	H6
20	9.24.2020	7	0	7	0	B	L	High	H6
1	9.25.2020	1	1	1	1	A	L	Low	L1
2	9.25.2020	1	1	1	1	A	L	Low	L1
3	9.25.2020	1	1	1	1	A	L	Low	L1
4	9.25.2020	2	1	2	1	A	L	Low	L1
5	9.25.2020	3	1	3	1	A	L	Low	L1
6	9.25.2020	3	1	3	1	A	L	Low	L1
7	9.25.2020	3	1	3	1	A	L	Low	L1
8	9.25.2020	4	1	4	1	A	L	Low	L1
9	9.25.2020	6	1	6	1	A	L	Low	L1
10	9.25.2020	6	1	6	1	A	L	Low	L1
11	9.25.2020	6	1	6	1	A	L	Low	L1
12	9.25.2020	7	1	7	1	A	L	Low	L1
13	9.25.2020	7	1	7	1	A	L	Low	L1
14	9.25.2020	6	0	6	0	A	L	Low	L1
15	9.25.2020	7	0	7	0	A	L	Low	L1
16	9.25.2020	7	0	7	0	A	L	Low	L1
17	9.25.2020	7	0	7	0	A	L	Low	L1
18	9.25.2020	7	0	7	0	A	L	Low	L1
19	9.25.2020	7	0	7	0	A	L	Low	L1
20	9.25.2020	7	0	7	0	A	L	Low	L1
1	9.25.2020	7	0	7	0	B	L	Low	L1
2	9.25.2020	7	0	7	0	B	L	Low	L1
3	9.25.2020	7	0	7	0	B	L	Low	L1
4	9.25.2020	7	0	7	0	B	L	Low	L1
5	9.25.2020	7	0	7	0	B	L	Low	L1
6	9.25.2020	7	0	7	0	B	L	Low	L1
7	9.25.2020	7	0	7	0	B	L	Low	L1
8	9.25.2020	7	0	7	0	B	L	Low	L1
9	9.25.2020	7	0	7	0	B	L	Low	L1
10	9.25.2020	7	0	7	0	B	L	Low	L1
11	9.25.2020	7	0	7	0	B	L	Low	L1
12	9.25.2020	7	0	7	0	B	L	Low	L1
13	9.25.2020	7	0	7	0	B	L	Low	L1
14	9.25.2020	7	0	7	0	B	L	Low	L1
15	9.25.2020	7	0	7	0	B	L	Low	L1
16	9.25.2020	7	0	7	0	B	L	Low	L1
17	9.25.2020	7	0	7	0	B	L	Low	L1
18	9.25.2020	7	0	7	0	B	L	Low	L1
19	9.25.2020	7	0	7	0	B	L	Low	L1
20	9.25.2020	7	0	7	0	B	L	Low	L1
1	9.24.2020	1	1	1	1	A	L	Low	L2
2	9.24.2020	1	1	1	1	A	L	Low	L2
3	9.24.2020	1	1	1	1	A	L	Low	L2
4	9.24.2020	2	1	2	1	A	L	Low	L2
5	9.24.2020	4	1	4	1	A	L	Low	L2
6	9.24.2020	4	1	4	1	A	L	Low	L2
7	9.24.2020	5	1	5	1	A	L	Low	L2
8	9.24.2020	6	1	6	1	A	L	Low	L2
9	9.24.2020	6	1	6	1	A	L	Low	L2
10	9.24.2020	6	1	6	1	A	L	Low	L2
11	9.24.2020	7	1	7	1	A	L	Low	L2
12	9.24.2020	7	1	7	1	A	L	Low	L2
13	9.24.2020	7	0	7	0	A	L	Low	L2
14	9.24.2020	7	0	7	0	A	L	Low	L2
15	9.24.2020	7	0	7	0	A	L	Low	L2
16	9.24.2020	7	0	7	0	A	L	Low	L2
17	9.24.2020	7	0	7	0	A	L	Low	L2
18	9.24.2020	7	0	7	0	A	L	Low	L2
19	9.24.2020	7	0	7	0	A	L	Low	L2
20	9.24.2020	7	0	7	0	A	L	Low	L2
1	9.24.2020	1	1	1	1	B	L	Low	L2
2	9.24.2020	1	1	1	1	B	L	Low	L2
3	9.24.2020	1	1	1	1	B	L	Low	L2
4	9.24.2020	1	1	1	1	B	L	Low	L2
5	9.24.2020	2	1	2	1	B	L	Low	L2
6	9.24.2020	2	1	2	1	B	L	Low	L2
7	9.24.2020	2	1	2	1	B	L	Low	L2
8	9.24.2020	2	1	2	1	B	L	Low	L2
9	9.24.2020	3	1	3	1	B	L	Low	L2
10	9.24.2020	3	1	3	1	B	L	Low	L2
11	9.24.2020	4	1	4	1	B	L	Low	L2
12	9.24.2020	4	1	4	1	B	L	Low	L2
13	9.24.2020	5	1	5	1	B	L	Low	L2
14	9.24.2020	5	1	5	1	B	L	Low	L2
15	9.24.2020	7	0	7	0	B	L	Low	L2
16	9.24.2020	7	0	7	0	B	L	Low	L2
17	9.24.2020	7	0	7	0	B	L	Low	L2
18	9.24.2020	7	0	7	0	B	L	Low	L2
19	9.24.2020	7	0	7	0	B	L	Low	L2
20	9.24.2020	7	0	7	0	B	L	Low	L2
1	9.24.2020	1	1	1	1	A	L	Low	L3
2	9.24.2020	1	1	1	1	A	L	Low	L3
3	9.24.2020	1	1	1	1	A	L	Low	L3
4	9.24.2020	1	1	1	1	A	L	Low	L3
5	9.24.2020	2	1	2	1	A	L	Low	L3
6	9.24.2020	2	1	2	1	A	L	Low	L3
7	9.24.2020	2	1	2	1	A	L	Low	L3
8	9.24.2020	2	1	2	1	A	L	Low	L3
9	9.24.2020	3	1	3	1	A	L	Low	L3
10	9.24.2020	3	1	3	1	A	L	Low	L3
11	9.24.2020	3	1	3	1	A	L	Low	L3
12	9.24.2020	4	1	4	1	A	L	Low	L3
13	9.24.2020	4	1	4	1	A	L	Low	L3
14	9.24.2020	4	1	4	1	A	L	Low	L3
15	9.24.2020	4	1	4	1	A	L	Low	L3
16	9.24.2020	6	1	6	1	A	L	Low	L3
17	9.24.2020	6	1	6	1	A	L	Low	L3
18	9.24.2020	7	1	7	1	A	L	Low	L3
19	9.24.2020	7	0	7	0	A	L	Low	L3
20	9.24.2020	7	0	7	0	A	L	Low	L3
1	9.24.2020	1	1	1	1	B	L	Low	L3
2	9.24.2020	2	1	2	1	B	L	Low	L3
3	9.24.2020	3	1	3	1	B	L	Low	L3
4	9.24.2020	3	1	3	1	B	L	Low	L3
5	9.24.2020	3	1	3	1	B	L	Low	L3
6	9.24.2020	3	1	3	1	B	L	Low	L3
7	9.24.2020	3	1	3	1	B	L	Low	L3
8	9.24.2020	4	1	4	1	B	L	Low	L3
9	9.24.2020	4	1	4	1	B	L	Low	L3
10	9.24.2020	5	1	5	1	B	L	Low	L3
11	9.24.2020	5	1	5	1	B	L	Low	L3
12	9.24.2020	6	1	6	1	B	L	Low	L3
13	9.24.2020	7	1	7	1	B	L	Low	L3
14	9.24.2020	7	1	7	1	B	L	Low	L3
15	9.24.2020	7	0	5	0	B	L	Low	L3
16	9.24.2020	7	0	7	0	B	L	Low	L3
17	9.24.2020	7	0	7	0	B	L	Low	L3
18	9.24.2020	7	0	7	0	B	L	Low	L3
19	9.24.2020	7	0	7	0	B	L	Low	L3
20	9.24.2020	7	0	7	0	B	L	Low	L3
1	9.24.2020	1	1	1	1	A	L	Low	L4
2	9.24.2020	1	1	1	1	A	L	Low	L4
3	9.24.2020	1	1	1	1	A	L	Low	L4
4	9.24.2020	2	1	2	1	A	L	Low	L4
5	9.24.2020	3	1	3	1	A	L	Low	L4
6	9.24.2020	3	1	3	1	A	L	Low	L4
7	9.24.2020	4	1	4	1	A	L	Low	L4
8	9.24.2020	6	1	6	1	A	L	Low	L4
9	9.24.2020	7	0	7	0	A	L	Low	L4
10	9.24.2020	7	0	7	0	A	L	Low	L4
11	9.24.2020	7	0	7	0	A	L	Low	L4
12	9.24.2020	7	0	7	0	A	L	Low	L4
13	9.24.2020	7	0	7	0	A	L	Low	L4
14	9.24.2020	7	0	7	0	A	L	Low	L4
15	9.24.2020	7	0	7	0	A	L	Low	L4
16	9.24.2020	7	0	7	0	A	L	Low	L4
17	9.24.2020	7	0	7	0	A	L	Low	L4
18	9.24.2020	7	0	7	0	A	L	Low	L4
19	9.24.2020	7	0	7	0	A	L	Low	L4
20	9.24.2020	7	0	7	0	A	L	Low	L4
1	9.24.2020	1	1	1	1	B	L	Low	L4
2	9.24.2020	1	1	1	1	B	L	Low	L4
3	9.24.2020	1	1	1	1	B	L	Low	L4
4	9.24.2020	1	1	1	1	B	L	Low	L4
5	9.24.2020	2	1	2	1	B	L	Low	L4
6	9.24.2020	2	1	2	1	B	L	Low	L4
7	9.24.2020	2	1	2	1	B	L	Low	L4
8	9.24.2020	2	1	2	1	B	L	Low	L4
9	9.24.2020	2	1	2	1	B	L	Low	L4
10	9.24.2020	7	1	7	1	B	L	Low	L4
11	9.24.2020	2	1	2	1	B	L	Low	L4
12	9.24.2020	3	1	3	1	B	L	Low	L4
13	9.24.2020	3	1	3	1	B	L	Low	L4
14	9.24.2020	3	1	3	1	B	L	Low	L4
15	9.24.2020	5	1	5	1	B	L	Low	L4
16	9.24.2020	7	1	7	1	B	L	Low	L4
17	9.24.2020	7	0	7	0	B	L	Low	L4
18	9.24.2020	7	0	7	0	B	L	Low	L4
19	9.24.2020	7	0	7	0	B	L	Low	L4
20	9.24.2020	7	0	7	0	B	L	Low	L4
1	9.24.2020	1	1	1	1	A	L	Low	L5
2	9.24.2020	2	1	2	1	A	L	Low	L5
3	9.24.2020	2	1	2	1	A	L	Low	L5
4	9.24.2020	3	1	3	1	A	L	Low	L5
5	9.24.2020	3	1	3	1	A	L	Low	L5
6	9.24.2020	3	1	3	1	A	L	Low	L5
7	9.24.2020	4	1	4	1	A	L	Low	L5
8	9.24.2020	4	1	4	1	A	L	Low	L5
9	9.24.2020	5	1	5	1	A	L	Low	L5
10	9.24.2020	6	1	6	1	A	L	Low	L5
11	9.24.2020	7	1	7	1	A	L	Low	L5
12	9.24.2020	7	1	7	1	A	L	Low	L5
13	9.24.2020	7	0	7	0	A	L	Low	L5
14	9.24.2020	7	0	7	0	A	L	Low	L5
15	9.24.2020	7	0	7	0	A	L	Low	L5
16	9.24.2020	7	0	7	0	A	L	Low	L5
17	9.24.2020	7	0	7	0	A	L	Low	L5
18	9.24.2020	7	0	7	0	A	L	Low	L5
19	9.24.2020	7	0	7	0	A	L	Low	L5
20	9.24.2020	7	0	7	0	A	L	Low	L5
1	9.24.2020	1	1	1	1	B	L	Low	L5
2	9.24.2020	1	1	1	1	B	L	Low	L5
3	9.24.2020	2	1	2	1	B	L	Low	L5
4	9.24.2020	3	1	3	1	B	L	Low	L5
5	9.24.2020	4	1	4	1	B	L	Low	L5
6	9.24.2020	4	1	4	1	B	L	Low	L5
7	9.24.2020	5	1	5	1	B	L	Low	L5
8	9.24.2020	5	1	5	1	B	L	Low	L5
9	9.24.2020	6	1	6	1	B	L	Low	L5
10	9.24.2020	7	1	7	1	B	L	Low	L5
11	9.24.2020	7	1	7	1	B	L	Low	L5
12	9.24.2020	7	0	7	0	B	L	Low	L5
13	9.24.2020	7	0	7	0	B	L	Low	L5
14	9.24.2020	7	0	7	0	B	L	Low	L5
15	9.24.2020	7	0	7	0	B	L	Low	L5
16	9.24.2020	7	0	7	0	B	L	Low	L5
17	9.24.2020	7	0	7	0	B	L	Low	L5
18	9.24.2020	7	0	7	0	B	L	Low	L5
19	9.24.2020	7	0	7	0	B	L	Low	L5
20	9.24.2020	7	0	7	0	B	L	Low	L5
1	9.25.2020	1	1	1	1	A	L	Low	L6
2	9.25.2020	1	1	1	1	A	L	Low	L6
3	9.25.2020	2	1	2	1	A	L	Low	L6
4	9.25.2020	2	1	2	1	A	L	Low	L6
5	9.25.2020	2	1	2	1	A	L	Low	L6
6	9.25.2020	3	1	3	1	A	L	Low	L6
7	9.25.2020	3	1	3	1	A	L	Low	L6
8	9.25.2020	3	1	3	1	A	L	Low	L6
9	9.25.2020	5	1	5	1	A	L	Low	L6
10	9.25.2020	5	1	5	1	A	L	Low	L6
11	9.25.2020	7	1	7	1	A	L	Low	L6
12	9.25.2020	7	0	4	0	A	L	Low	L6
13	9.25.2020	7	0	7	0	A	L	Low	L6
14	9.25.2020	7	0	7	0	A	L	Low	L6
15	9.25.2020	7	0	7	0	A	L	Low	L6
16	9.25.2020	7	0	7	0	A	L	Low	L6
17	9.25.2020	7	0	7	0	A	L	Low	L6
18	9.25.2020	7	0	7	0	A	L	Low	L6
19	9.25.2020	7	0	7	0	A	L	Low	L6
20	9.25.2020	7	0	7	0	A	L	Low	L6
1	9.25.2020	1	1	1	1	B	L	Low	L6
2	9.25.2020	2	1	2	1	B	L	Low	L6
3	9.25.2020	3	1	3	1	B	L	Low	L6
4	9.25.2020	3	1	3	1	B	L	Low	L6
5	9.25.2020	3	1	3	1	B	L	Low	L6
6	9.25.2020	4	1	4	1	B	L	Low	L6
7	9.25.2020	5	1	5	1	B	L	Low	L6
8	9.25.2020	5	1	5	1	B	L	Low	L6
9	9.25.2020	5	1	5	1	B	L	Low	L6
10	9.25.2020	5	1	5	1	B	L	Low	L6
11	9.25.2020	6	1	6	1	B	L	Low	L6
12	9.25.2020	7	1	7	1	B	L	Low	L6
13	9.25.2020	7	0	7	0	B	L	Low	L6
14	9.25.2020	7	0	7	0	B	L	Low	L6
15	9.25.2020	7	0	7	0	B	L	Low	L6
16	9.25.2020	7	0	7	0	B	L	Low	L6
17	9.25.2020	7	0	7	0	B	L	Low	L6
18	9.25.2020	7	0	7	0	B	L	Low	L6
19	9.25.2020	7	0	7	0	B	L	Low	L6
20	9.25.2020	7	0	7	0	B	L	Low	L6
1	10.8.2020	2	1	2	1	A	M	Control	ControlA
2	10.8.2020	7	0	3	0	A	M	Control	ControlA
3	10.8.2020	7	0	3	0	A	M	Control	ControlA
4	10.8.2020	7	0	4	0	A	M	Control	ControlA
5	10.8.2020	7	0	4	0	A	M	Control	ControlA
6	10.8.2020	7	0	4	0	A	M	Control	ControlA
7	10.8.2020	7	0	5	0	A	M	Control	ControlA
8	10.8.2020	7	0	5	0	A	M	Control	ControlA
9	10.8.2020	7	0	6	0	A	M	Control	ControlA
10	10.8.2020	7	0	6	0	A	M	Control	ControlA
11	10.8.2020	7	0	7	0	A	M	Control	ControlA
12	10.8.2020	7	0	7	0	A	M	Control	ControlA
13	10.8.2020	7	0	7	0	A	M	Control	ControlA
14	10.8.2020	7	0	7	0	A	M	Control	ControlA
15	10.8.2020	7	0	7	0	A	M	Control	ControlA
16	10.8.2020	7	0	7	0	A	M	Control	ControlA
17	10.8.2020	7	0	7	0	A	M	Control	ControlA
18	10.8.2020	7	0	7	0	A	M	Control	ControlA
19	10.8.2020	7	0	7	0	A	M	Control	ControlA
20	10.8.2020	7	0	7	0	A	M	Control	ControlA
1	10.8.2020	7	1	7	1	B	M	Control	ControlB
2	10.8.2020	7	0	4	0	B	M	Control	ControlB
3	10.8.2020	7	0	4	0	B	M	Control	ControlB
4	10.8.2020	7	0	4	0	B	M	Control	ControlB
5	10.8.2020	7	0	4	0	B	M	Control	ControlB
6	10.8.2020	7	0	4	0	B	M	Control	ControlB
7	10.8.2020	7	0	4	0	B	M	Control	ControlB
8	10.8.2020	7	0	4	0	B	M	Control	ControlB
9	10.8.2020	7	0	5	0	B	M	Control	ControlB
10	10.8.2020	7	0	6	0	B	M	Control	ControlB
11	10.8.2020	7	0	6	0	B	M	Control	ControlB
12	10.8.2020	7	0	7	0	B	M	Control	ControlB
13	10.8.2020	7	0	7	0	B	M	Control	ControlB
14	10.8.2020	7	0	7	0	B	M	Control	ControlB
15	10.8.2020	7	0	7	0	B	M	Control	ControlB
16	10.8.2020	7	0	7	0	B	M	Control	ControlB
17	10.8.2020	7	0	7	0	B	M	Control	ControlB
18	10.8.2020	7	0	7	0	B	M	Control	ControlB
19	10.8.2020	7	0	7	0	B	M	Control	ControlB
20	10.8.2020	7	0	7	0	B	M	Control	ControlB
1	10.9.2020	1	1	1	1	C	M	Control	ControlC
2	10.9.2020	5	1	2	1	C	M	Control	ControlC
3	10.9.2020	7	0	3	0	C	M	Control	ControlC
4	10.9.2020	7	0	4	0	C	M	Control	ControlC
5	10.9.2020	7	0	4	0	C	M	Control	ControlC
6	10.9.2020	7	0	5	0	C	M	Control	ControlC
7	10.9.2020	7	0	7	0	C	M	Control	ControlC
8	10.9.2020	7	0	7	0	C	M	Control	ControlC
9	10.9.2020	7	0	7	0	C	M	Control	ControlC
10	10.9.2020	7	0	7	0	C	M	Control	ControlC
11	10.9.2020	7	0	7	0	C	M	Control	ControlC
12	10.9.2020	7	0	7	0	C	M	Control	ControlC
13	10.9.2020	7	0	7	0	C	M	Control	ControlC
14	10.9.2020	7	0	7	0	C	M	Control	ControlC
15	10.9.2020	7	0	7	0	C	M	Control	ControlC
16	10.9.2020	7	0	7	0	C	M	Control	ControlC
17	10.9.2020	7	0	7	0	C	M	Control	ControlC
18	10.9.2020	7	0	7	0	C	M	Control	ControlC
19	10.9.2020	7	0	7	0	C	M	Control	ControlC
20	10.9.2020	7	0	7	0	C	M	Control	ControlC
1	10.9.2020	7	0	3	0	D	M	Control	ControlD
2	10.9.2020	7	0	4	0	D	M	Control	ControlD
3	10.9.2020	7	0	4	0	D	M	Control	ControlD
4	10.9.2020	7	0	4	0	D	M	Control	ControlD
5	10.9.2020	7	0	4	0	D	M	Control	ControlD
6	10.9.2020	7	0	4	0	D	M	Control	ControlD
7	10.9.2020	7	0	5	0	D	M	Control	ControlD
8	10.9.2020	7	0	5	0	D	M	Control	ControlD
9	10.9.2020	7	0	5	0	D	M	Control	ControlD
10	10.9.2020	7	0	7	0	D	M	Control	ControlD
11	10.9.2020	7	0	7	0	D	M	Control	ControlD
12	10.9.2020	7	0	7	0	D	M	Control	ControlD
13	10.9.2020	7	0	7	0	D	M	Control	ControlD
14	10.9.2020	7	0	7	0	D	M	Control	ControlD
15	10.9.2020	7	0	7	0	D	M	Control	ControlD
16	10.9.2020	7	0	7	0	D	M	Control	ControlD
17	10.9.2020	7	0	7	0	D	M	Control	ControlD
18	10.9.2020	7	0	7	0	D	M	Control	ControlD
19	10.9.2020	7	0	7	0	D	M	Control	ControlD
20	10.9.2020	7	0	7	0	D	M	Control	ControlD
1	10.8.2020	2	1	2	1	A	M	High	H1
2	10.8.2020	3	1	3	1	A	M	High	H1
3	10.8.2020	3	1	3	1	A	M	High	H1
4	10.8.2020	3	1	3	1	A	M	High	H1
5	10.8.2020	4	1	4	1	A	M	High	H1
6	10.8.2020	5	1	5	1	A	M	High	H1
7	10.8.2020	6	1	6	1	A	M	High	H1
8	10.8.2020	7	0	6	0	A	M	High	H1
9	10.8.2020	7	0	7	0	A	M	High	H1
10	10.8.2020	7	0	7	0	A	M	High	H1
11	10.8.2020	7	0	7	0	A	M	High	H1
12	10.8.2020	7	0	7	0	A	M	High	H1
13	10.8.2020	7	0	7	0	A	M	High	H1
14	10.8.2020	7	0	7	0	A	M	High	H1
15	10.8.2020	7	0	7	0	A	M	High	H1
16	10.8.2020	7	0	7	0	A	M	High	H1
17	10.8.2020	7	0	7	0	A	M	High	H1
18	10.8.2020	7	0	7	0	A	M	High	H1
19	10.8.2020	7	0	7	0	A	M	High	H1
20	10.8.2020	7	0	7	0	A	M	High	H1
1	10.8.2020	1	1	1	1	B	M	High	H1
2	10.8.2020	2	1	2	1	B	M	High	H1
3	10.8.2020	3	1	3	1	B	M	High	H1
4	10.8.2020	4	1	4	1	B	M	High	H1
5	10.8.2020	4	1	4	1	B	M	High	H1
6	10.8.2020	7	1	7	1	B	M	High	H1
7	10.8.2020	7	0	5	0	B	M	High	H1
8	10.8.2020	7	0	7	0	B	M	High	H1
9	10.8.2020	7	0	7	0	B	M	High	H1
10	10.8.2020	7	0	7	0	B	M	High	H1
11	10.8.2020	7	0	7	0	B	M	High	H1
12	10.8.2020	7	0	7	0	B	M	High	H1
13	10.8.2020	7	0	7	0	B	M	High	H1
14	10.8.2020	7	0	7	0	B	M	High	H1
15	10.8.2020	7	0	7	0	B	M	High	H1
16	10.8.2020	7	0	7	0	B	M	High	H1
17	10.8.2020	7	0	7	0	B	M	High	H1
18	10.8.2020	7	0	7	0	B	M	High	H1
19	10.8.2020	7	0	7	0	B	M	High	H1
20	10.8.2020	7	0	7	0	B	M	High	H1
1	10.8.2020	1	1	1	1	A	M	High	H2
2	10.8.2020	1	1	1	1	A	M	High	H2
3	10.8.2020	3	1	3	1	A	M	High	H2
4	10.8.2020	3	1	3	1	A	M	High	H2
5	10.8.2020	3	1	3	1	A	M	High	H2
6	10.8.2020	6	1	6	1	A	M	High	H2
7	10.8.2020	6	1	6	1	A	M	High	H2
8	10.8.2020	7	1	7	1	A	M	High	H2
9	10.8.2020	7	0	5	0	A	M	High	H2
10	10.8.2020	7	0	7	0	A	M	High	H2
11	10.8.2020	7	0	7	0	A	M	High	H2
12	10.8.2020	7	0	7	0	A	M	High	H2
13	10.8.2020	7	0	7	0	A	M	High	H2
14	10.8.2020	7	0	7	0	A	M	High	H2
15	10.8.2020	7	0	7	0	A	M	High	H2
16	10.8.2020	7	0	7	0	A	M	High	H2
17	10.8.2020	7	0	7	0	A	M	High	H2
18	10.8.2020	7	0	7	0	A	M	High	H2
19	10.8.2020	7	0	7	0	A	M	High	H2
20	10.8.2020	7	0	7	0	A	M	High	H2
1	10.8.2020	1	1	1	1	B	M	High	H2
2	10.8.2020	1	1	1	1	B	M	High	H2
3	10.8.2020	2	1	2	1	B	M	High	H2
4	10.8.2020	2	1	2	1	B	M	High	H2
5	10.8.2020	3	1	3	1	B	M	High	H2
6	10.8.2020	4	1	4	1	B	M	High	H2
7	10.8.2020	4	1	4	1	B	M	High	H2
8	10.8.2020	4	1	4	1	B	M	High	H2
9	10.8.2020	5	1	5	1	B	M	High	H2
10	10.8.2020	7	0	7	0	B	M	High	H2
11	10.8.2020	7	0	7	0	B	M	High	H2
12	10.8.2020	7	0	7	0	B	M	High	H2
13	10.8.2020	7	0	7	0	B	M	High	H2
14	10.8.2020	7	0	7	0	B	M	High	H2
15	10.8.2020	7	0	7	0	B	M	High	H2
16	10.8.2020	7	0	7	0	B	M	High	H2
17	10.8.2020	7	0	7	0	B	M	High	H2
18	10.8.2020	7	0	7	0	B	M	High	H2
19	10.8.2020	7	0	7	0	B	M	High	H2
20	10.8.2020	7	0	7	0	B	M	High	H2
1	10.8.2020	1	1	1	1	A	M	High	H3
2	10.8.2020	1	1	1	1	A	M	High	H3
3	10.8.2020	1	1	1	1	A	M	High	H3
4	10.8.2020	1	1	1	1	A	M	High	H3
5	10.8.2020	2	1	2	1	A	M	High	H3
6	10.8.2020	2	1	2	1	A	M	High	H3
7	10.8.2020	3	1	3	1	A	M	High	H3
8	10.8.2020	4	1	4	1	A	M	High	H3
9	10.8.2020	5	1	5	1	A	M	High	H3
10	10.8.2020	7	1	7	1	A	M	High	H3
11	10.8.2020	7	1	7	1	A	M	High	H3
12	10.8.2020	7	1	7	1	A	M	High	H3
13	10.8.2020	7	0	7	0	A	M	High	H3
14	10.8.2020	7	0	7	0	A	M	High	H3
15	10.8.2020	7	0	7	0	A	M	High	H3
16	10.8.2020	7	0	7	0	A	M	High	H3
17	10.8.2020	7	0	7	0	A	M	High	H3
18	10.8.2020	7	0	7	0	A	M	High	H3
19	10.8.2020	7	0	7	0	A	M	High	H3
20	10.8.2020	7	0	7	0	A	M	High	H3
1	10.8.2020	1	1	1	1	B	M	High	H3
2	10.8.2020	1	1	1	1	B	M	High	H3
3	10.8.2020	1	1	1	1	B	M	High	H3
4	10.8.2020	1	1	1	1	B	M	High	H3
5	10.8.2020	1	1	1	1	B	M	High	H3
6	10.8.2020	2	1	2	1	B	M	High	H3
7	10.8.2020	3	1	3	1	B	M	High	H3
8	10.8.2020	4	1	4	1	B	M	High	H3
9	10.8.2020	4	1	4	1	B	M	High	H3
10	10.8.2020	4	1	4	1	B	M	High	H3
11	10.8.2020	5	1	5	1	B	M	High	H3
12	10.8.2020	5	1	5	1	B	M	High	H3
13	10.8.2020	7	1	7	1	B	M	High	H3
14	10.8.2020	7	0	7	0	B	M	High	H3
15	10.8.2020	7	0	7	0	B	M	High	H3
16	10.8.2020	7	0	7	0	B	M	High	H3
17	10.8.2020	7	0	7	0	B	M	High	H3
18	10.8.2020	7	0	7	0	B	M	High	H3
19	10.8.2020	7	0	7	0	B	M	High	H3
20	10.8.2020	7	0	7	0	B	M	High	H3
1	10.9.2020	2	1	2	1	A	M	High	H4
2	10.9.2020	2	1	2	1	A	M	High	H4
3	10.9.2020	3	1	3	1	A	M	High	H4
4	10.9.2020	3	1	3	1	A	M	High	H4
5	10.9.2020	3	1	3	1	A	M	High	H4
6	10.9.2020	3	1	3	1	A	M	High	H4
7	10.9.2020	4	1	4	1	A	M	High	H4
8	10.9.2020	4	1	4	1	A	M	High	H4
9	10.9.2020	4	1	4	1	A	M	High	H4
10	10.9.2020	5	1	5	1	A	M	High	H4
11	10.9.2020	7	0	6	0	A	M	High	H4
12	10.9.2020	7	0	7	0	A	M	High	H4
13	10.9.2020	7	0	7	0	A	M	High	H4
14	10.9.2020	7	0	7	0	A	M	High	H4
15	10.9.2020	7	0	7	0	A	M	High	H4
16	10.9.2020	7	0	7	0	A	M	High	H4
17	10.9.2020	7	0	7	0	A	M	High	H4
18	10.9.2020	7	0	7	0	A	M	High	H4
19	10.9.2020	7	0	7	0	A	M	High	H4
20	10.9.2020	7	0	7	0	A	M	High	H4
1	10.9.2020	1	1	1	1	B	M	High	H4
2	10.9.2020	1	1	1	1	B	M	High	H4
3	10.9.2020	1	1	1	1	B	M	High	H4
4	10.9.2020	1	1	1	1	B	M	High	H4
5	10.9.2020	2	1	2	1	B	M	High	H4
6	10.9.2020	2	1	2	1	B	M	High	H4
7	10.9.2020	2	1	2	1	B	M	High	H4
8	10.9.2020	2	1	2	1	B	M	High	H4
9	10.9.2020	3	1	3	1	B	M	High	H4
10	10.9.2020	3	1	3	1	B	M	High	H4
11	10.9.2020	4	1	4	1	B	M	High	H4
12	10.9.2020	4	1	4	1	B	M	High	H4
13	10.9.2020	4	1	4	1	B	M	High	H4
14	10.9.2020	5	1	5	1	B	M	High	H4
15	10.9.2020	7	0	7	0	B	M	High	H4
16	10.9.2020	7	0	7	0	B	M	High	H4
17	10.9.2020	7	0	7	0	B	M	High	H4
18	10.9.2020	7	0	7	0	B	M	High	H4
19	10.9.2020	7	0	7	0	B	M	High	H4
20	10.9.2020	7	0	7	0	B	M	High	H4
1	10.9.2020	1	1	1	1	A	M	High	H5
2	10.9.2020	1	1	1	1	A	M	High	H5
3	10.9.2020	1	1	1	1	A	M	High	H5
4	10.9.2020	1	1	1	1	A	M	High	H5
5	10.9.2020	2	1	2	1	A	M	High	H5
6	10.9.2020	2	1	2	1	A	M	High	H5
7	10.9.2020	2	1	2	1	A	M	High	H5
8	10.9.2020	2	1	2	1	A	M	High	H5
9	10.9.2020	3	1	3	1	A	M	High	H5
10	10.9.2020	3	1	3	1	A	M	High	H5
11	10.9.2020	4	1	4	1	A	M	High	H5
12	10.9.2020	4	1	4	1	A	M	High	H5
13	10.9.2020	4	1	4	1	A	M	High	H5
14	10.9.2020	5	1	5	1	A	M	High	H5
15	10.9.2020	5	1	5	1	A	M	High	H5
16	10.9.2020	6	1	6	1	A	M	High	H5
17	10.9.2020	7	1	7	1	A	M	High	H5
18	10.9.2020	7	1	7	1	A	M	High	H5
19	10.9.2020	7	0	5	0	A	M	High	H5
20	10.9.2020	7	0	7	0	A	M	High	H5
1	10.9.2020	1	1	1	1	B	M	High	H5
2	10.9.2020	1	1	1	1	B	M	High	H5
3	10.9.2020	1	1	1	1	B	M	High	H5
4	10.9.2020	1	1	1	1	B	M	High	H5
5	10.9.2020	1	1	1	1	B	M	High	H5
6	10.9.2020	1	1	1	1	B	M	High	H5
7	10.9.2020	1	1	1	1	B	M	High	H5
8	10.9.2020	1	1	1	1	B	M	High	H5
9	10.9.2020	1	1	1	1	B	M	High	H5
10	10.9.2020	1	1	1	1	B	M	High	H5
11	10.9.2020	1	1	1	1	B	M	High	H5
12	10.9.2020	1	1	1	1	B	M	High	H5
13	10.9.2020	1	1	1	1	B	M	High	H5
14	10.9.2020	1	1	1	1	B	M	High	H5
15	10.9.2020	1	1	1	1	B	M	High	H5
16	10.9.2020	1	1	1	1	B	M	High	H5
17	10.9.2020	1	1	1	1	B	M	High	H5
18	10.9.2020	2	1	2	1	B	M	High	H5
19	10.9.2020	7	0	7	0	B	M	High	H5
20	10.9.2020	7	0	7	0	B	M	High	H5
1	10.9.2020	1	1	1	1	A	M	High	H6
2	10.9.2020	1	1	1	1	A	M	High	H6
3	10.9.2020	1	1	1	1	A	M	High	H6
4	10.9.2020	1	1	1	1	A	M	High	H6
5	10.9.2020	1	1	1	1	A	M	High	H6
6	10.9.2020	1	1	1	1	A	M	High	H6
7	10.9.2020	1	1	1	1	A	M	High	H6
8	10.9.2020	1	1	1	1	A	M	High	H6
9	10.9.2020	1	1	1	1	A	M	High	H6
10	10.9.2020	1	1	1	1	A	M	High	H6
11	10.9.2020	1	1	1	1	A	M	High	H6
12	10.9.2020	1	1	1	1	A	M	High	H6
13	10.9.2020	1	1	1	1	A	M	High	H6
14	10.9.2020	1	1	1	1	A	M	High	H6
15	10.9.2020	2	1	2	1	A	M	High	H6
16	10.9.2020	2	1	2	1	A	M	High	H6
17	10.9.2020	3	1	3	1	A	M	High	H6
18	10.9.2020	7	0	7	0	A	M	High	H6
19	10.9.2020	7	0	7	0	A	M	High	H6
20	10.9.2020	7	0	7	0	A	M	High	H6
1	10.9.2020	1	1	1	1	B	M	High	H6
2	10.9.2020	1	1	1	1	B	M	High	H6
3	10.9.2020	1	1	1	1	B	M	High	H6
4	10.9.2020	1	1	1	1	B	M	High	H6
5	10.9.2020	1	1	1	1	B	M	High	H6
6	10.9.2020	1	1	1	1	B	M	High	H6
7	10.9.2020	1	1	1	1	B	M	High	H6
8	10.9.2020	1	1	1	1	B	M	High	H6
9	10.9.2020	1	1	1	1	B	M	High	H6
10	10.9.2020	1	1	1	1	B	M	High	H6
11	10.9.2020	2	1	2	1	B	M	High	H6
12	10.9.2020	2	1	2	1	B	M	High	H6
13	10.9.2020	2	1	2	1	B	M	High	H6
14	10.9.2020	4	1	4	1	B	M	High	H6
15	10.9.2020	5	1	5	1	B	M	High	H6
16	10.9.2020	7	1	7	1	B	M	High	H6
17	10.9.2020	7	0	7	0	B	M	High	H6
18	10.9.2020	7	0	7	0	B	M	High	H6
19	10.9.2020	7	0	7	0	B	M	High	H6
20	10.9.2020	7	0	7	0	B	M	High	H6
1	10.8.2020	3	1	3	1	A	M	Low	L1
2	10.8.2020	5	1	5	1	A	M	Low	L1
3	10.8.2020	7	1	7	1	A	M	Low	L1
4	10.8.2020	7	0	3	0	A	M	Low	L1
5	10.8.2020	7	0	5	0	A	M	Low	L1
6	10.8.2020	7	0	7	0	A	M	Low	L1
7	10.8.2020	7	0	7	0	A	M	Low	L1
8	10.8.2020	7	0	7	0	A	M	Low	L1
9	10.8.2020	7	0	7	0	A	M	Low	L1
10	10.8.2020	7	0	7	0	A	M	Low	L1
11	10.8.2020	7	0	7	0	A	M	Low	L1
12	10.8.2020	7	0	7	0	A	M	Low	L1
13	10.8.2020	7	0	7	0	A	M	Low	L1
14	10.8.2020	7	0	7	0	A	M	Low	L1
15	10.8.2020	7	0	7	0	A	M	Low	L1
16	10.8.2020	7	0	7	0	A	M	Low	L1
17	10.8.2020	7	0	7	0	A	M	Low	L1
18	10.8.2020	7	0	7	0	A	M	Low	L1
19	10.8.2020	7	0	7	0	A	M	Low	L1
20	10.8.2020	7	0	7	0	A	M	Low	L1
1	10.8.2020	1	1	1	1	B	M	Low	L1
2	10.8.2020	2	1	2	1	B	M	Low	L1
3	10.8.2020	2	1	2	1	B	M	Low	L1
4	10.8.2020	2	1	2	1	B	M	Low	L1
5	10.8.2020	4	1	4	1	B	M	Low	L1
6	10.8.2020	5	1	5	1	B	M	Low	L1
7	10.8.2020	6	1	6	1	B	M	Low	L1
8	10.8.2020	7	1	7	1	B	M	Low	L1
9	10.8.2020	7	1	7	1	B	M	Low	L1
10	10.8.2020	7	0	7	0	B	M	Low	L1
11	10.8.2020	7	0	7	0	B	M	Low	L1
12	10.8.2020	7	0	7	0	B	M	Low	L1
13	10.8.2020	7	0	7	0	B	M	Low	L1
14	10.8.2020	7	0	7	0	B	M	Low	L1
15	10.8.2020	7	0	7	0	B	M	Low	L1
16	10.8.2020	7	0	7	0	B	M	Low	L1
17	10.8.2020	7	0	7	0	B	M	Low	L1
18	10.8.2020	7	0	7	0	B	M	Low	L1
19	10.8.2020	7	0	7	0	B	M	Low	L1
20	10.8.2020	7	0	7	0	B	M	Low	L1
1	10.8.2020	1	1	1	1	A	M	Low	L2
2	10.8.2020	2	1	2	1	A	M	Low	L2
3	10.8.2020	2	1	2	1	A	M	Low	L2
4	10.8.2020	6	1	6	1	A	M	Low	L2
5	10.8.2020	6	1	6	1	A	M	Low	L2
6	10.8.2020	7	1	7	1	A	M	Low	L2
7	10.8.2020	7	0	4	0	A	M	Low	L2
8	10.8.2020	7	0	6	0	A	M	Low	L2
9	10.8.2020	7	0	6	0	A	M	Low	L2
10	10.8.2020	7	0	6	0	A	M	Low	L2
11	10.8.2020	7	0	7	0	A	M	Low	L2
12	10.8.2020	7	0	7	0	A	M	Low	L2
13	10.8.2020	7	0	7	0	A	M	Low	L2
14	10.8.2020	7	0	7	0	A	M	Low	L2
15	10.8.2020	7	0	7	0	A	M	Low	L2
16	10.8.2020	7	0	7	0	A	M	Low	L2
17	10.8.2020	7	0	7	0	A	M	Low	L2
18	10.8.2020	7	0	7	0	A	M	Low	L2
19	10.8.2020	7	0	7	0	A	M	Low	L2
20	10.8.2020	7	0	7	0	A	M	Low	L2
1	10.8.2020	1	1	1	1	B	M	Low	L2
2	10.8.2020	1	1	1	1	B	M	Low	L2
3	10.8.2020	1	1	1	1	B	M	Low	L2
4	10.8.2020	2	1	2	1	B	M	Low	L2
5	10.8.2020	2	1	2	1	B	M	Low	L2
6	10.8.2020	4	1	4	1	B	M	Low	L2
7	10.8.2020	5	1	5	1	B	M	Low	L2
8	10.8.2020	5	1	5	1	B	M	Low	L2
9	10.8.2020	7	1	7	1	B	M	Low	L2
10	10.8.2020	7	1	7	1	B	M	Low	L2
11	10.8.2020	7	0	7	0	B	M	Low	L2
12	10.8.2020	7	0	7	0	B	M	Low	L2
13	10.8.2020	7	0	7	0	B	M	Low	L2
14	10.8.2020	7	0	7	0	B	M	Low	L2
15	10.8.2020	7	0	7	0	B	M	Low	L2
16	10.8.2020	7	0	7	0	B	M	Low	L2
17	10.8.2020	7	0	7	0	B	M	Low	L2
18	10.8.2020	7	0	7	0	B	M	Low	L2
19	10.8.2020	7	0	7	0	B	M	Low	L2
20	10.8.2020	7	0	7	0	B	M	Low	L2
1	10.8.2020	1	1	1	1	A	M	Low	L3
2	10.8.2020	1	1	1	1	A	M	Low	L3
3	10.8.2020	2	1	2	1	A	M	Low	L3
4	10.8.2020	3	1	3	1	A	M	Low	L3
5	10.8.2020	5	1	5	1	A	M	Low	L3
6	10.8.2020	6	1	6	1	A	M	Low	L3
7	10.8.2020	7	1	7	1	A	M	Low	L3
8	10.8.2020	7	0	7	0	A	M	Low	L3
9	10.8.2020	7	0	7	0	A	M	Low	L3
10	10.8.2020	7	0	7	0	A	M	Low	L3
11	10.8.2020	7	0	7	0	A	M	Low	L3
12	10.8.2020	7	0	7	0	A	M	Low	L3
13	10.8.2020	7	0	7	0	A	M	Low	L3
14	10.8.2020	7	0	7	0	A	M	Low	L3
15	10.8.2020	7	0	7	0	A	M	Low	L3
16	10.8.2020	7	0	7	0	A	M	Low	L3
17	10.8.2020	7	0	7	0	A	M	Low	L3
18	10.8.2020	7	0	7	0	A	M	Low	L3
19	10.8.2020	7	0	7	0	A	M	Low	L3
20	10.8.2020	7	0	7	0	A	M	Low	L3
1	10.8.2020	1	1	1	1	B	M	Low	L3
2	10.8.2020	3	1	3	1	B	M	Low	L3
3	10.8.2020	6	1	6	1	B	M	Low	L3
4	10.8.2020	7	1	7	1	B	M	Low	L3
5	10.8.2020	7	1	7	1	B	M	Low	L3
6	10.8.2020	7	0	7	0	B	M	Low	L3
7	10.8.2020	7	0	7	0	B	M	Low	L3
8	10.8.2020	7	0	7	0	B	M	Low	L3
9	10.8.2020	7	0	7	0	B	M	Low	L3
10	10.8.2020	7	0	7	0	B	M	Low	L3
11	10.8.2020	7	0	7	0	B	M	Low	L3
12	10.8.2020	7	0	7	0	B	M	Low	L3
13	10.8.2020	7	0	7	0	B	M	Low	L3
14	10.8.2020	7	0	7	0	B	M	Low	L3
15	10.8.2020	7	0	7	0	B	M	Low	L3
16	10.8.2020	7	0	7	0	B	M	Low	L3
17	10.8.2020	7	0	7	0	B	M	Low	L3
18	10.8.2020	7	0	7	0	B	M	Low	L3
19	10.8.2020	7	0	7	0	B	M	Low	L3
20	10.8.2020	7	0	7	0	B	M	Low	L3
1	10.9.2020	1	1	1	1	A	M	Low	L4
2	10.9.2020	1	1	1	1	A	M	Low	L4
3	10.9.2020	1	1	1	1	A	M	Low	L4
4	10.9.2020	1	1	1	1	A	M	Low	L4
5	10.9.2020	1	1	1	1	A	M	Low	L4
6	10.9.2020	1	1	1	1	A	M	Low	L4
7	10.9.2020	2	1	2	1	A	M	Low	L4
8	10.9.2020	2	1	2	1	A	M	Low	L4
9	10.9.2020	2	1	2	1	A	M	Low	L4
10	10.9.2020	2	1	2	1	A	M	Low	L4
11	10.9.2020	2	1	2	1	A	M	Low	L4
12	10.9.2020	3	1	3	1	A	M	Low	L4
13	10.9.2020	4	1	4	1	A	M	Low	L4
14	10.9.2020	7	1	7	1	A	M	Low	L4
15	10.9.2020	7	0	7	0	A	M	Low	L4
16	10.9.2020	7	0	7	0	A	M	Low	L4
17	10.9.2020	7	0	7	0	A	M	Low	L4
18	10.9.2020	7	0	7	0	A	M	Low	L4
19	10.9.2020	7	0	7	0	A	M	Low	L4
20	10.9.2020	7	0	7	0	A	M	Low	L4
1	10.9.2020	1	1	1	1	B	M	Low	L4
2	10.9.2020	1	1	1	1	B	M	Low	L4
3	10.9.2020	1	1	1	1	B	M	Low	L4
4	10.9.2020	1	1	1	1	B	M	Low	L4
5	10.9.2020	1	1	1	1	B	M	Low	L4
6	10.9.2020	1	1	1	1	B	M	Low	L4
7	10.9.2020	1	1	1	1	B	M	Low	L4
8	10.9.2020	2	1	2	1	B	M	Low	L4
9	10.9.2020	2	1	2	1	B	M	Low	L4
10	10.9.2020	3	1	3	1	B	M	Low	L4
11	10.9.2020	3	1	3	1	B	M	Low	L4
12	10.9.2020	4	1	4	1	B	M	Low	L4
13	10.9.2020	4	1	4	1	B	M	Low	L4
14	10.9.2020	7	1	7	1	B	M	Low	L4
15	10.9.2020	7	1	7	1	B	M	Low	L4
16	10.9.2020	7	1	7	1	B	M	Low	L4
17	10.9.2020	7	0	7	0	B	M	Low	L4
18	10.9.2020	7	0	7	0	B	M	Low	L4
19	10.9.2020	7	0	7	0	B	M	Low	L4
[truncated: 641 more rows]
